# Supplementary material for: Intermolecular fluoroamination of allenes towards substituted vinyl fluorides
Source: Royal Society of Chemistry journal article supplement (doi:10.1039/d0ob01697g), 2020-01-01
Supplement: d0ob01697g1.pdf [file d0ob01697g1.pdf]

## Intermolecular Fluoroamination of Allenes Towards Substituted Vinyl Fluorides

Vibha Tiwari<sup>1</sup>, Jacob T. Bingham<sup>2</sup>, Shubham Vyas<sup>2\*</sup> and Anand Singh<sup>1\*</sup>

<sup>1</sup>Department of Chemistry, Indian Institute of Technology Kanpur, Kanpur-208016, U.P., India.

<sup>2</sup>Department of Chemistry, Colorado School of Mines, Golden, Colorado 80401, United States.

### Table of contents

|                                          |       |
|------------------------------------------|-------|
| Materials and methods.....               | SI-1  |
| Synthesis of starting material .....     | SI-1  |
| General Procedures .....                 | SI-1  |
| Characterization data of products.....   | SI-2  |
| NMR Spectra of Products.....             | SI-9  |
| Figure S1, S2.....                       | SI-55 |
| Table S1.....                            | SI-56 |
| Coordinates of optimized geometries..... | SI-58 |

**Materials and methods.** All reactions were performed in flame dried glassware. Dioxane was distilled from sodium prior to use. All other chemicals were obtained from commercial sources and used directly without further purification. Yields refer to chromatographically pure material. Reactions were monitored by thin-layer chromatography (TLC) performed on 0.25 mm Merck TLC Silica gel 60F<sub>254</sub>, precoated on aluminium sheets using UV light as a visualizing agent. Merck silica gel (particle size 100-200 and 230-400 mesh) was used for flash column chromatography.

NMR spectra were recorded on Bruker Avance 500 (<sup>1</sup>H: 500 MHz, <sup>13</sup>C: 125 MHz) or 400 (<sup>1</sup>H: 400 MHz, <sup>13</sup>C: 100 MHz) NMR spectrometers in CDCl<sub>3</sub> having TMS 0.03% as internal standard. <sup>19</sup>F were recorded PhCF<sub>3</sub> as reference standard. Mass spectrometric data were obtained using WATERS-Q-TOF Premier-ESI-MS.

The following abbreviations were used to explain the multiplicities: s = singlet, d = doublet, t = triplet, q = quartet, dd = doublet of doublet, ddd = doublet of a doublet of doublet, m = multiplet.

The crystal structures of **4a**, **6c**, and **6i'** have been deposited in the CCDC with the deposition numbers 2003624, 2003625, and 2002738 respectively.

### Synthesis of Precursors

Diaryl allenes<sup>[1]</sup>, triazoles<sup>[2]</sup> and tetrazoles<sup>[3]</sup> were synthesized by the using the procedures reported in the literature.

#### General procedure for Aminofluorination (A) :

1,3-diphenylpropa-1,2-diene was taken in a reaction vial and nitromethane solvent (0.5 mL/0.1 mmol of allene) was added followed by selectfluor and the nucleophile. The reaction mixture was stirred at room temperature for 15h. After completion of the reaction (as monitored by TLC analysis), the reaction mixture was poured in a separating funnel and extracted with EtOAc (x3). The combined organic layers was

collected, washed with brine and dried over  $\text{Na}_2\text{SO}_4$  and concentrated under reduced pressure. The residue was purified by using column chromatography on silica gel (solvent system - EtOAc/ petroleum ether).

### Procedure for Control Experiments with TEMPO & BHT (B):

1,3-diphenylpropa-1,2-diene (161 mg, 840  $\mu\text{mol}$ ) was taken in reaction vial and nitromethane (4mL) was added followed by selectfluor (238 mg, 672  $\mu\text{mol}$ ), nucleophile (40 mg, 336  $\mu\text{mol}$ ) and TEMPO or BHT (5 equiv). The reaction mixture was stirred at room temperature for 24h, after which no formation of the vinylfluoride product was observed.

### Characterization Data of Products

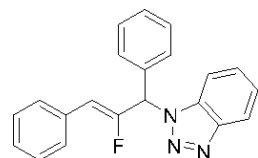

#### (Z)-1-(2-fluoro-1,3-diphenylallyl)-1H-benzo[d][1,2,3]triazole (4a) :

According to the general procedure, benzotriazole **1a** (40 mg 336  $\mu\text{mol}$ ), selectfluor (238 mg, 671  $\mu\text{mol}$ ) and diphenyl allene (161 mg, 840  $\mu\text{mol}$ ) provided **4a** as a yellow solid (93 mg, 84%) after flash column chromatography (10% ethyl acetate in petroleum ether);  $R_f = 0.50$  (20% ethyl acetate in petroleum ether) ;  $^1\text{H}$  NMR (400 MHz, Chloroform-*d*)  $\delta$  8.05-8.00 (m, 1H), 7.43-7.42 (m, 2H), 7.32 – 7.26 (m, 8H), 7.25 – 7.18 (m, 3H), 6.88 (d,  $J = 14.9$  Hz, 1H), 5.79 (d,  $J = 37.9$  Hz, 1H);  $^{13}\text{C}$  NMR (100 MHz, Chloroform-*d*)  $\delta$  154.6 (d,  $J = 270.4$  Hz), 146.5, 134.1, 132.7, 131.8 (d,  $J = 2.7$  Hz), 129.2, 129.1, 128.7, 128.4, 127.8, 127.7, 124.2, 120.3, 112.4 (d,  $J = 6.3$  Hz), 110.9 (d,  $J = 2.2$  Hz), 65.3 (d,  $J = 28.8$  Hz) ;  $^{19}\text{F}$  NMR (373 MHz, Chloroform-*d*)  $\delta$  -108.94 (d,  $J = 32.2$  Hz) ; HRMS calculated for  $\text{C}_{21}\text{H}_{17}\text{FN}_3^+$   $[\text{M}+\text{H}]^+$  : 330.1407; found 330.1404; IR (liquid): 3373, 3061, 1954, 1691, 1600, 1450, 1159, 748  $\text{cm}^{-1}$ .

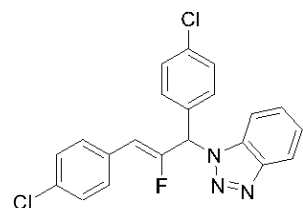

#### (Z)-1-(1,3-bis(4-chlorophenyl)-2-fluoroallyl)-1H-benzo[d][1,2,3]triazole (4b):

According to the general procedure, benzotriazole **1a** (40 mg, 336  $\mu\text{mol}$ ), selectfluor (238 mg, 671  $\mu\text{mol}$ ) and diaryl allene (219 mg, 840  $\mu\text{mol}$ ) provided **4b** as a yellow oil (91 mg, 68%) after flash column chromatography (10% ethyl acetate in petroleum ether);  $R_f = 0.50$  (20% ethyl acetate in petroleum ether),  $^1\text{H}$  NMR (400 MHz, Chloroform-*d*)  $\delta$  8.05 – 8.03 (m, 1H), 7.37 – 7.30 (m, 5H), 7.25 – 7.19 (m, 6H), 6.81 (d,  $J = 14.5$  Hz, 1H), 5.74 (d,  $J = 37.3$  Hz, 1H);  $^{13}\text{C}$  NMR (100 MHz, Chloroform-*d*)  $\delta$  154.6 (d,  $J = 271.3$  Hz), 146.6, 135.5, 134.3 (d,  $J = 3.4$  Hz), 132.6, 132.5, 130.5, 130.4, 130.2, 130.1, 129.6, 129.2, 129.0, 128.1, 124.5, 120.5, 111.5 (d,  $J = 6.2$  Hz), 110.5 (d,  $J = 2.7$  Hz), 64.5 (d,  $J = 29.2$  Hz);  $^{19}\text{F}$  NMR (373 MHz, Chloroform-*d*)  $\delta$  -102.29 – -117.60 (m); HRMS calculated for  $\text{C}_{21}\text{H}_{15}\text{Cl}_2\text{FN}_3^+$   $[\text{M}+\text{H}]^+$  : 398.0627; found 398.0628; IR (liquid): 3063, 2925, 1906, 1690, 1161, 745  $\text{cm}^{-1}$ .

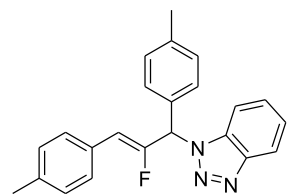

#### (Z)-1-(2-fluoro-1,3-dip-tolylallyl)-1H benzo[d][1,2,3]triazole (4c) :

According to the general procedure, benzotriazole **1a** (40 mg 336  $\mu\text{mol}$ ), selectfluor (238 mg, 671  $\mu\text{mol}$ ) and diaryl allene (185 mg, 840  $\mu\text{mol}$ ) provided **4c** as a yellow oil (97 mg, 80%) after flash column chromatography (10% ethyl acetate in petroleum ether);  $R_f = 0.57$  (20% ethyl acetate in petroleum ether),  $^1\text{H}$  NMR (500 MHz, Chloroform-*d*)  $\delta$  8.01 (d,  $J = 8.3$  Hz, 1H), 7.31 (d,  $J = 8.2$  Hz, 2H), 7.30 – 7.22 (m, 3H), 7.18 – 7.07 (m, 4H), 7.05 (d,  $J = 7.7$  Hz, 2H), 6.83 (d,  $J = 14.7$  Hz, 1H), 5.74 (d,  $J = 38.2$  Hz, 1H), 2.27 (s, 3H), 2.26 (s, 3H.);  $^{13}\text{C}$  NMR (125 MHz, Chloroform-*d*)  $\delta$  154.2 (d,  $J = 269.2$  Hz), 146.6, 139.1, 138.3, 132.8, 131.4, 129.9, 129.4, 129.1, 129.1, 127.7, 124.1, 120.3, 112.1 (d,  $J = 6.3$  Hz), 111.0, 65.2 (d,  $J = 28.9$  Hz), 21.4, 21.3;  $^{19}\text{F}$  NMR (373 MHz, Chloroform-*d*)  $\delta$  -109.86 (d,  $J = 34.6$  Hz); HRMS calculated for  $\text{C}_{23}\text{H}_{21}\text{FN}_3^+$   $[\text{M}+\text{H}]^+$  : 358.1720 ; found 358.1724; IR (liquid): 3293, 3027, 2857, 1910, 1688, 1450, 1110, 745  $\text{cm}^{-1}$ .

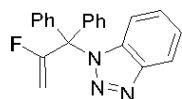

**1-(2-fluoro-1,1-diphenylallyl)-1H-benzo[d][1,2,3]triazole (4d)** : According to the general procedure, benzotriazole **1a** (40 mg, 336  $\mu$ mol), selectfluor (238 mg, 672  $\mu$ mol) and 1,1-diphenylallene (161 mg, 839  $\mu$ mol) provided **4d** as a white solid (46 mg, 41%) after flash column chromatography (10 % ethyl acetate in petroleum ether);  $R_f = 0.47$  (20% ethyl acetate in petroleum ether);  $^1\text{H NMR}$  (400 MHz, Chloroform-*d*)  $\delta$  8.01 (d,  $J = 8.3$  Hz, 1H), 7.39 (dd,  $J = 5.1, 2.5$  Hz, 4H), 7.36 – 7.27 (m, 4H), 7.23 – 7.15 (m, 5H), 5.42 (d,  $J = 19.1$  Hz, 2H) ;  $^{13}\text{C NMR}$  (100 MHz, Chloroform-*d*)  $\delta$  149.8 (d,  $J = 262.1$  Hz), 146.2, 137.0 (d,  $J = 6.8$  Hz), 136.0, 133.4, 130.5, 129.8, 129.8, 129.1, 128.6, 128.3, 128.2, 127.8, 124.2, 120.2, 109.7, 47.6 (d,  $J = 28.7$  Hz);  $^{19}\text{F NMR}$  (373 MHz, Chloroform-*d*)  $\delta$  -112.7 (t,  $J = 19.8$  Hz); HRMS calculated for  $\text{C}_{21}\text{H}_{17}\text{FN}_3^+$   $[\text{M}+\text{H}]^+$  : 330.1407; found 330.1418; IR (liquid): 3058, 2963, 1956, 1666, 1157, 764  $\text{cm}^{-1}$ .

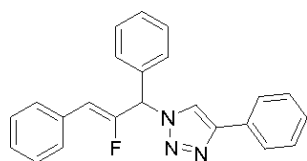

**(Z)-1-(2-fluoro-1,3-diphenylallyl)-4-phenyl-1H-1,2,3-triazole (6a)** : According to the general procedure, 5-phenyl-1H-1,2,3-triazole **5a** (40 mg, 276  $\mu$ mol), selectfluor (195 mg, 551  $\mu$ mol) and diaryl allene (132 mg, 689  $\mu$ mol) provided **6a** as a creamish solid (61 mg, 62%) after flash column chromatography (10% ethyl acetate in petroleum ether);  $R_f = 0.50$  (20% ethyl acetate in petroleum ether),  $^1\text{H NMR}$  (400 MHz, Chloroform-*d*)  $\delta$  7.81 – 7.75 (m, 2H), 7.44 (d,  $J = 7.2$  Hz, 2H), 7.37 – 7.20 (m, 12H), 6.62 (d,  $J = 16.6$  Hz, 1H), 5.79 (d,  $J = 38.0$  Hz, 1H);  $^{13}\text{C NMR}$  (100 MHz, Chloroform-*d*)  $\delta$  154.1 (d,  $J = 269.1$  Hz), 148.2, 134.7, 131.7, 129.3, 129.2, 128.9, 128.8, 128.5, 127.5, 125.9, 119.5, 112.4 (d,  $J = 6.1$  Hz), 66.1 (d,  $J = 28.6$  Hz);  $^{19}\text{F NMR}$  (373 MHz, Chloroform-*d*)  $\delta$  -112.44 (d,  $J = 35.5$  Hz); HRMS calculated for  $\text{C}_{23}\text{H}_{19}\text{FN}_3^+$   $[\text{M}+\text{H}]^+$  : 356.1563; found 356.1567; IR (liquid): 3063, 2924, 1955, 1689, 1451, 1156, 763  $\text{cm}^{-1}$ .

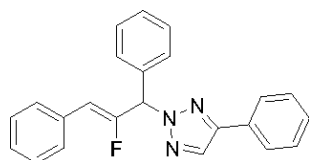

**(Z)-2-(2-fluoro-1,3-diphenylallyl)-4-phenyl-2H-1,2,3-triazole (6a')** : According to the general procedure, 5-phenyl-1H-1,2,3-triazole **5a** (40 mg, 276  $\mu$ mol), selectfluor (195 mg, 551  $\mu$ mol) and diaryl allene (132 mg, 689  $\mu$ mol) provided **6a'** as a yellow oil (20 mg, 20%) after flash column chromatography (20% DCM in petroleum ether);  $R_f = 0.40$  (5% ethyl acetate in petroleum ether),  $^1\text{H NMR}$  (400 MHz, Chloroform-*d*)  $\delta$  7.89 (s, 1H), 7.74 (d,  $J = 8.5$  Hz, 2H), 7.44 – 7.19 (m, 13H), 6.55 (d,  $J = 9.5$  Hz, 1H), 5.59 (d,  $J = 37.9$  Hz, 1H);  $^{13}\text{C NMR}$  (100 MHz, Chloroform-*d*)  $\delta$  155.5 (d,  $J = 269.7$  Hz), 148.5, 134.9, 132.3, 131.9, 130.2, 129.2, 129.1, 129.0, 128.7, 128.6, 128.2, 128.1, 126.2, 111.7 (d,  $J = 6.5$  Hz), 70.1 (d,  $J = 29.8$  Hz);  $^{19}\text{F NMR}$  (373 MHz, Chloroform-*d*)  $\delta$  -109.37 (d,  $J = 43.6$  Hz); HRMS calculated for  $\text{C}_{23}\text{H}_{19}\text{FN}_3^+$   $[\text{M}+\text{H}]^+$  : 356.1563; found 356.1560. IR (liquid): 3064, 2853, 1602, 1432, 972, 754  $\text{cm}^{-1}$ .

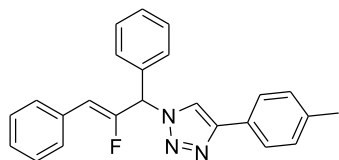

**(Z)-1-(2-fluoro-1,3-diphenylallyl)-4-p-tolyl-1H-1,2,3-triazole (6b)** : According to the general procedure, triazole **5b** (40 mg, 251  $\mu$ mol), selectfluor (178 mg, 503  $\mu$ mol) and diaryl allene (121 mg, 628  $\mu$ mol) provided **6b** as a white solid (66 mg, 71%) after flash column chromatography (8% ethyl acetate in petroleum ether);  $R_f = 0.60$  (20% ethyl acetate in petroleum ether);  $^1\text{H NMR}$  (500 MHz, Chloroform-*d*)  $\delta$  7.76 (s, 1H), 7.66 (d,  $J = 8.1$  Hz, 2H), 7.45 (d,  $J = 7.3$  Hz, 2H), 7.35 (d,  $J = 7.1$  Hz, 3H), 7.27 (dt,  $J = 13.9, 6.2$  Hz, 5H), 7.15 (d,  $J = 7.9$  Hz, 2H), 6.62 (d,  $J = 16.5$  Hz, 1H), 5.78 (d,  $J = 37.9$  Hz, 1H), 2.30 (s, 3H) ;  $^{13}\text{C NMR}$  (125 MHz, Chloroform-*d*)  $\delta$  154.2 (d,  $J = 269.1$  Hz), 148.3, 138.3, 134.8, 131.8, 129.7, 129.4, 129.4, 129.3, 129.2, 128.8, 128.6, 127.6, 125.8, 119.0, 112.4 (d,  $J = 6.1$  Hz), 66.1 (d,  $J = 28.7$  Hz), 21.4;  $^{19}\text{F NMR}$  (373 MHz, Chloroform-*d*)  $\delta$  -112.4 (dd,  $J = 39.5, 17.2$  Hz); HRMS calculated for

$C_{24}H_{21}FN_3^+$   $[M+H]^+$  : 370.1720; found 370.1722. IR (liquid): 3029, 2924, 1688, 1496, 1450, 1039, 694  $cm^{-1}$ .

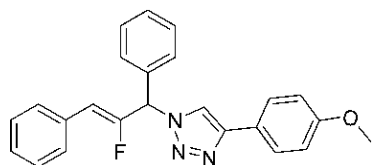

**(Z)-1-(2-fluoro-1,3-diphenylallyl)-4-(4-methoxyphenyl)-1H-1,2,3-triazole (6c)** :

According to the general procedure, triazole **5c** (40 mg, 228  $\mu$ mol), selectfluor (162 mg, 457  $\mu$ mol) and diaryl allene (110 mg, 571  $\mu$ mol) provided **6c** as a white solid (62 mg, 71%) after flash column chromatography (10 % ethyl acetate in petroleum ether);  $R_f$  = 0.38 (20% ethyl acetate in petroleum ether);  $^1H$  NMR (500 MHz, Chloroform-*d*)  $\delta$  7.71 (d,  $J$  = 2.1 Hz, 3H), 7.45 (d,  $J$  = 7.5 Hz, 2H), 7.38 – 7.31 (m, 3H), 7.26 (dq,  $J$  = 12.8, 7.4 Hz, 5H), 6.87 (d,  $J$  = 8.7 Hz, 2H), 6.61 (d,  $J$  = 16.5 Hz, 1H), 5.78 (d,  $J$  = 38.0 Hz, 1H), 3.76 (s, 3H);  $^{13}C$  NMR (125 MHz, Chloroform-*d*)  $\delta$  159.9, 154.2 (d,  $J$  = 269.0 Hz), 148.1, 134.8, 131.8, 129.4 (d,  $J$  = 4.3 Hz), 129.3, 129.2, 128.8, 128.5, 127.6, 127.3, 123.2, 118.6, 114.4, 112.3 (d,  $J$  = 6.2 Hz), 66.1 (d,  $J$  = 28.6 Hz), 55.5 ;  $^{19}F$  NMR (373 MHz, Chloroform-*d*)  $\delta$  -111.6 (d,  $J$  = 26.6 Hz) ; HRMS calculated for  $C_{24}H_{21}FN_3O^+$   $[M+H]^+$  : 386.1669; found 386.1663; IR (liquid): 3032, 2838, 1615, 1496, 721  $cm^{-1}$ .

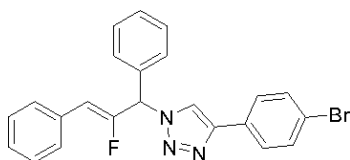

**(Z)-4-(4-bromophenyl)-1-(2-fluoro-1,3-diphenylallyl)-1H-1,2,3-triazole (6d)** :

According to the general procedure, triazole **5d** (40 mg, 179  $\mu$ mol), selectfluor (126 mg, 357  $\mu$ mol) and diaryl allene (86 mg, 446  $\mu$ mol) provided **6d** as a white solid (57 mg, 74%) after flash column chromatography (10 % ethyl acetate in petroleum ether);  $R_f$  = 0.56 (20% ethyl acetate in petroleum ether);  $^1H$  NMR (400 MHz, Chloroform-*d*)  $\delta$  7.80 (s, 1H), 7.65 (d,  $J$  = 8.3 Hz, 2H), 7.51 – 7.42 (m, 4H), 7.35 – 7.27 (m, 5H), 7.25 – 7.23 (m, 3H), 6.62 (d,  $J$  = 17.0 Hz, 1H), 5.80 (d,  $J$  = 38.0 Hz, 1H);  $^{13}C$  NMR (100 MHz, Chloroform-*d*)  $\delta$  153.9 (d,  $J$  = 268.8 Hz), 147.2, 134.6, 132.1, 131.6, 129.5, 129.4, 129.3, 129.2, 128.8, 128.6, 127.5, 127.5, 122.4, 119.5 (d,  $J$  = 2.1 Hz), 112.6 (d,  $J$  = 6.3 Hz), 66.2 (d,  $J$  = 28.3 Hz);  $^{19}F$  NMR (373 MHz, Chloroform-*d*)  $\delta$  -112.7 (dd,  $J$  = 38.8, 16.7 Hz); HRMS calculated for  $C_{23}H_{18}BrFN_3^+$   $[M+H]^+$  : 434.0668; found 434.0668; IR (liquid): 3031, 2923, 1954, 1903, 1602, 1450, 1232, 1131, 755  $cm^{-1}$ .

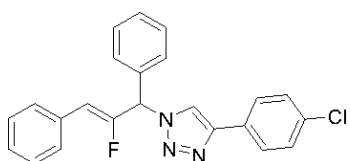

**(Z)-4-(4-chlorophenyl)-1-(2-fluoro-1,3-diphenylallyl)-1H-1,2,3-triazole (6e)** :

According to the general procedure, triazole **5e** (40 mg, 223  $\mu$ mol), selectfluor (158 mg, 445  $\mu$ mol) and diaryl allene (107 mg, 557  $\mu$ mol) provided **6e** as a white solid (58 mg, 67%) after flash column chromatography (10% ethyl acetate in petroleum ether);  $R_f$  = 0.55 (20% ethyl acetate in petroleum ether);  $^1H$  NMR (500 MHz, Chloroform-*d*)  $\delta$  7.79 (s, 1H), 7.70 (d,  $J$  = 8.5 Hz, 2H), 7.44 (d,  $J$  = 7.5 Hz, 2H), 7.36 – 7.32 (m, 3H), 7.33 – 7.19 (m, 7H), 6.61 (d,  $J$  = 16.8 Hz, 1H), 5.79 (d,  $J$  = 38.0 Hz, 1H);  $^{13}C$  NMR (125 MHz, Chloroform-*d*)  $\delta$  154.0 (d,  $J$  = 268.8 Hz), 147.2, 134.6, 134.2, 132.2 – 130.9 (m), 129.5, 129.4, 129.3, 129.2, 129.0, 128.8, 128.6, 127.5, 127.2, 119.5, 112.6 (d,  $J$  = 6.2 Hz), 66.2 (d,  $J$  = 28.4 Hz) ;  $^{19}F$  NMR (373 MHz, Chloroform-*d*)  $\delta$  -111.8 – -112.0 (m) HRMS calculated for  $C_{23}H_{18}ClFN_3^+$   $[M+H]^+$  : 390.1173; found 390.1171 ; IR (liquid): 3381, 3029, 1601, 1450, 1153, 754, 695  $cm^{-1}$ .

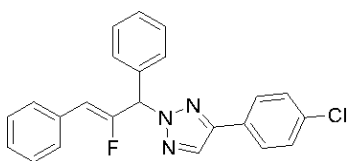

**(Z)-4-(4-chlorophenyl)-2-(2-fluoro-1,3-diphenylallyl)-2H-1,2,3-triazole (6e')** :

According to the general procedure, triazole **5e** (40 mg, 223  $\mu$ mol), selectfluor (158 mg, 445  $\mu$ mol) and diaryl allene (107 mg, 557  $\mu$ mol) provided **6e'** as a yellow oil (18 mg, 20%) after flash column chromatography (20% DCM in petroleum ether);  $R_f$  = 0.40 (5 % ethyl acetate in petroleum ether);  $^1H$  NMR (500 MHz, Chloroform-*d*)  $\delta$  7.86 (s, 1H), 7.67 (d,  $J$  = 8.6 Hz, 2H), 7.44 – 7.22 (m, 12H),

6.54 (d,  $J = 9.6$  Hz, 1H), 5.59 (d,  $J = 37.9$  Hz, 1H);  $^{13}\text{C}$  NMR (100 MHz, Chloroform- $d$ )  $\delta$  155.3 (d,  $J = 269.8$  Hz), 147.5, 134.8, 134.6, 131.9, 129.3, 129.2, 129.2, 129.0, 128.8, 128.6, 128.2, 128.2, 127.5, 111.9 (d,  $J = 6.4$  Hz), 70.3 (d,  $J = 29.7$  Hz);  $^{19}\text{F}$  NMR (373 MHz, Chloroform- $d$ )  $\delta$  -109.5 (d,  $J = 36.9$  Hz); HRMS calculated for  $\text{C}_{23}\text{H}_{18}\text{ClFN}_3^+$   $[\text{M}+\text{H}]^+$ : 390.1173; found 390.1176; IR (liquid): 3363, 2921, 1600, 1452, 1260, 1093, 696  $\text{cm}^{-1}$ .

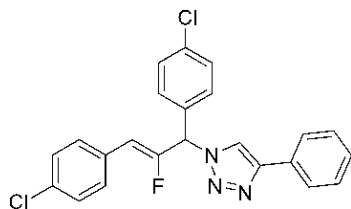

**(Z)-1-(1,3-bis(4-chlorophenyl)-2-fluoroallyl)-4-phenyl-1H-**

**1,2,3-triazole (6f):** According to the general procedure, triazole **5a** (40 mg, 276  $\mu\text{mol}$ ), selectfluor (195 mg, 551  $\mu\text{mol}$ ) and diaryl allene (180 mg, 689  $\mu\text{mol}$ ) provided **6f** as a yellow solid (76 mg, 65%) after flash column chromatography (60% DCM in petroleum ether);  $R_f = 0.52$  (20% ethyl acetate in petroleum ether);  $^1\text{H}$  NMR (500 MHz, Chloroform- $d$ )  $\delta$  7.9 – 7.8 (m, 1H),

7.72 (d,  $J = 8.1$  Hz, 1H), 7.43 (dd,  $J = 18.5, 8.7$  Hz, 6H), 7.32 (d,  $J = 8.5$  Hz, 3H), 7.29 – 7.18 (m, 3H), 6.63 (d,  $J = 16.3$  Hz, 1H), 5.82 (d,  $J = 37.4$  Hz, 1H);  $^{13}\text{C}$  NMR (100 MHz, Chloroform- $d$ )  $\delta$  154.0 (d,  $J = 269.4$  Hz), 148.4, 138.5, 135.7, 132.9, 130.5, 130.4, 130.2, 129.6, 129.0, 129.0, 128.9, 128.6, 125.9, 119.3, 111.0 (d,  $J = 6.4$  Hz), 65.4 (d,  $J = 28.5$  Hz);  $^{19}\text{F}$  NMR (373 MHz, Chloroform- $d$ )  $\delta$  -111.3 (q,  $J = 28.4, 23.9$  Hz); HRMS calculated for  $\text{C}_{23}\text{H}_{17}\text{Cl}_2\text{FN}_3^+$   $[\text{M}+\text{H}]^+$ : 424.0784, found 424.0789; IR (liquid): 3064, 2925, 1904, 1432, 1135, 754  $\text{cm}^{-1}$ .

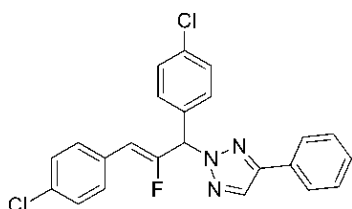

**(Z)-2-(1,3-bis(4-chlorophenyl)-2-fluoroallyl)-4-phenyl-2H-**

**1,2,3-triazole (6f')**: According to the general procedure, triazole **5a** (40 mg, 276  $\mu\text{mol}$ ), selectfluor (195 mg, 551  $\mu\text{mol}$ ) and diaryl allene (180 mg, 689  $\mu\text{mol}$ ) provided **6f'** as a yellow oil (18 mg, 15%) after flash column chromatography (20% DCM in petroleum ether);  $R_f = 0.38$  (5% ethyl acetate in petroleum ether);  $^1\text{H}$  NMR (400 MHz, Chloroform- $d$ )  $\delta$  7.89 (s, 1H), 7.73

(d,  $J = 7.2$  Hz, 2H), 7.38 – 7.29 (m, 9H), 7.23 – 7.21 (m, 2H), 6.50 (d,  $J = 9.2$  Hz, 1H), 5.53 (d,  $J = 37.3$  Hz, 1H);  $^{13}\text{C}$  NMR (125 MHz, Chloroform- $d$ )  $\delta$  155.5 (d,  $J = 270.3$  Hz), 148.8, 135.4, 134.0, 133.2, 132.2, 130.5, 130.4, 130.0, 129.7, 129.3, 129.1, 128.9, 128.9, 126.2, 110.7 (d,  $J = 6.3$  Hz), 69.3 (d,  $J = 30.4$  Hz).  $^{19}\text{F}$  NMR (373 MHz, Chloroform- $d$ )  $\delta$  -108.1 (d,  $J = 37.4$  Hz); HRMS calculated for  $\text{C}_{23}\text{H}_{17}\text{Cl}_2\text{FN}_3^+$   $[\text{M}+\text{H}]^+$ : 424.0784, found 424.0784; IR (liquid) 2920, 2850, 1727, 1492, 1092, 800  $\text{cm}^{-1}$ .

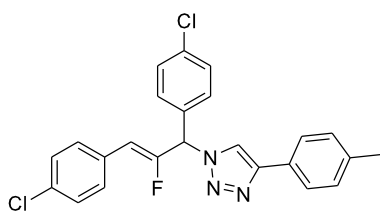

**(Z)-1-(1,3-bis(4-chlorophenyl)-2-fluoroallyl)-4-p-tolyl-1H-**

**1,2,3-triazole (6g)**: According to the general procedure, triazole **5b** (40 mg, 251  $\mu\text{mol}$ ), selectfluor (178 mg, 503  $\mu\text{mol}$ ) and diaryl allene (164 mg, 628  $\mu\text{mol}$ ) provided **6g** as a yellow solid (62 mg, 71%) after flash column chromatography (10% ethyl acetate in petroleum ether);  $R_f = 0.52$  (20% ethyl acetate in petroleum ether);  $^1\text{H}$  NMR (400 MHz, Chloroform- $d$ )  $\delta$  7.72

(d,  $J = 0.8$  Hz, 1H), 7.66 (d,  $J = 8.1$  Hz, 2H), 7.36 (dd,  $J = 15.6, 8.6$  Hz, 3H), 7.26 (d,  $J = 8.6$  Hz, 2H), 7.18 (dd,  $J = 12.8, 8.2$  Hz, 5H), 6.56 (d,  $J = 16.3$  Hz, 1H), 5.74 (d,  $J = 37.4$  Hz, 1H), 2.31 (s, 3H);  $^{13}\text{C}$  NMR (125 MHz, Chloroform- $d$ )  $\delta$  154.2 (d,  $J = 269.8$  Hz), 148.6, 138.5, 135.7, 134.5, 133.2, 130.5, 130.5, 129.7, 129.7, 129.0, 129.0, 127.4, 125.9, 118.9, 111.6, 65.4 (d,  $J = 29.0$  Hz), 21.5;  $^{19}\text{F}$  NMR (373 MHz, Chloroform- $d$ )  $\delta$  -112.0 (d,  $J = 17.2$  Hz); HRMS calculated for  $\text{C}_{24}\text{H}_{19}\text{Cl}_2\text{FN}_3^+$   $[\text{M}+\text{H}]^+$ : 438.0940; found 438.0949; IR (liquid): 2960, 1905, 1455, 754  $\text{cm}^{-1}$ .

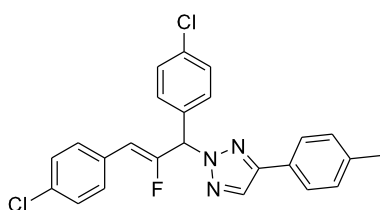

**(Z)-2-(1,3-bis(4-chlorophenyl)-2-fluoroallyl)-4-p-tolyl-2H-**

**1,2,3-triazole (6g')**: According to the general procedure, triazole **5b** (40 mg, 251  $\mu\text{mol}$ ), selectfluor (178 mg, 503  $\mu\text{mol}$ ) and diaryl allene (164 mg, 628  $\mu\text{mol}$ ) provided **6g'** as a yellow oil (20 mg, 18%) after flash column chromatography (20% DCM in petroleum ether);  $R_f = 0.47$  (5% ethyl acetate

in petroleum ether);  $^1\text{H}$  NMR (500 MHz, Chloroform-*d*)  $\delta$  7.85 (s, 1H), 7.61 (d,  $J = 8.1$  Hz, 2H), 7.36 – 7.31 (m, 6H), 7.22 (d,  $J = 8.6$  Hz, 2H), 7.16 (d,  $J = 7.9$  Hz, 2H), 6.49 (d,  $J = 9.2$  Hz, 1H), 5.53 (d,  $J = 37.3$  Hz, 1H), 2.31 (s, 3H);  $^{19}\text{F}$  NMR (373 MHz, Chloroform-*d*)  $\delta$  -108.0 (d,  $J = 36.4$  Hz); HRMS calculated for  $\text{C}_{24}\text{H}_{19}\text{Cl}_2\text{FN}_3^+$   $[\text{M}+\text{H}]^+$ : 438.0940; found 438.0947; IR (liquid): 2924, 1900, 1690, 754  $\text{cm}^{-1}$ .

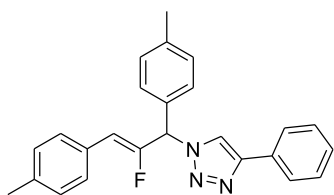

**(Z)-1-(2-fluoro-1,3-dip-tolylallyl)-4-phenyl-1H-1,2,3-triazole (6h)**

: According to the general procedure, triazole **5a** (40 mg, 276  $\mu\text{mol}$ ), selectfluor (195 mg, 551  $\mu\text{mol}$ ) and diaryl allene (152 mg, 689  $\mu\text{mol}$ ) provided **6h** as a yellow oil (28 mg, 26%) after flash column chromatography (10% ethyl acetate in petroleum ether);  $R_f = 0.55$  (20% ethyl acetate in petroleum ether);  $^1\text{H}$  NMR (400 MHz, Chloroform-*d*)  $\delta$  7.77 (d,  $J = 8.6$  Hz, 3H), 7.38 – 7.30 (m, 4H), 7.25 (t,  $J = 7.3$  Hz, 1H), 7.14 (s, 4H), 7.08 (d,  $J = 7.9$  Hz, 2H), 6.57 (d,  $J = 16.3$  Hz, 1H), 5.73 (d,  $J = 38.3$  Hz, 1H), 2.30 (s, 3H), 2.27 (s, 3H);  $^{13}\text{C}$  NMR (125 MHz, Chloroform-*d*)  $\delta$  153.8 (d,  $J = 267.8$  Hz), 148.1, 139.4, 138.5, 131.9, 130.6, 130.0, 129.5, 129.2, 129.1, 129.0, 128.4, 127.5, 125.9, 119.4, 112.0 (d,  $J = 6.4$  Hz), 66.0 (d,  $J = 28.7$  Hz), 21.4, 21.3;  $^{19}\text{F}$  NMR (373 MHz, Chloroform-*d*)  $\delta$  -113.4 (dd,  $J = 36.9, 14.9$  Hz); HRMS calculated for  $\text{C}_{25}\text{H}_{23}\text{FN}_3^+$   $[\text{M}+\text{H}]^+$ : 384.1876, found 384.1870; IR (liquid): 3028, 2922, 1688, 1513, 764  $\text{cm}^{-1}$ .

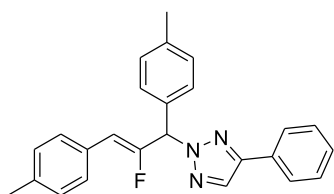

**(Z)-2-(2-fluoro-1,3-dip-tolylallyl)-4-phenyl-2H-1,2,3-triazole (6h')**

: According to the general procedure, triazole **5a** (40 mg, 276  $\mu\text{mol}$ ), selectfluor (195 mg, 551  $\mu\text{mol}$ ) and diaryl allene (152 mg, 689  $\mu\text{mol}$ ) provided **6h'** as a white solid (66 mg, 62 %) after flash column chromatography (2.5% ethyl acetate in petroleum ether);  $R_f = 0.44$  (5% ethyl acetate in petroleum ether);  $^1\text{H}$  NMR (400 MHz, Chloroform-*d*)  $\delta$  7.87 (s, 1H), 7.73 (d,  $J = 7.3$  Hz, 2H), 7.38 – 7.25 (m, 7H), 7.13 (d,  $J = 8.0$  Hz, 2H), 7.04 (d,  $J = 8.0$  Hz, 2H), 6.50 (d,  $J = 9.3$  Hz, 1H), 5.55 (d,  $J = 38.2$  Hz, 1H), 2.29 (s, 3H), 2.25 (s, 3H);  $^{13}\text{C}$  NMR (125 MHz, Chloroform-*d*)  $\delta$  155.1 (d,  $J = 268.5$  Hz), 148.4, 139.0, 138.0, 132.1, 131.8, 130.4, 129.7, 129.3, 129.1, 129.0, 129.0, 128.7, 128.2, 126.2, 111.3, 70.0 (d,  $J = 30.1$  Hz), 21.4, 21.4;  $^{19}\text{F}$  NMR (373 MHz, Chloroform-*d*)  $\delta$  -110.5 (d,  $J = 47.5$  Hz).; HRMS calculated for  $\text{C}_{25}\text{H}_{23}\text{FN}_3^+$   $[\text{M}+\text{H}]^+$ : 384.1876, found 384.1877; IR (liquid): 2919, 1689, 1458, 1135, 768  $\text{cm}^{-1}$ .

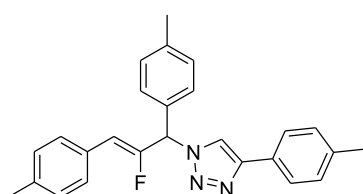

**(Z)-1-(2-fluoro-1,3-dip-tolylallyl)-4-p-tolyl-1H-1,2,3-triazole (6i)**

: According to the general procedure, triazole **5b** (40 mg, 251  $\mu\text{mol}$ ) and selectfluor (178 mg, 503  $\mu\text{mol}$ ) and Diaryl allene (138 mg, 628  $\mu\text{mol}$ ) provided **6i** as a yellow oil (28 mg, 28%) after flash column chromatography (10 % ethyl acetate in petroleum ether);  $R_f = 0.51$  (20% ethyl acetate in petroleum ether);  $^1\text{H}$  NMR (400 MHz, Chloroform-*d*)  $\delta$  7.74 (s, 1H), 7.66 (d,  $J = 8.1$  Hz, 2H), 7.34 (d,  $J = 8.2$  Hz, 2H), 7.15 (d,  $J = 6.9$  Hz, 6H), 7.09 (d,  $J = 8.1$  Hz, 2H), 6.57 (d,  $J = 16.2$  Hz, 1H), 5.73 (d,  $J = 38.3$  Hz, 1H), 2.30 (s, 3H), 2.28 (s, 3H), 2.25 (s, 3H);  $^{13}\text{C}$  NMR (125 MHz, Chloroform-*d*)  $\delta$  153.8 (d,  $J = 267.6$  Hz), 148.2, 139.4, 138.5, 138.3, 131.9, 130.0, 129.6, 129.5, 129.1, 129.1, 127.8, 127.5, 125.8, 119.0, 112.1 – 111.7 (m), 65.9 (d,  $J = 28.5$  Hz), 21.5, 21.3;  $^{19}\text{F}$  NMR (373 MHz, Chloroform-*d*)  $\delta$  -113.2 (d,  $J = 28.7$  Hz); HRMS calculated for  $\text{C}_{26}\text{H}_{25}\text{FN}_3^+$   $[\text{M}+\text{H}]^+$ : 398.2033; found 398.2035; IR (liquid): 3064, 2850, 1602, 1451, 1116, 726  $\text{cm}^{-1}$ .

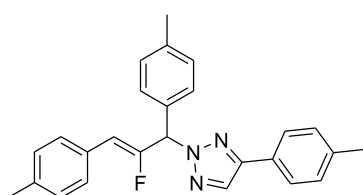

**(Z)-2-(2-fluoro-1,3-dip-tolylallyl)-4-p-tolyl-2H-1,2,3-triazole (6i')**

: According to the general procedure, triazole **5b** (40 mg, 251  $\mu\text{mol}$ ) and selectfluor (178 mg, 503  $\mu\text{mol}$ ) and Diaryl allene (138 mg, 628  $\mu\text{mol}$ ) provided **6i'** as a cream coloured solid (62 mg, 62%) after flash column chromatography (2.5% ethyl acetate in petroleum ether);  $R_f = 0.46$  (5% ethyl acetate in petroleum ether);  $^1\text{H}$  NMR (400 MHz, Chloroform-*d*)  $\delta$  7.83 (s, 1H), 7.62 (d,  $J = 7.9$  Hz, 2H), 7.29 (dd,  $J = 11.0, 8.2$  Hz, 4H), 7.13 (t,  $J = 7.3$  Hz, 4H), 7.04 (d,  $J = 7.9$  Hz,

2H), 6.48 (d,  $J = 9.3$  Hz, 1H), 5.54 (d,  $J = 38.2$  Hz, 1H), 2.30 (s, 3H), 2.28 (s, 3H), 2.25 (s, 3H);  $^{13}\text{C}$  NMR (100 MHz, Chloroform- $d$ )  $\delta$  155.2 (d,  $J = 268.9$  Hz), 148.4, 139.0, 138.6, 137.9, 132.2, 132.1, 131.7, 129.6, 129.3, 129.1, 129.0, 128.2, 127.5, 126.1, 111.3 (d,  $J = 6.6$  Hz), 69.9 (d,  $J = 30.0$  Hz), 21.5, 21.4, 21.4;  $^{19}\text{F}$  NMR (373 MHz, Chloroform- $d$ )  $\delta$  -110.3 (d,  $J = 36.9$  Hz); HRMS calculated for  $\text{C}_{26}\text{H}_{25}\text{FN}_3^+$  [ $\text{M}+\text{H}$ ] $^+$  : 398.2033; found 398.2037; IR (liquid) : 3027, 2921, 1907, 1513, 1135, 819  $\text{cm}^{-1}$ .

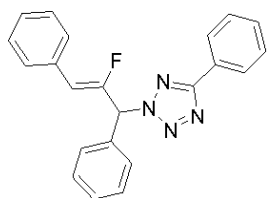

**(Z)-2-(2-fluoro-1,3-diphenylallyl)-5-phenyl-2H-tetrazole (8a) :**

According to the general procedure, tetrazole **7a** (40 mg, 274  $\mu\text{mol}$ ), selectfluor (194 mg, 547  $\mu\text{mol}$ ) and diaryl allene (132 mg, 684  $\mu\text{mol}$ ) provided **8a** as a yellow solid (82 mg, 84%) after flash column chromatography (2.5 % ethyl acetate in petroleum ether);  $R_f = 0.38$  (5% ethyl acetate in petroleum ether);  $^1\text{H}$  NMR (400 MHz, Chloroform- $d$ )  $\delta$  8.18 – 8.00 (m, 2H), 7.47 – 7.31 (m, 10H), 7.29 – 7.16 (m, 3H), 6.77

(d,  $J = 9.6$  Hz, 1H), 5.67 (d,  $J = 37.4$  Hz, 1H);  $^{13}\text{C}$  NMR (100 MHz, Chloroform- $d$ )  $\delta$  165.6, 153.9 (d,  $J = 269.7$  Hz), 133.3, 131.8, 130.6, 129.7, 129.3, 129.2, 129.0, 128.7, 128.5, 128.3, 127.3, 127.2, 112.7 (d,  $J = 6.3$  Hz), 69.0 (d,  $J = 29.7$  Hz);  $^{19}\text{F}$  NMR (373 MHz, Chloroform- $d$ )  $\delta$  -110.5 (d,  $J = 38.7$  Hz); HRMS calculated for  $\text{C}_{22}\text{H}_{17}\text{NaFN}_4^+$  [ $\text{M}+\text{Na}$ ] $^+$  : 379.1335; found 379.1336; IR (liquid): 3032, 1956, 1689, 1466, 1135, 732  $\text{cm}^{-1}$ .

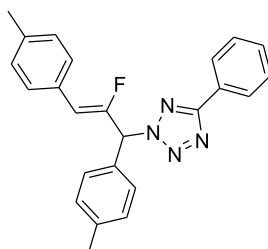

**(Z)-2-(2-fluoro-1,3-dip-tolylallyl)-5-phenyl-2H-tetrazole (8b) :**

According to the general procedure, tetrazole **7a** (40 mg, 274  $\mu\text{mol}$ ), selectfluor (194 mg, 547  $\mu\text{mol}$ ) and diaryl allene (151 mg, 684  $\mu\text{mol}$ ) provided **8b** as a yellow solid (92 mg, 87%) after flash column chromatography (2.5 % ethyl acetate in petroleum ether);  $R_f = 0.43$  (5% ethyl acetate in petroleum ether),  $^1\text{H}$  NMR (500 MHz, Chloroform- $d$ )  $\delta$  8.10 (dd,  $J = 7.5, 2.1$  Hz, 2H), 7.42 – 7.36 (m, 3H), 7.31 (dd,  $J = 11.8, 8.2$  Hz, 4H), 7.15 (d,  $J = 8.0$  Hz, 2H), 7.05 (d,  $J = 8.0$  Hz, 2H), 6.72 (d,  $J = 9.4$

Hz, 1H), 5.64 (d,  $J = 37.7$  Hz, 1H), 2.29 (s, 3H), 2.25 (s, 3H);  $^{13}\text{C}$  NMR (100 MHz, Chloroform- $d$ )  $\delta$  165.5, 153.5 (d,  $J = 268.6$  Hz), 139.7, 138.4, 130.5, 129.9, 129.4, 129.2, 129.1, 129.0, 129.0, 128.3, 127.4, 127.2, 112.4 (d,  $J = 6.5$  Hz), 68.9 (d,  $J = 29.6$  Hz), 21.4, 21.4;  $^{19}\text{F}$  NMR (373 MHz, Chloroform- $d$ )  $\delta$  -110.8 (d,  $J = 37.6$  Hz); HRMS calculated for  $\text{C}_{24}\text{H}_{22}\text{FN}_4^+$  [ $\text{M}+\text{H}$ ] $^+$  : 385.1828; found 385.1829; IR (liquid): 3030, 2922, 1908, 1690, 1449, 1134, 732  $\text{cm}^{-1}$ .

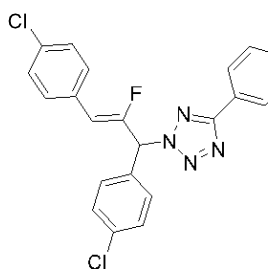

**(Z)-2-(1,3-bis(4-chlorophenyl)-2-fluoroallyl)-5-phenyl-2H-tetrazole (8c) :**

According to the general procedure, tetrazole **7a** (40 mg, 274  $\mu\text{mol}$ ), selectfluor (194 mg, 547  $\mu\text{mol}$ ) and diaryl allene (179 mg, 684  $\mu\text{mol}$ ) provided **8c** as a yellow oil (90 mg, 77%) after flash column chromatography (2.5 % ethyl acetate in petroleum ether);  $R_f = 0.40$  (5% ethyl acetate in petroleum ether);  $^1\text{H}$  NMR (500 MHz, Chloroform- $d$ )  $\delta$  8.12 – 8.07 (m, 2H), 7.43 – 7.38 (m, 5H), 7.34 (dd,  $J = 8.7, 2.0$  Hz, 4H), 7.23-7.21 (m, 2H), 6.73 (d,  $J = 9.6$  Hz, 1H), 5.63 (d,  $J =$

36.8 Hz, 1H);  $^{13}\text{C}$  NMR (100 MHz, Chloroform- $d$ ) 165.7, 153.8 (d,  $J = 270.5$  Hz), 136.0, 135.2 – 133.7 (m), 131.5 (d,  $J = 2.5$  Hz), 130.8, 130.5 (d,  $J = 7.6$  Hz), 130.1 (d,  $J = 2.6$  Hz), 129.8, 129.6, 129.0, 129.0, 127.1, 111.7 (d,  $J = 6.3$  Hz), 68.1 (d,  $J = 30.0$  Hz);  $^{19}\text{F}$  NMR (373 MHz, Chloroform- $d$ )  $\delta$  -110.1 (d,  $J = 29.4$  Hz); HRMS calculated for  $\text{C}_{44}\text{H}_{31}\text{Cl}_4\text{F}_2\text{N}_8^+$  [ $2\text{M}+\text{H}$ ] $^+$  : 849.1394; found 849.1393; IR (liquid): 3383, 2962, 1693, 1450, 1139, 758  $\text{cm}^{-1}$ .

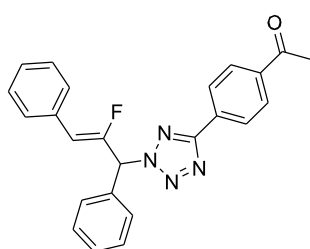

**(Z)-1-(4-(2-(2-fluoro-1,3-diphenylallyl)-2H-tetrazol-5-yl)phenyl)ethanone (8d) :**

According to the general procedure, tetrazole **7b** (40 mg, 213  $\mu\text{mol}$ ), selectfluor (151 mg, 425  $\mu\text{mol}$ ) and diaryl allene (102 mg, 531  $\mu\text{mol}$ ) provided **4p** as a white solid (81 mg, 95%) after flash column chromatography (2.5 % ethyl acetate in petroleum ether);  $R_f = 0.26$  (5% ethyl

acetate in petroleum;  $^1\text{H}$  NMR (400 MHz, Chloroform-*d*)  $\delta$  8.21 (d,  $J$  = 8.4 Hz, 2H), 7.99 (d,  $J$  = 8.4 Hz, 2H), 7.49 – 7.33 (m, 7H), 7.32 – 7.12 (m, 3H), 6.80 (d,  $J$  = 9.7 Hz, 1H), 5.69 (d,  $J$  = 37.4 Hz, 1H), 2.56 (s, 3H);  $^{13}\text{C}$  NMR (100 MHz, Chloroform-*d*)  $\delta$  197.6, 164.6, 153.7 (d,  $J$  = 269.5 Hz), 138.5, 133.1, 131.8 (d,  $J$  = 2.6 Hz), 131.5, 129.8, 129.3, 129.2, 129.0, 128.7, 128.6, 128.3, 127.3, 112.9 (d,  $J$  = 6.0 Hz), 69.2 (d,  $J$  = 29.3 Hz), 26.9;  $^{19}\text{F}$  NMR (373 MHz, Chloroform-*d*)  $\delta$  -110.7 (d,  $J$  = 38.3 Hz) ; HRMS calculated for  $\text{C}_{24}\text{H}_{18}\text{FN}_4\text{O}^+$  [M-H] $^+$  : 397.1465; found 397.1461 ; IR (liquid): 3029, 2850, 1954, 1423, 763  $\text{cm}^{-1}$ .

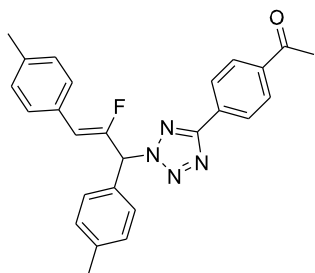

**(Z)-1-(4-(2-(2-fluoro-1,3-dip-tolylallyl)-2H-tetrazol-5-yl)phenyl)ethanone (8e)** :

According to the general procedure, tetrazole **7b** (40 mg, 213  $\mu\text{mol}$ ), selectfluor (151 mg, 425  $\mu\text{mol}$ ) and diaryl allene (117 mg, 531  $\mu\text{mol}$ ) provided **4q** as a yellow oil (72 mg, 80%) after flash column chromatography (2.5 % ethyl acetate in petroleum ether);  $R_f$  = 0.40 (5% ethyl acetate in petroleum);  $^1\text{H}$  NMR (400 MHz, Chloroform-*d*)  $\delta$  8.22 (d,  $J$  = 8.4 Hz, 2H), 8.00 (d,  $J$  = 8.4 Hz, 2H), 7.33 (dd,  $J$  = 9.9, 8.2 Hz, 4H), 7.17 (s, 2H), 7.07 (d,  $J$  = 8.0 Hz, 2H), 6.75 (d,  $J$  = 9.4 Hz, 1H), 5.66 (d,  $J$  = 37.7 Hz, 1H), 2.58 (s, 3H),

2.32 (s, 3H), 2.27 (s, 3H);  $^{13}\text{C}$  NMR (100 MHz, Chloroform-*d*)  $\delta$  197.7, 164.5, 153.3 (d,  $J$  = 268.3 Hz), 139.9, 138.5, 138.4, 131.6, 130.3, 130.0, 129.4, 129.2, 129.1, 129.0, 128.3, 127.3, 112.6 (d,  $J$  = 6.3 Hz), 69.1 (d,  $J$  = 29.2 Hz), 26.9, 21.4, 21.4;  $^{19}\text{F}$  NMR (373 MHz, Chloroform-*d*)  $\delta$  -111.8 (dd,  $J$  = 38.6, 10.6 Hz) ; HRMS calculated for  $\text{C}_{26}\text{H}_{22}\text{FN}_4\text{O}^+$  [M-H] $^+$  : 425.1772; found 425.1774; IR (liquid): 2963, 1687, 1418, 1261, 800, 762  $\text{cm}^{-1}$ .

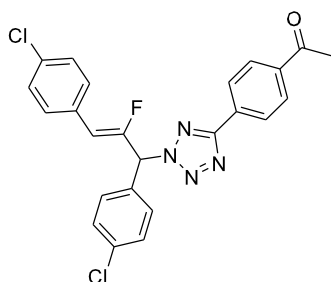

**(Z)-1-(4-(2-(1,3-bis(4-chlorophenyl)-2-fluoroallyl)-2H-tetrazol-5-yl)phenyl)ethanone (8f)** :

According to the general procedure, tetrazole **7b** (40 mg, 213  $\mu\text{mol}$ ), selectfluor (151 mg, 425  $\mu\text{mol}$ ) and diaryl allene (139 mg, 531  $\mu\text{mol}$ ) provided **8f** as a yellow oil (90 mg, 90%) after flash column chromatography (2.5 % ethyl acetate in petroleum ether);  $R_f$  = 0.26 (5 % ethyl acetate in petroleum);  $^1\text{H}$  NMR (400 MHz, Chloroform-*d*)  $\delta$  8.21 (d,  $J$  = 8.4 Hz, 2H), 8.00 (d,  $J$  = 8.4 Hz, 2H), 7.37 (dd,  $J$  = 13.3, 8.4 Hz, 6H), 7.21 (d,  $J$  = 17.6 Hz, 2H), 6.76 (d,  $J$  = 9.7 Hz, 1H), 5.65 (d,  $J$  = 36.8 Hz, 1H), 2.58 (s, 3H);  $^{13}\text{C}$

NMR (100 MHz, Chloroform-*d*)  $\delta$  197.6, 164.8, 153.6 (d,  $J$  = 270.7 Hz), 138.6, 136.2, 134.5, 131.4, 131.2, 130.6, 130.5, 130.0, 129.8, 129.7, 129.0, 127.3, 111.9 (d,  $J$  = 6.2 Hz), 68.4 (d,  $J$  = 29.6 Hz), 26.9;  $^{19}\text{F}$  NMR (373 MHz, Chloroform-*d*)  $\delta$  -109.6 (d,  $J$  = 36.7 Hz) ; HRMS calculated for  $\text{C}_{48}\text{H}_{35}\text{Cl}_4\text{F}_2\text{N}_8\text{O}_2^+$  [2M+H] $^+$  : 933.1605; found 933.1608; IR (liquid): 3355, 2925, 2185, 1907, 1466, 1150, 748  $\text{cm}^{-1}$ .

## References

- [1] M. L. Hossain, F. Ye, Y. Zhang, J. Wang, *The Journal of Organic Chemistry* **2013**, 78, 1236-1241.
- [2] a) S. Jana, A. Chakraborty, V. Z. Shirinian, A. Hajra, *Adv. Synth. Catal.* **2018**, 360, 2402-2408; b) X.-J. Quan, Z.-H. Ren, Y.-Y. Wang, Z.-H. Guan, *Org. Lett.* **2014**, 16, 5728-5731.
- [3] a) D. Amantini, R. Beleggia, F. Fringuelli, F. Pizzo, L. Vaccaro, *The Journal of Organic Chemistry* **2004**, 69, 2896-2898; b) B. Das, C. R. Reddy, D. N. Kumar, M. Krishnaiah, R. Narender, *Synlett* **2010**, 2010, 391-394.



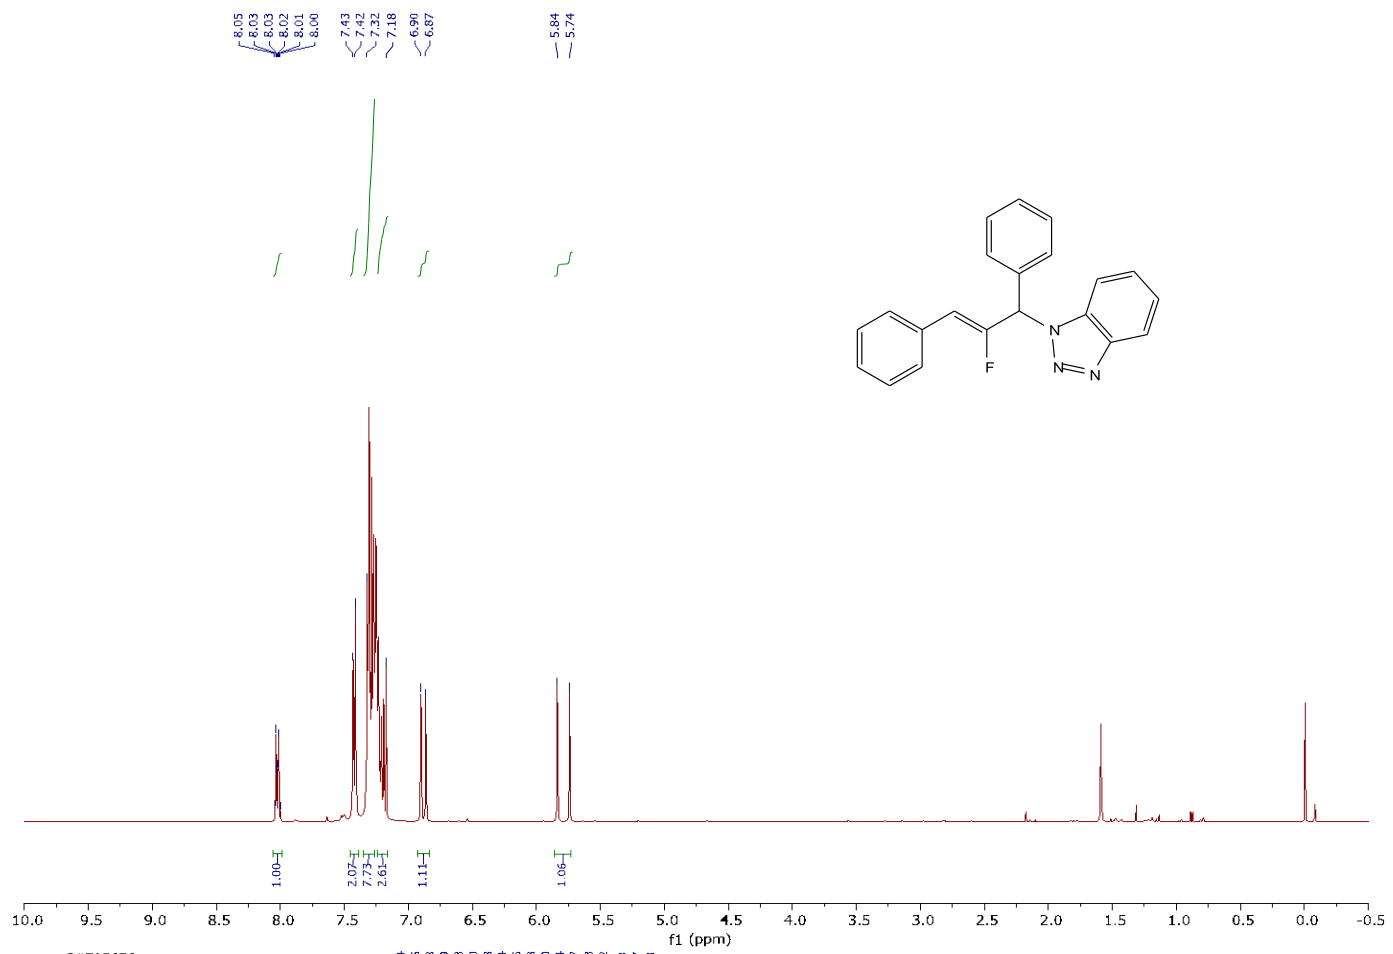

S#705676

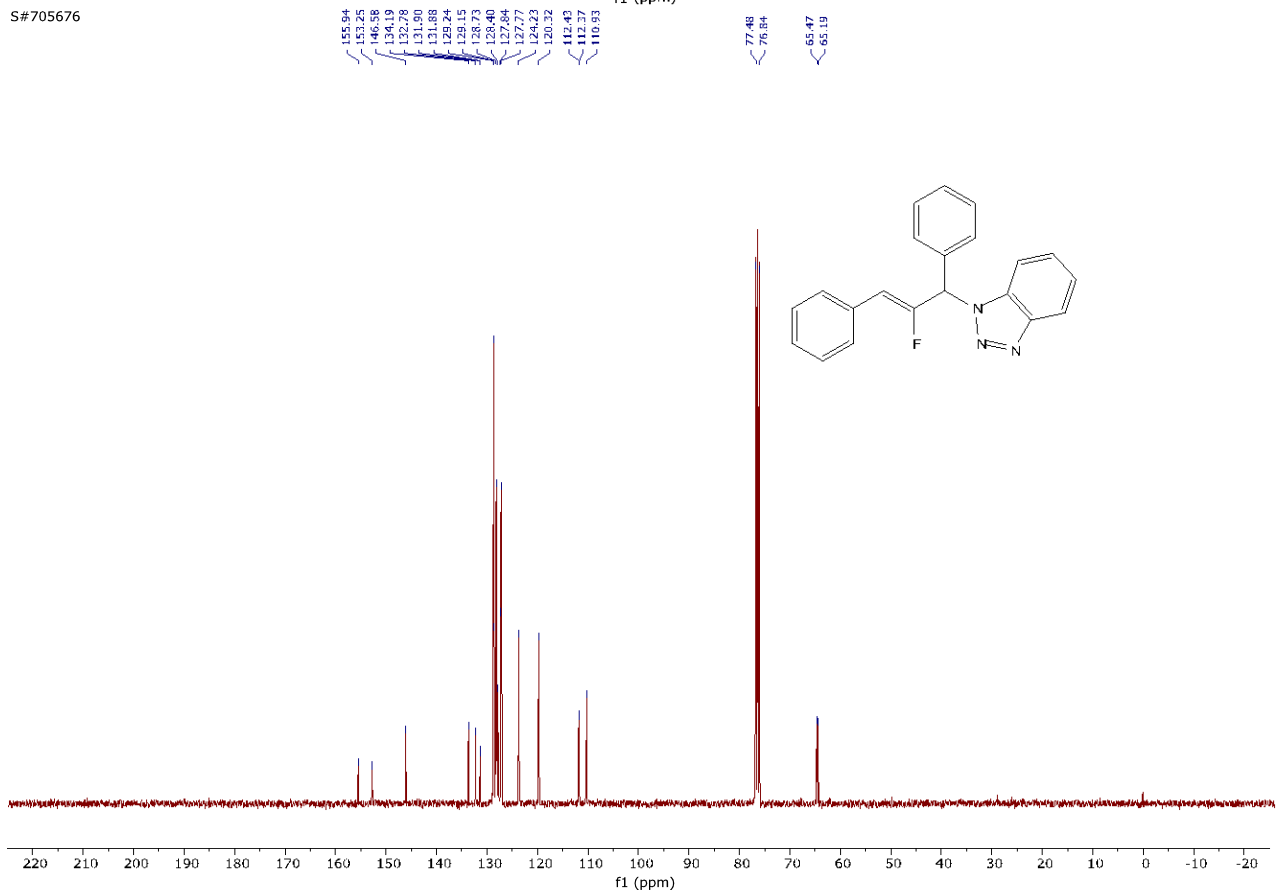

S#382452

-62.59

-108.90  
-108.98

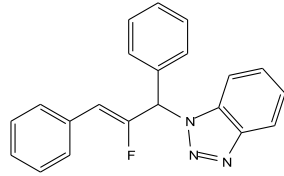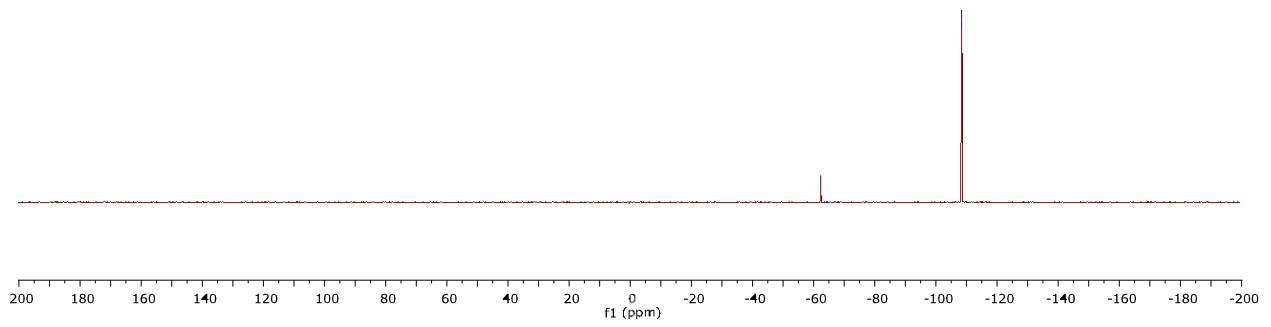

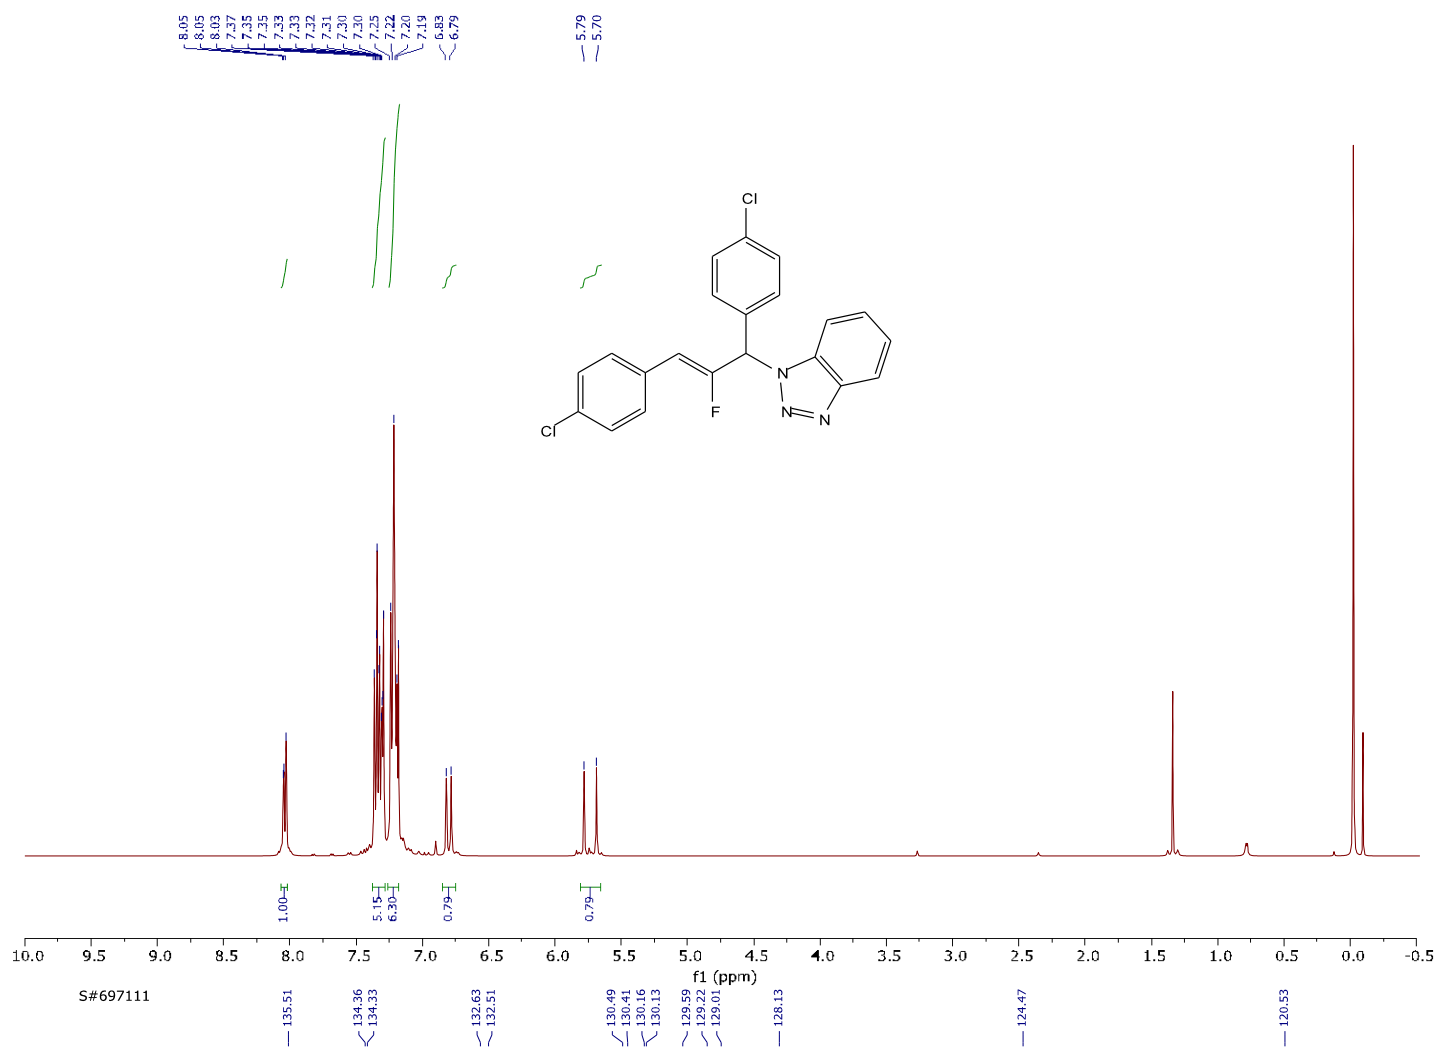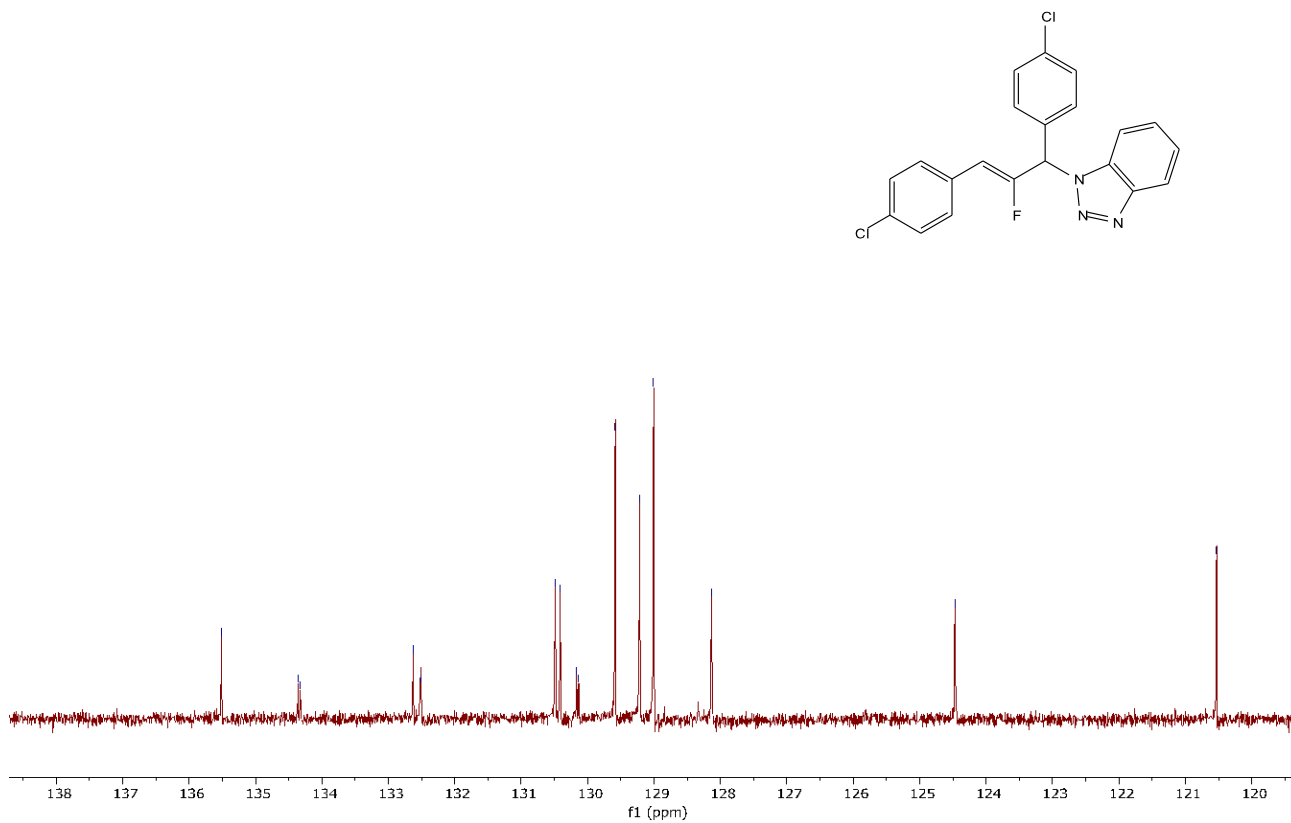

S#587838

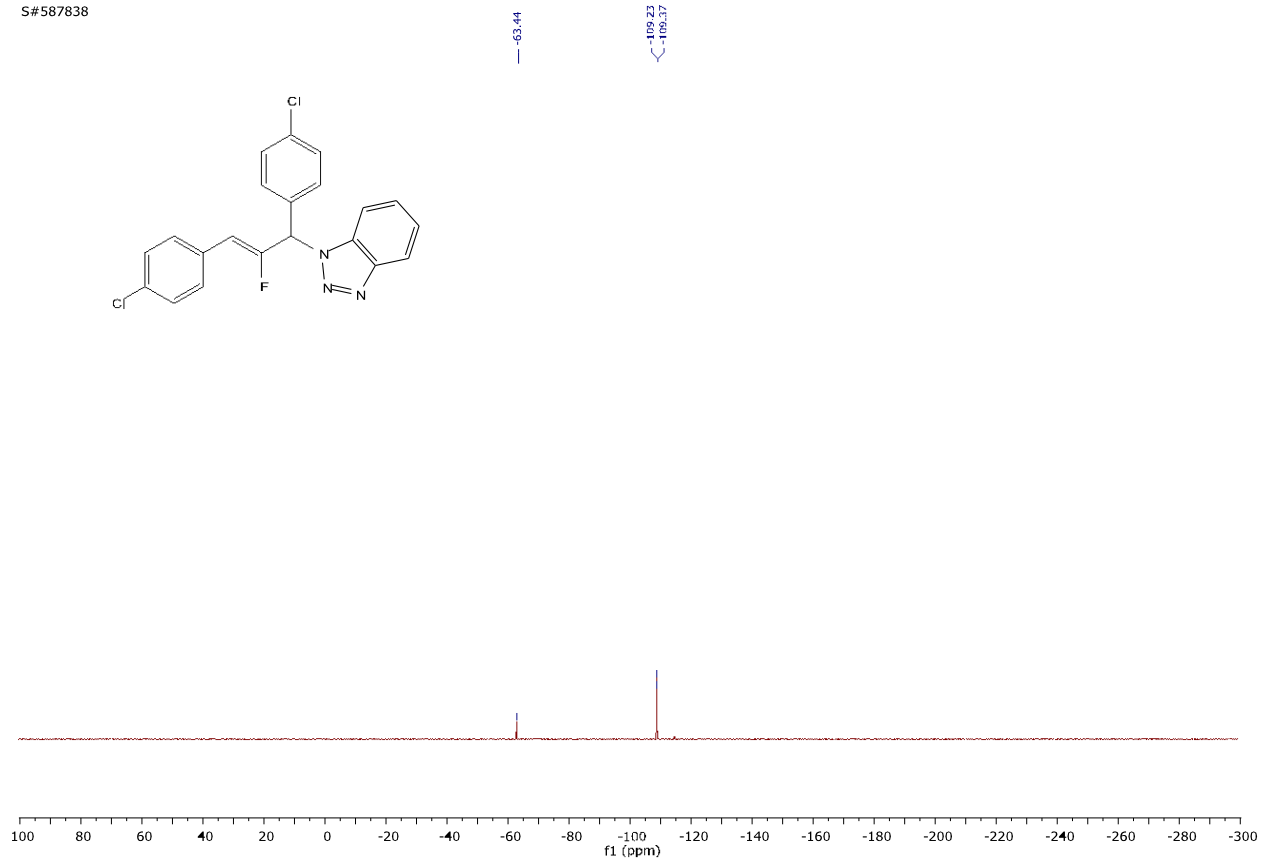

Supplementary Information

S#458261  
single\_pulse

8.02  
8.00  
7.32  
7.31  
7.29  
7.28  
7.26  
7.25  
7.24  
7.17  
7.15  
7.13  
7.11  
7.09  
7.05  
6.85  
6.82  
5.78  
5.71

3.27  
3.25

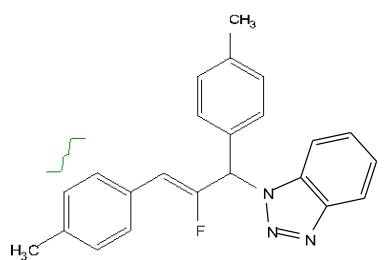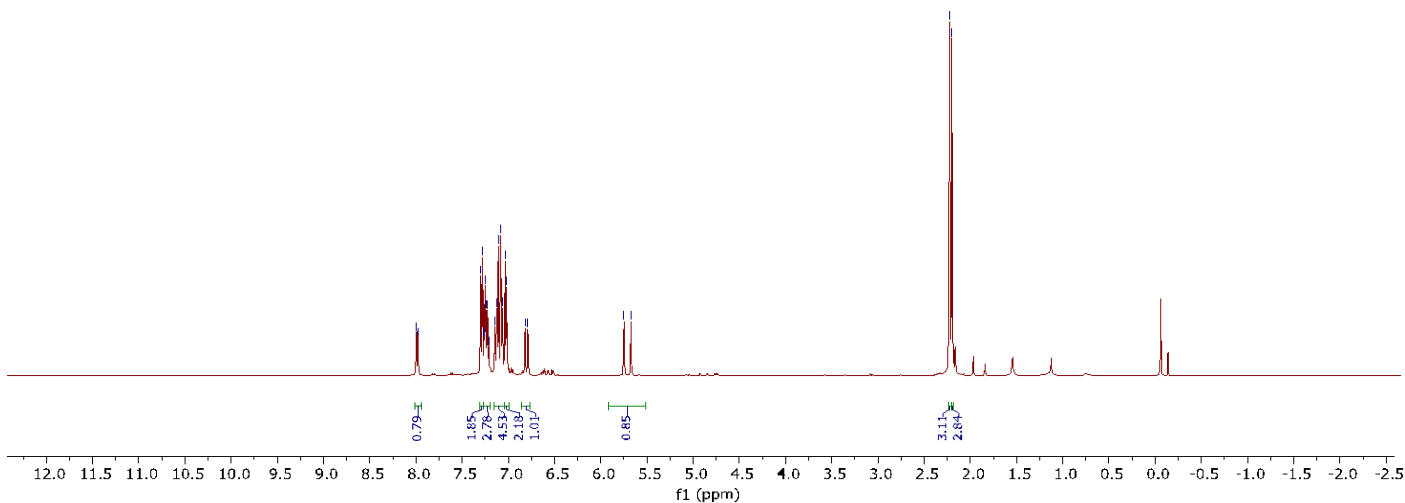

S#848515  
single pulse decoupled gated NOE

153.31  
153.17  
146.59  
139.14  
138.32  
132.81  
131.35  
129.87  
129.41  
129.12  
129.06  
127.71  
124.13  
120.26  
112.13  
112.08  
111.03

77.41  
76.91

65.35  
65.12

21.51  
21.29

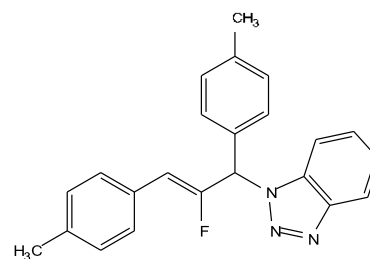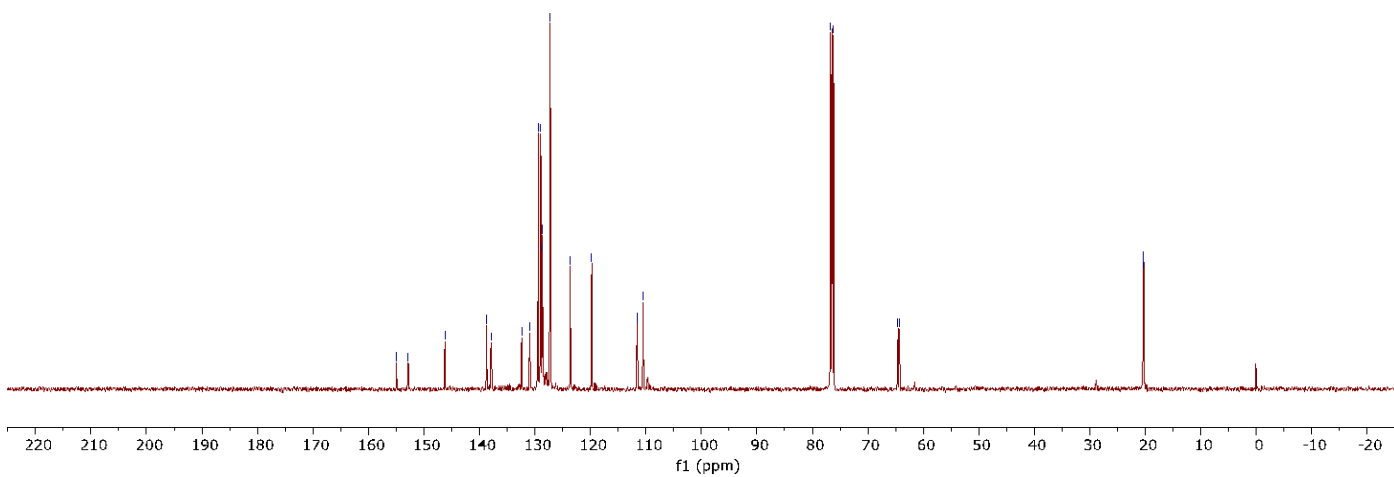

S#457253

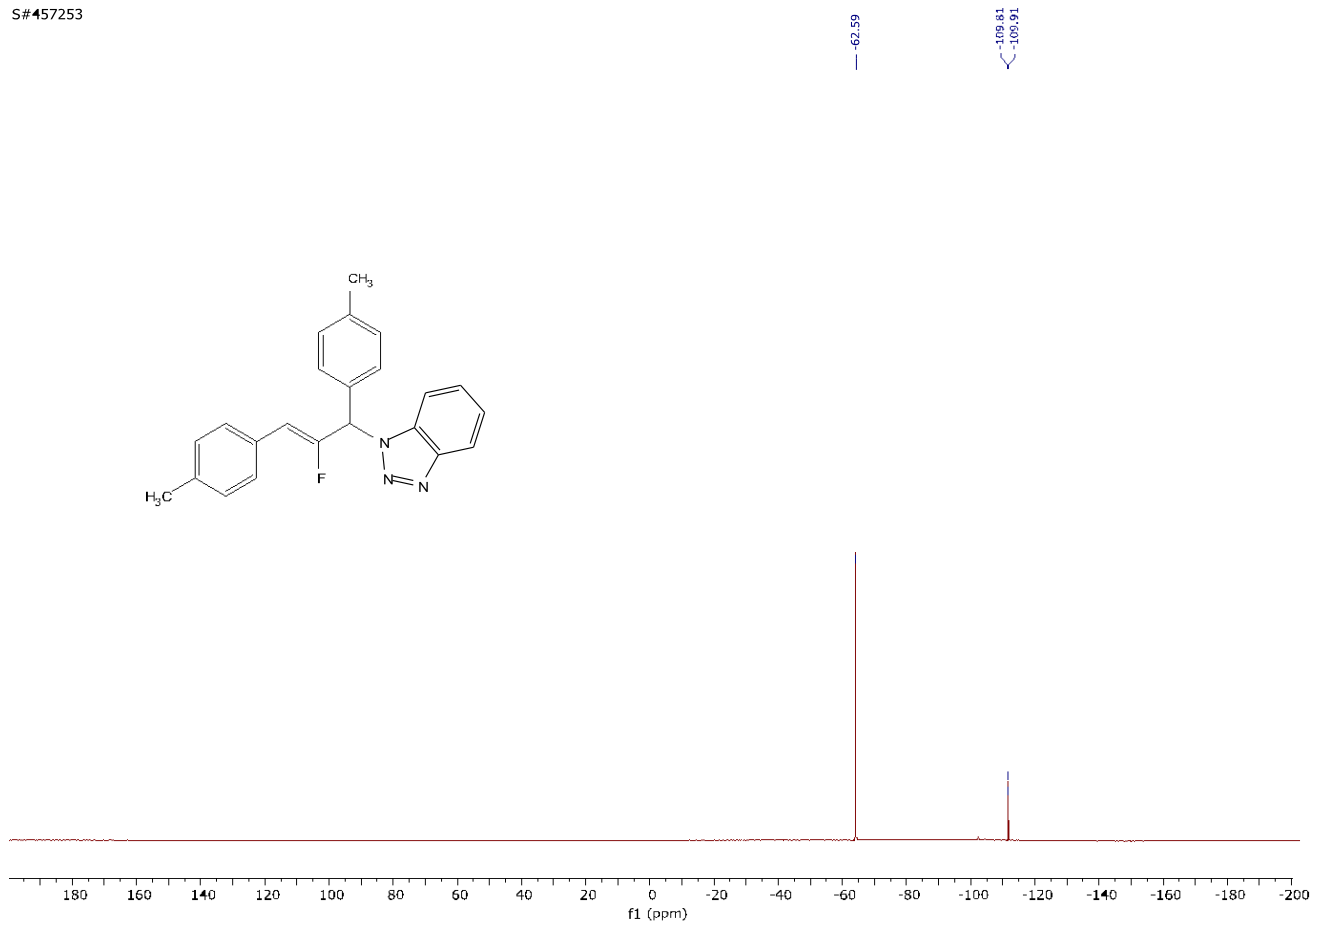

Supplementary Information

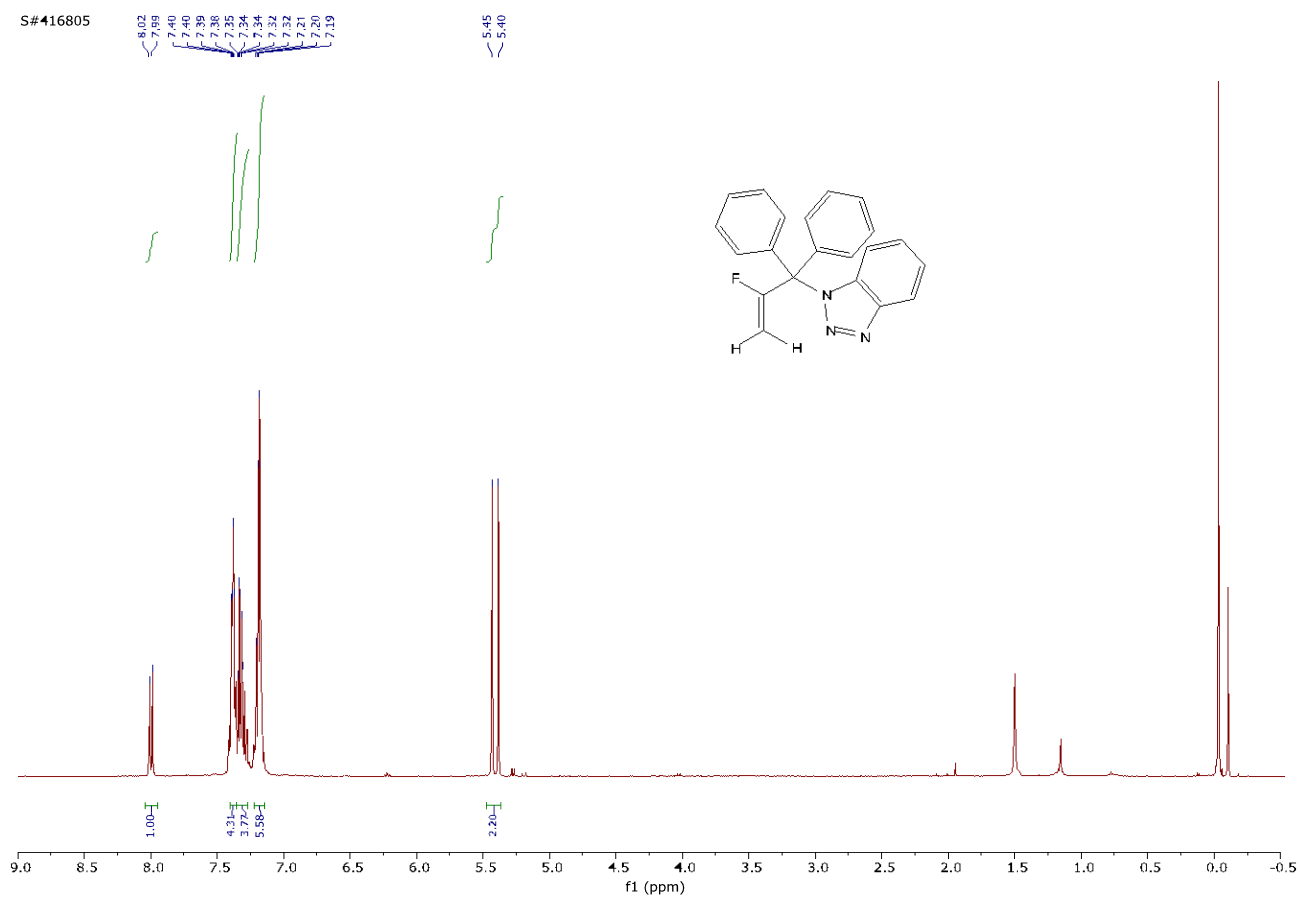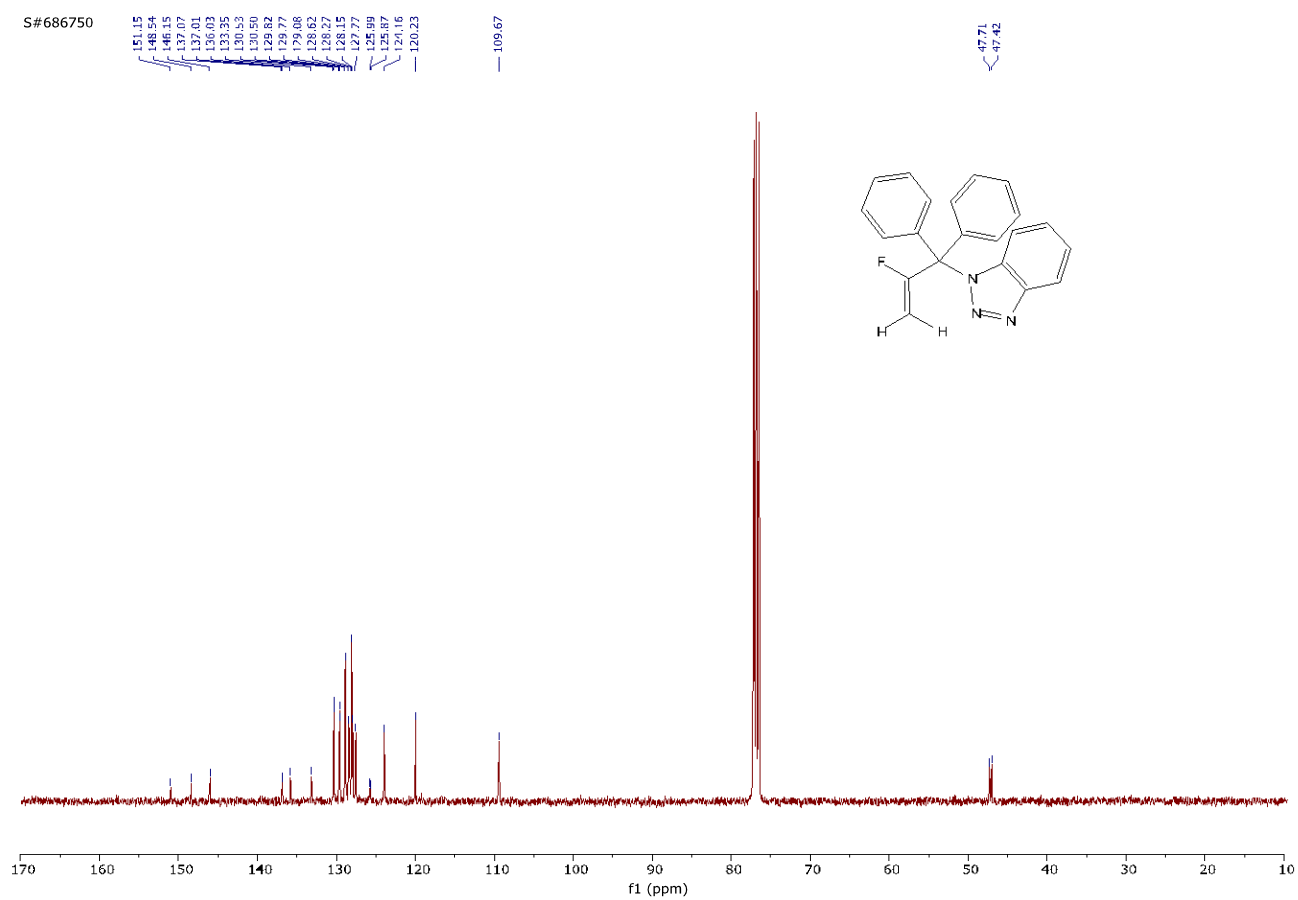

S#447146

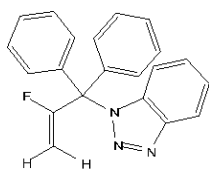

— 63.45

← -112.66  
← -112.71  
← -112.77

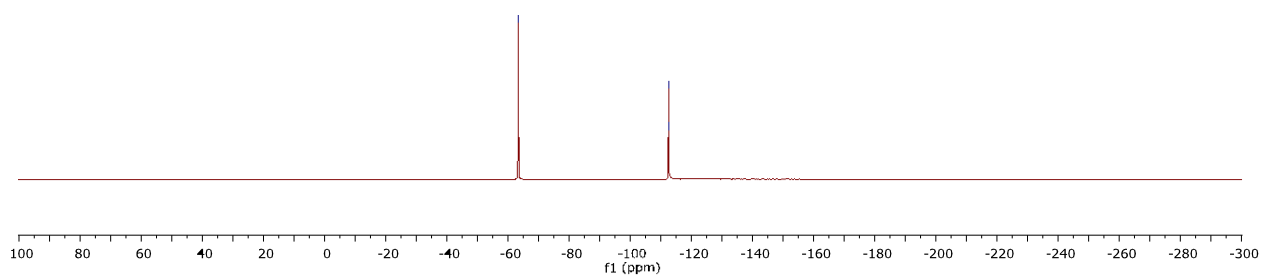



Supplementary Information

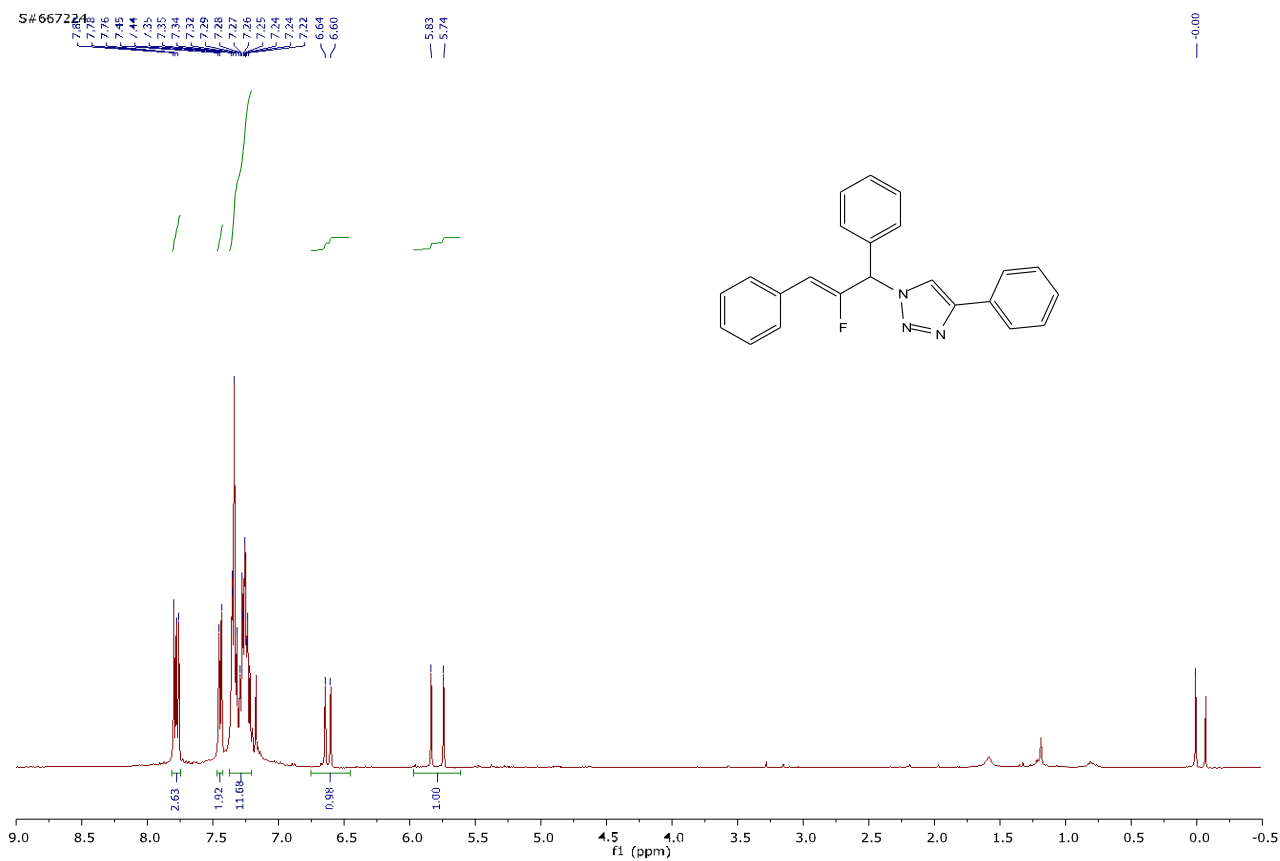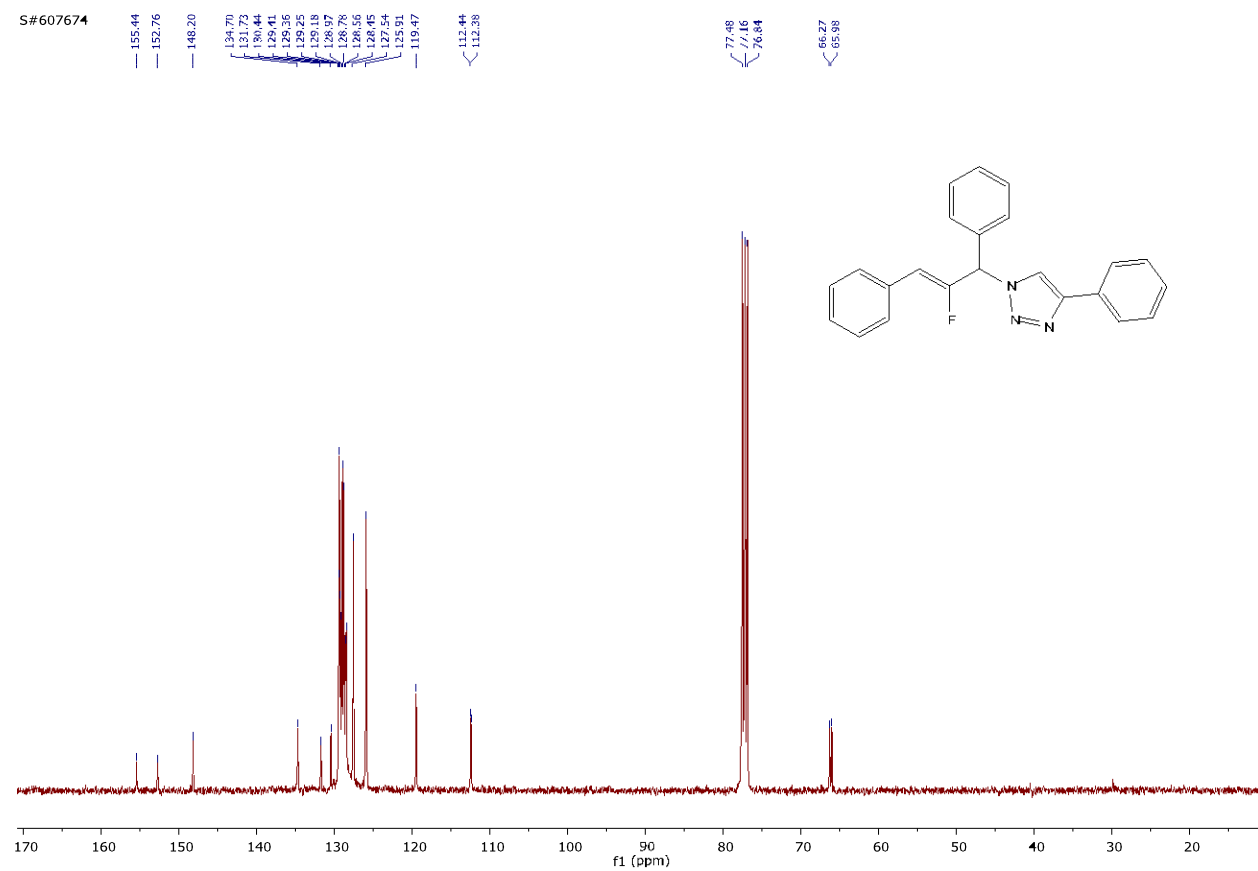

S#434767

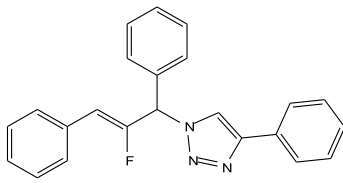

— 63.38

← -112.39  
← -112.49

A (d)  
-112.44

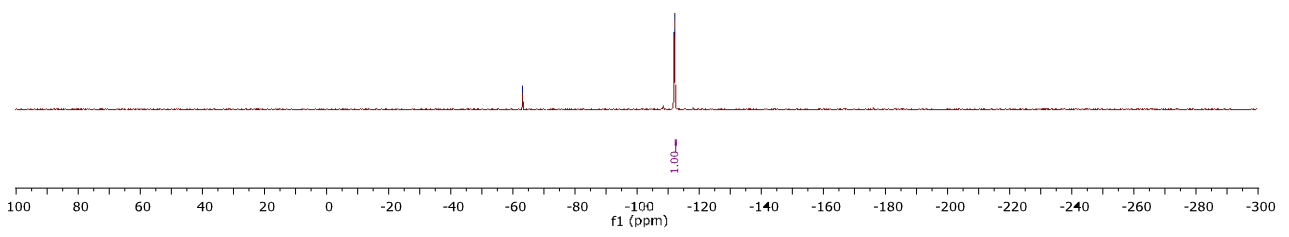

S#541328

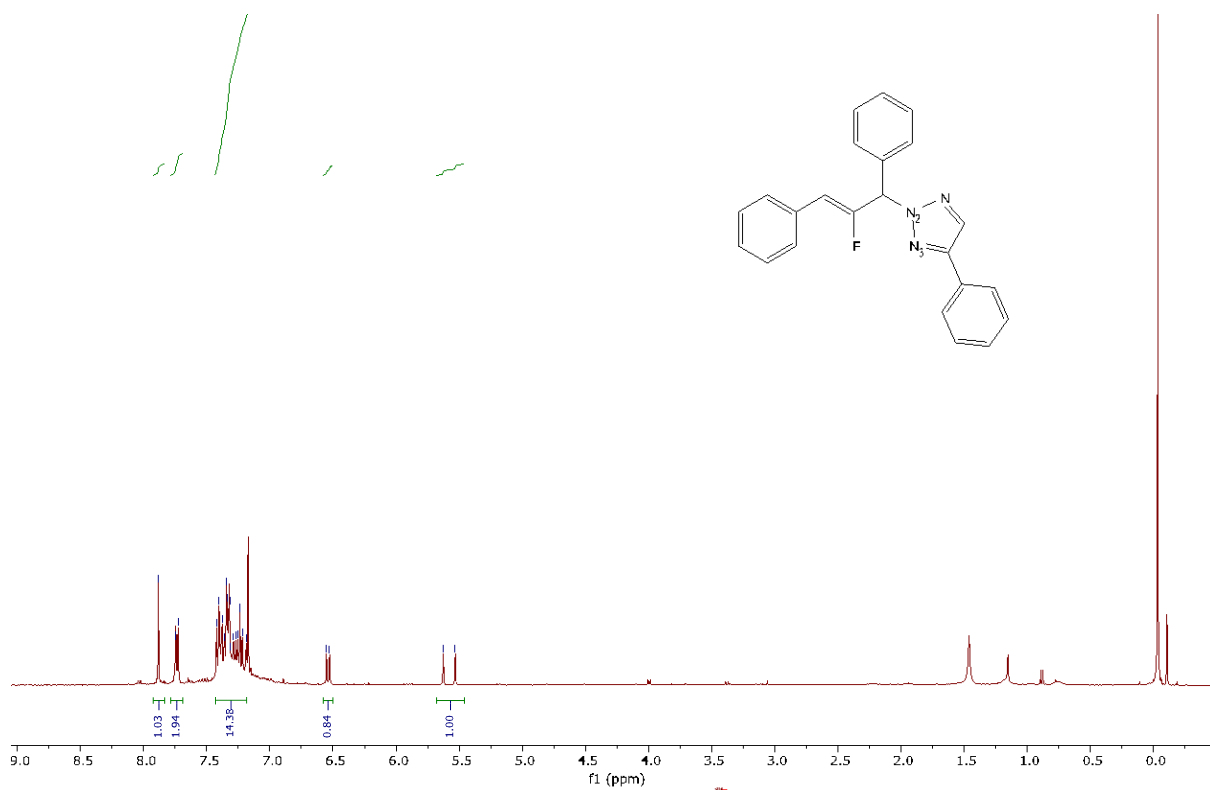

S#607587

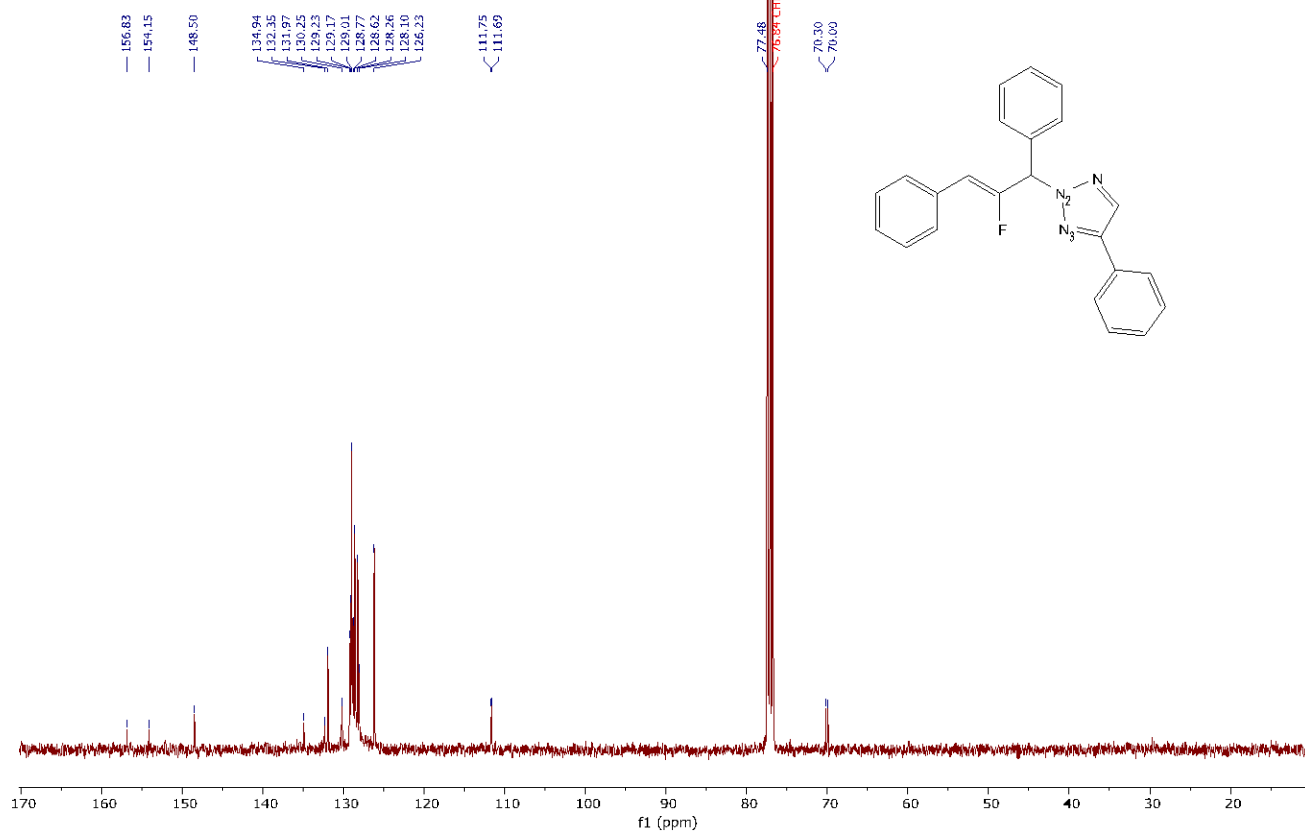

S#431555

— 63.37

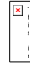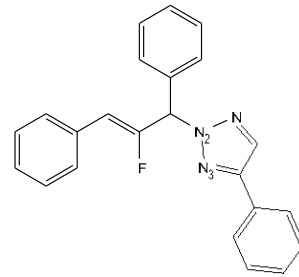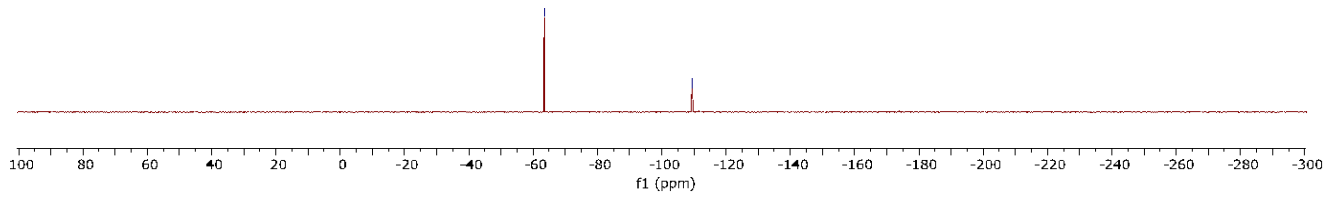

Supplementary Information

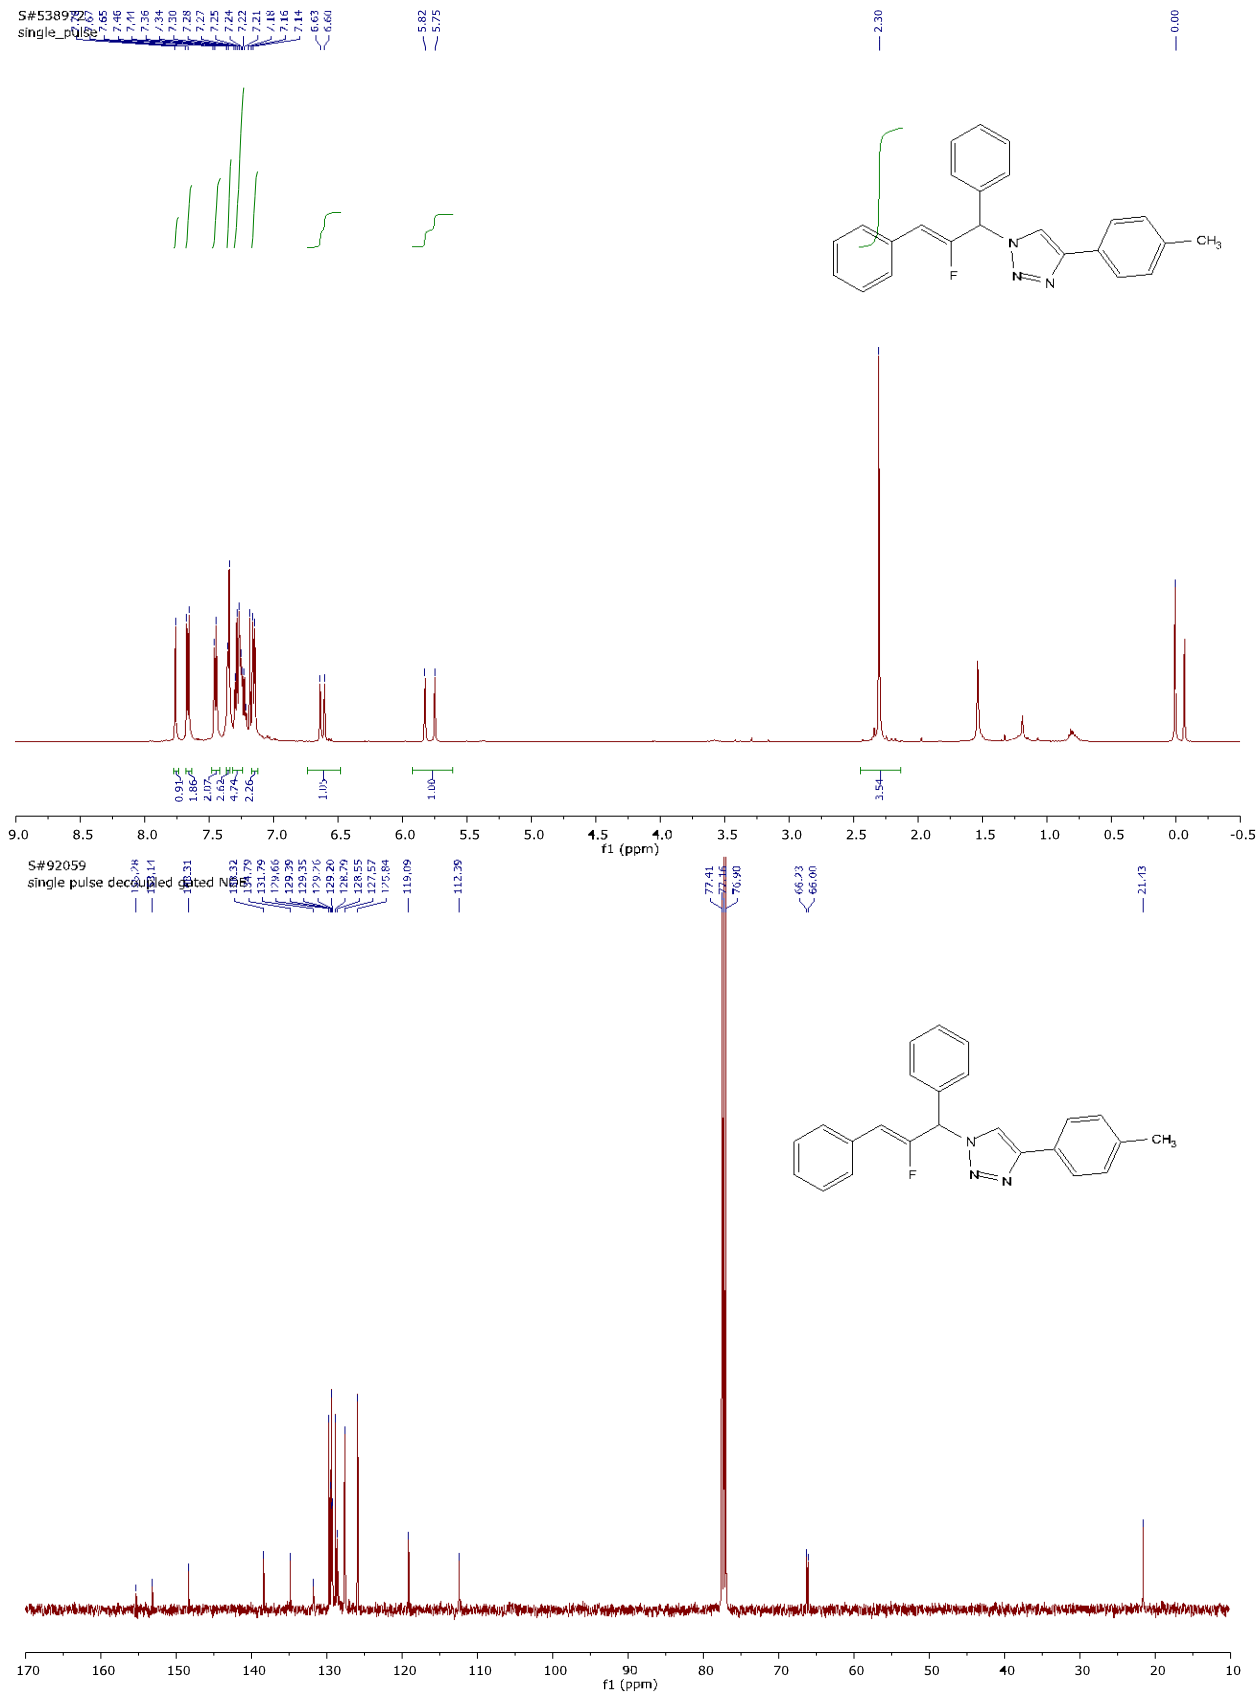

S#431178

— 63.39

112.38  
112.33  
112.39

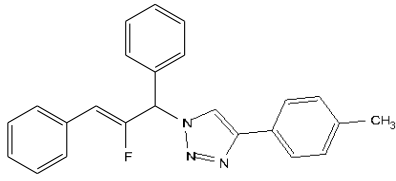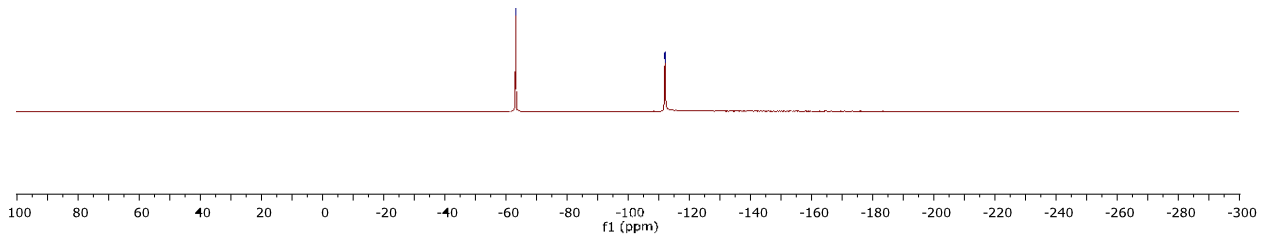

Supplementary Information

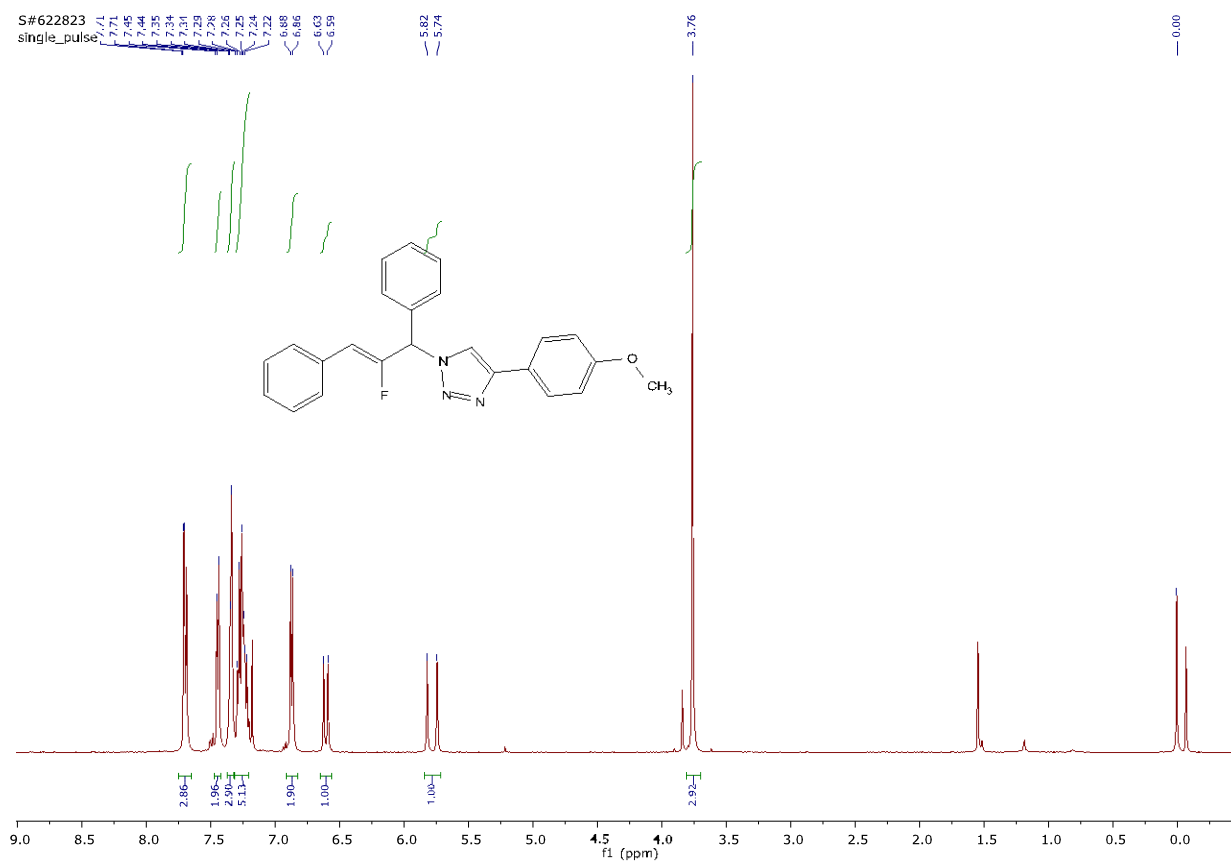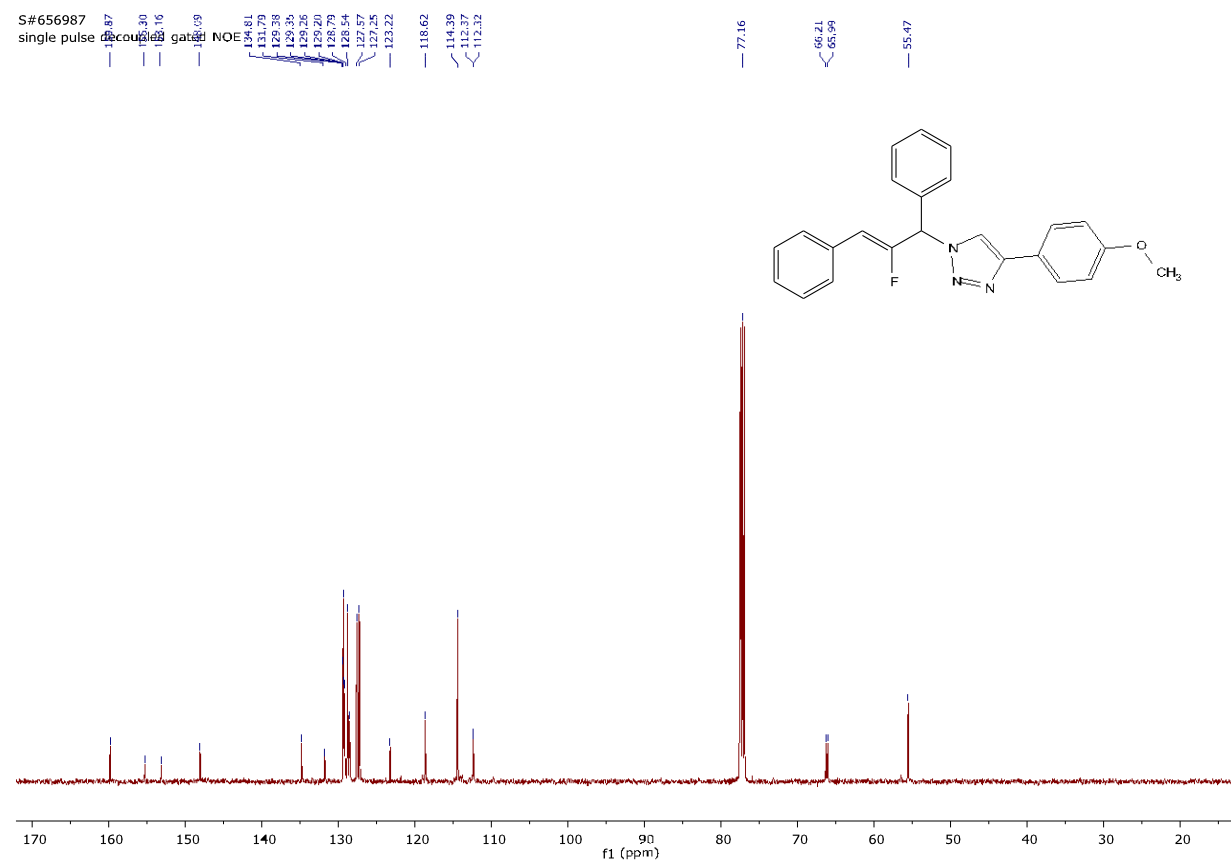

Supplementary Information

S#550921

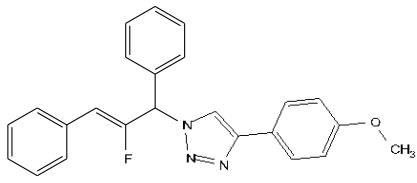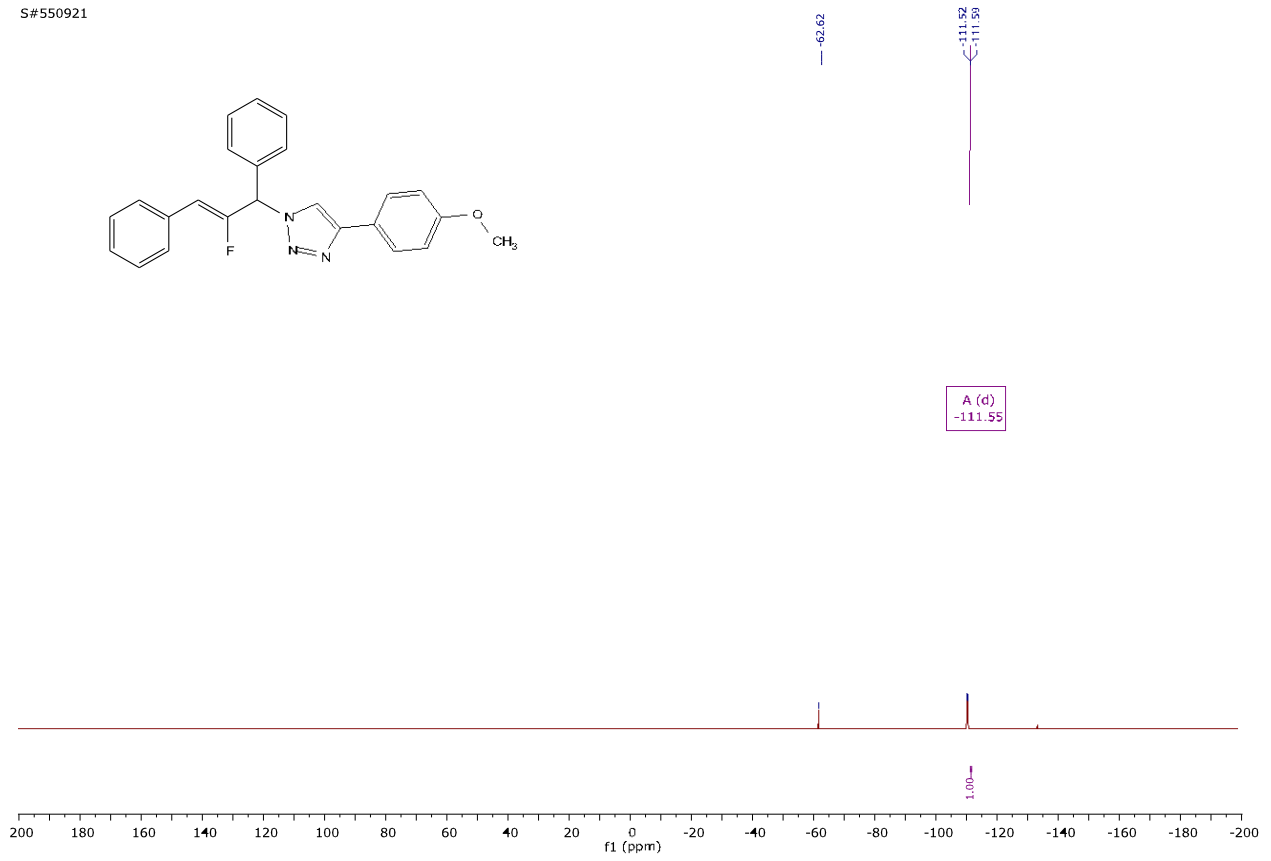



Supplementary Information

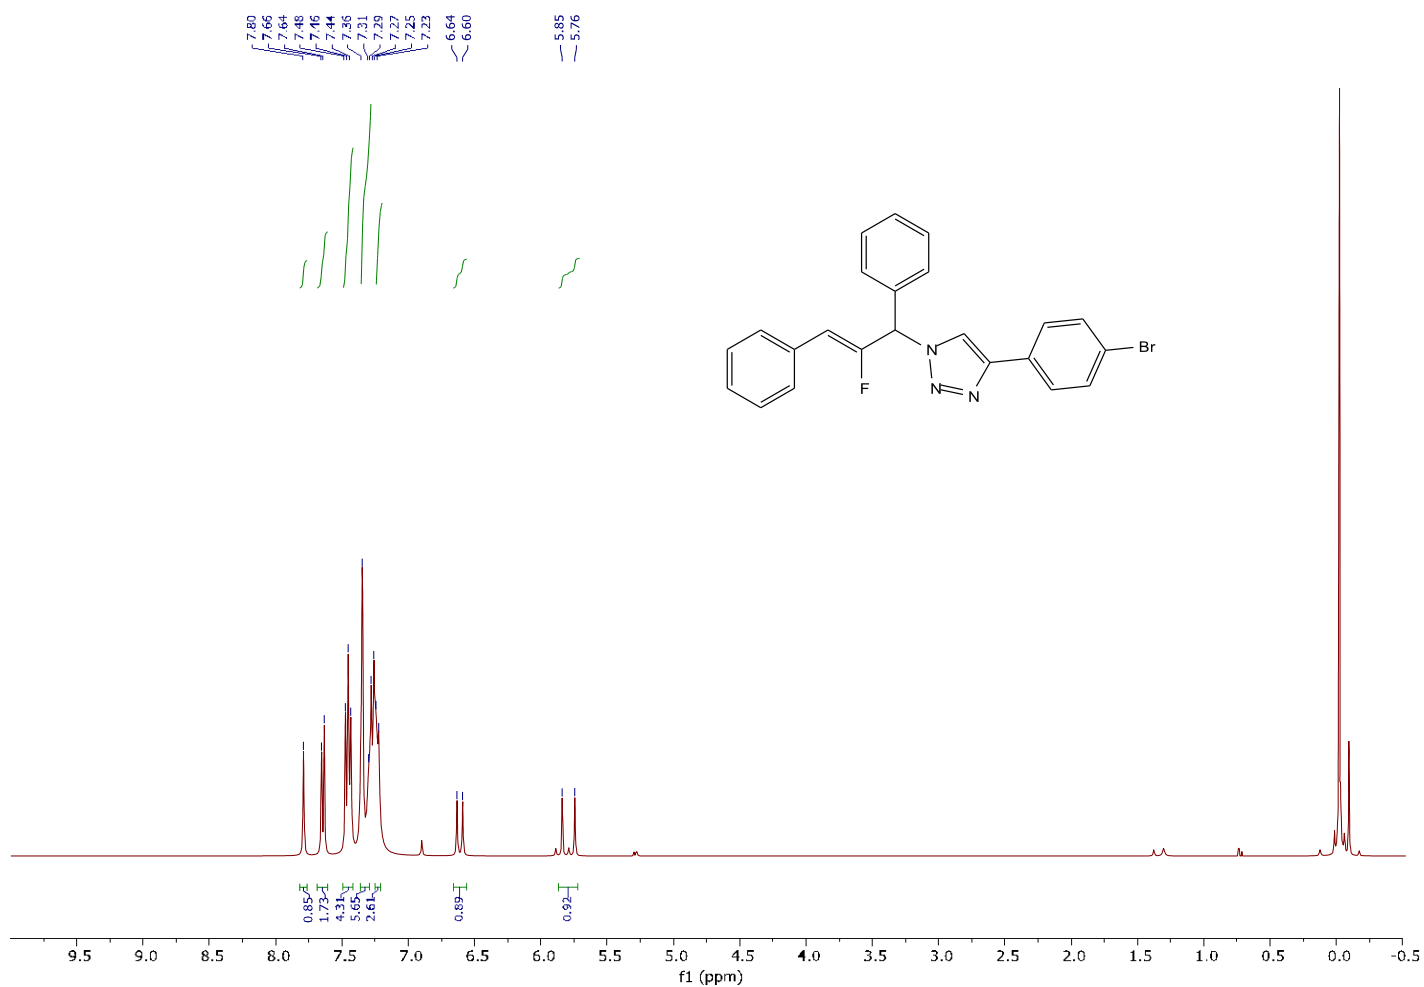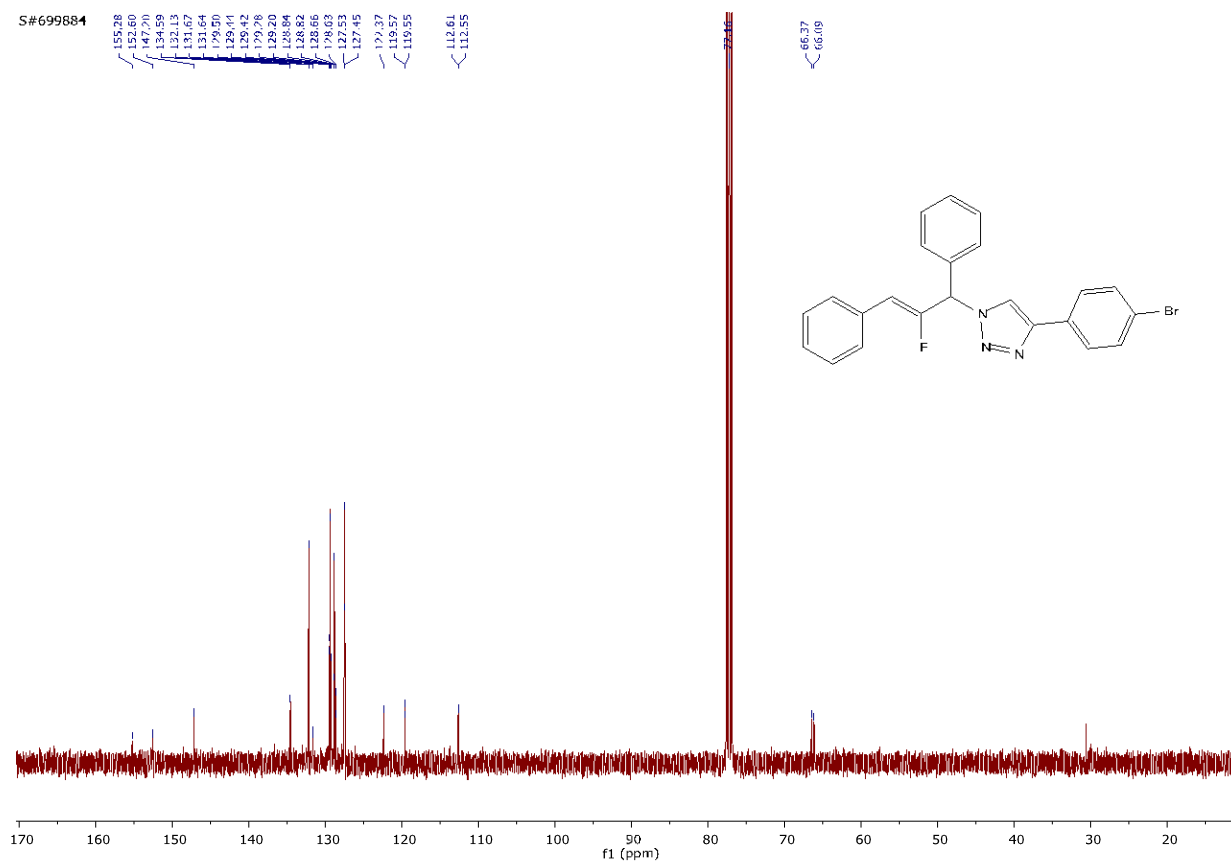

S#589006

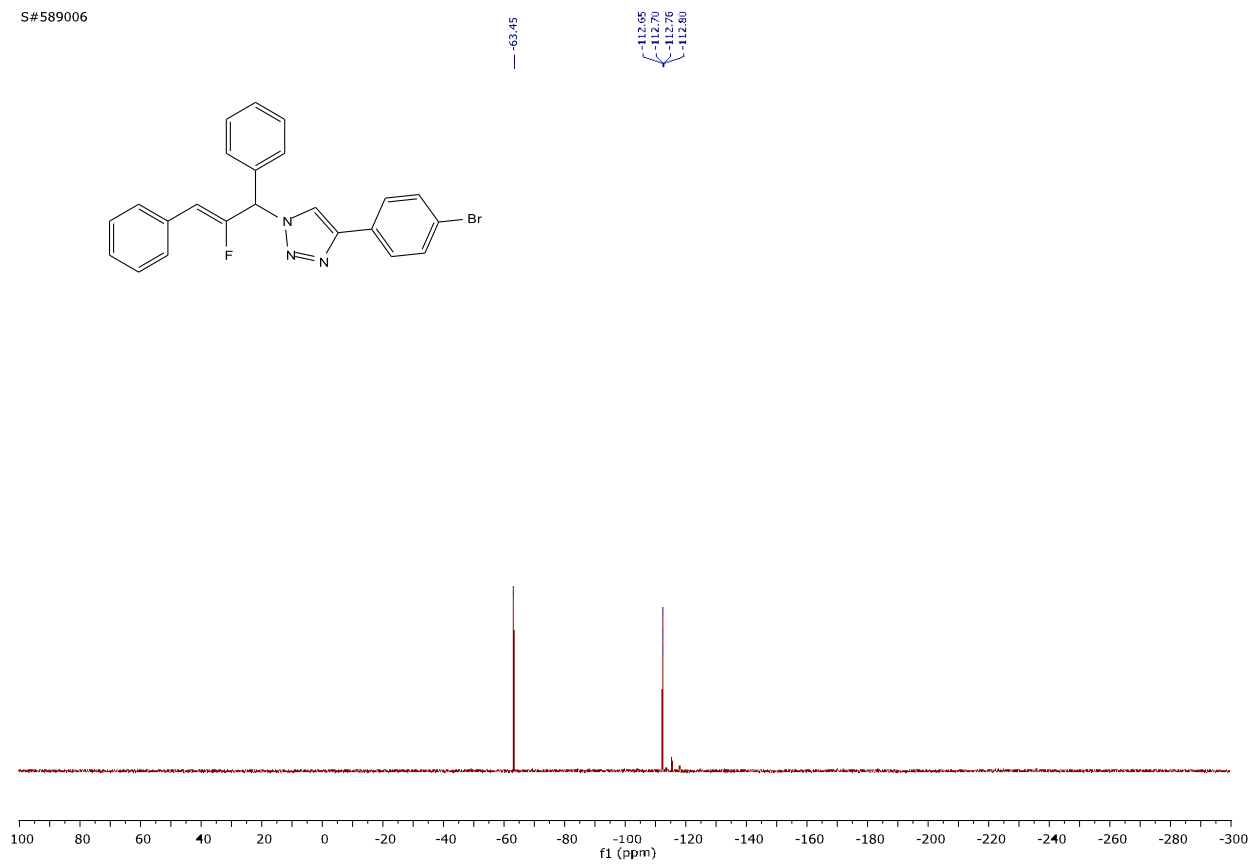

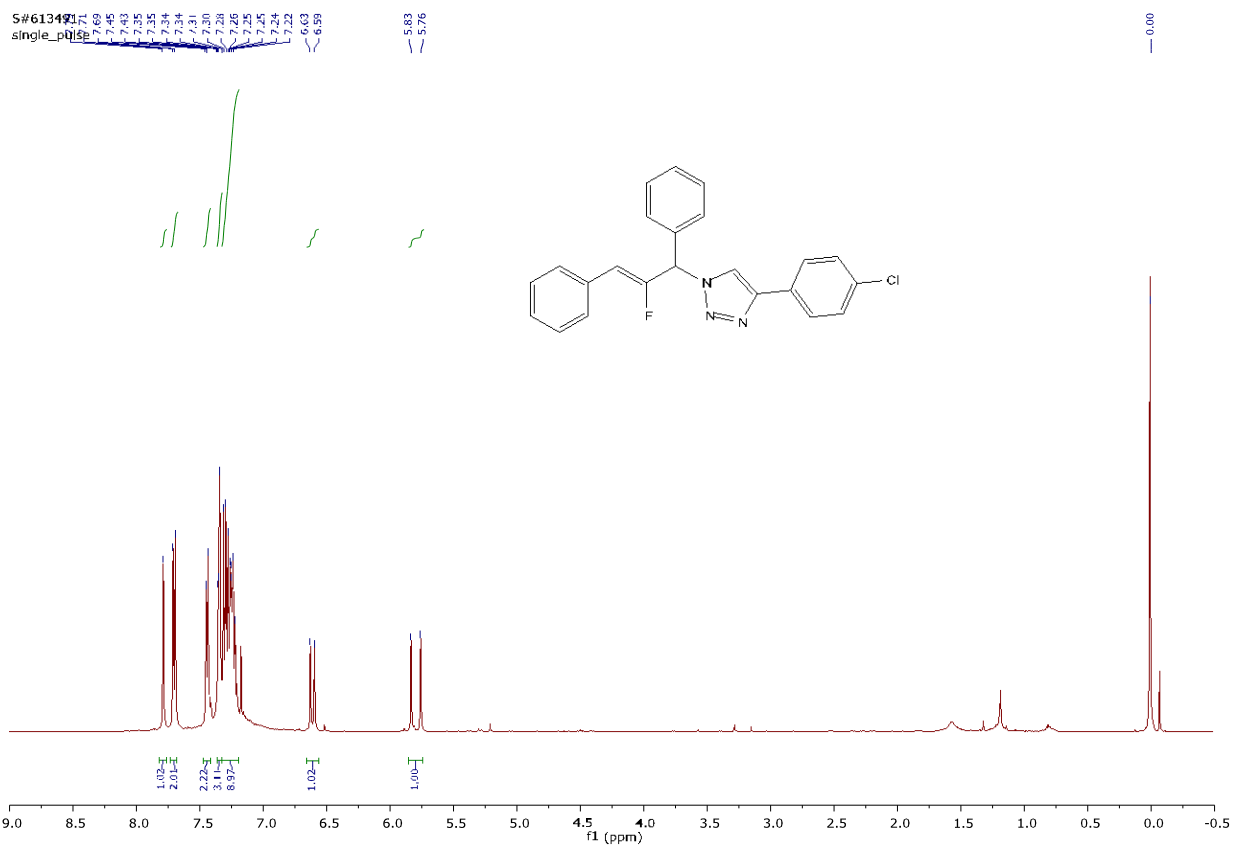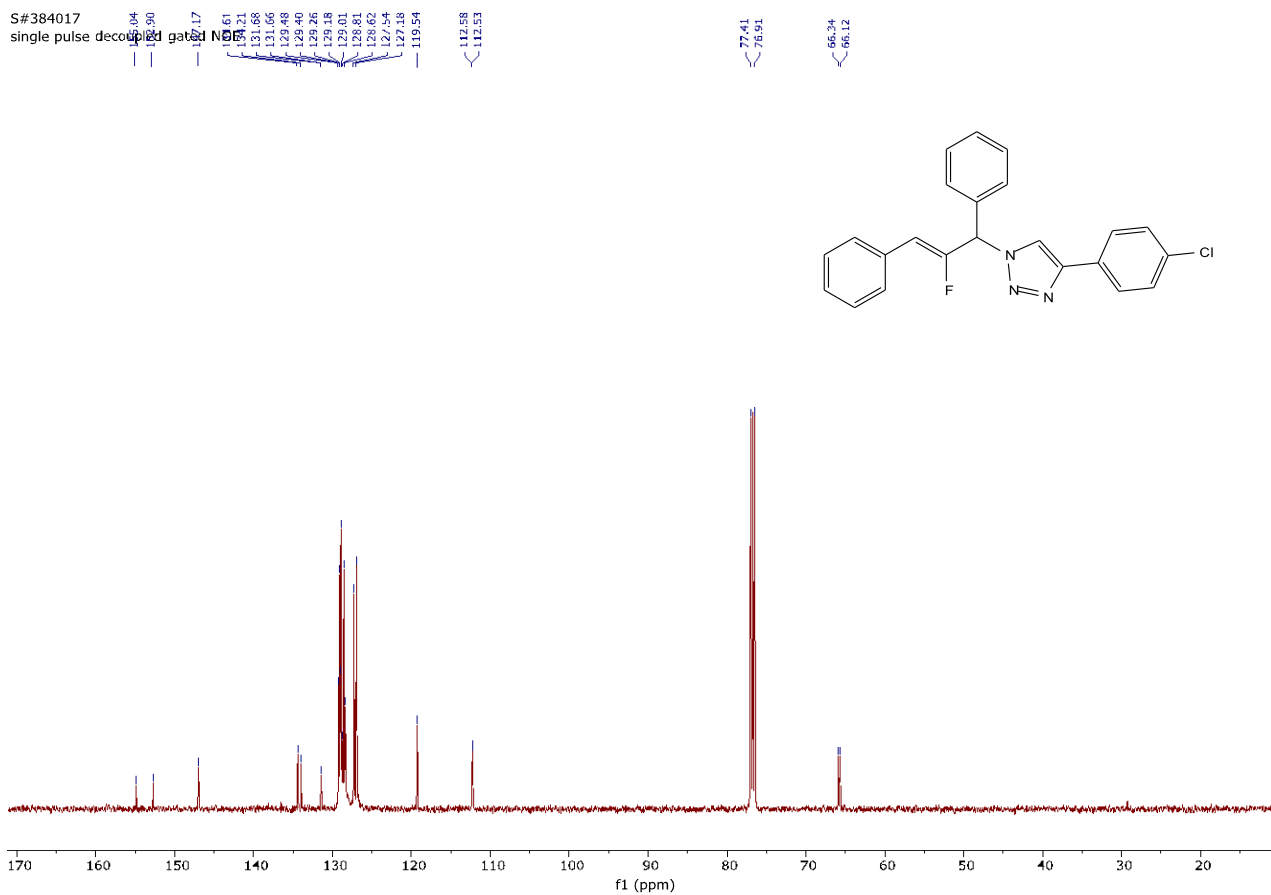

S#606274

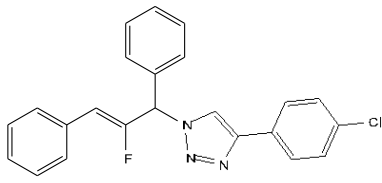

-62.59

-111.80  
-111.86  
-111.95

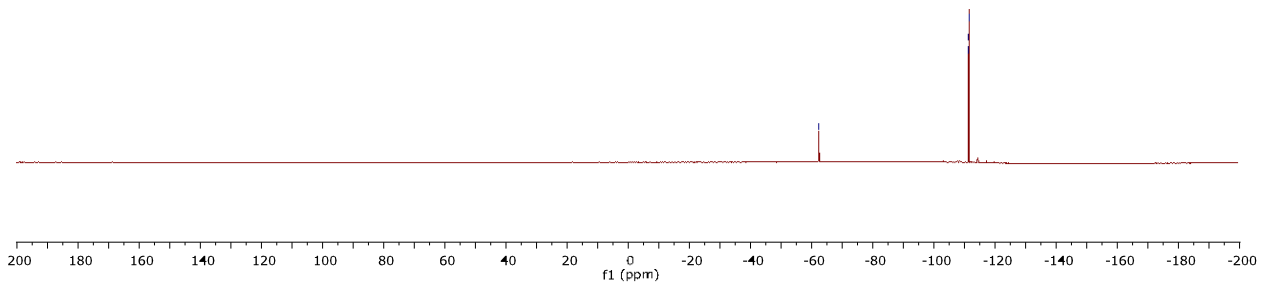

Supplementary Information

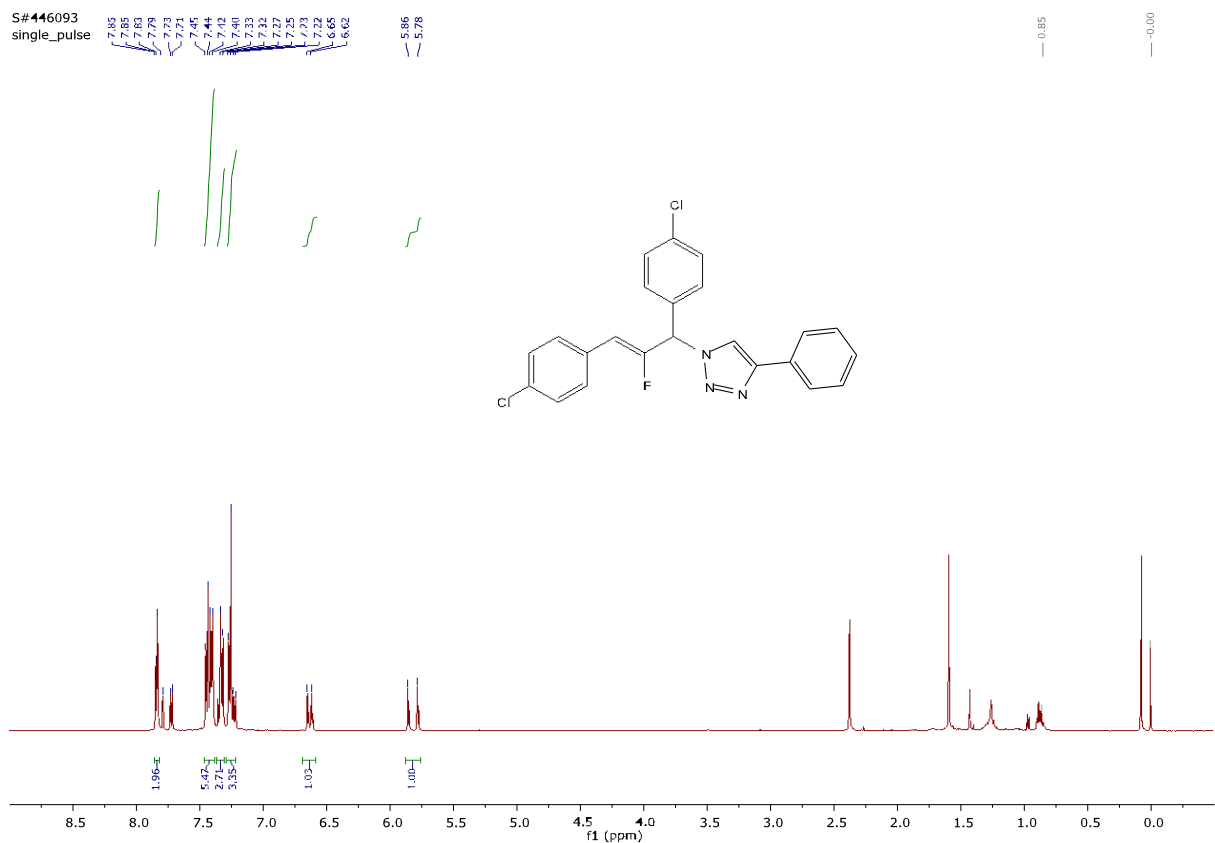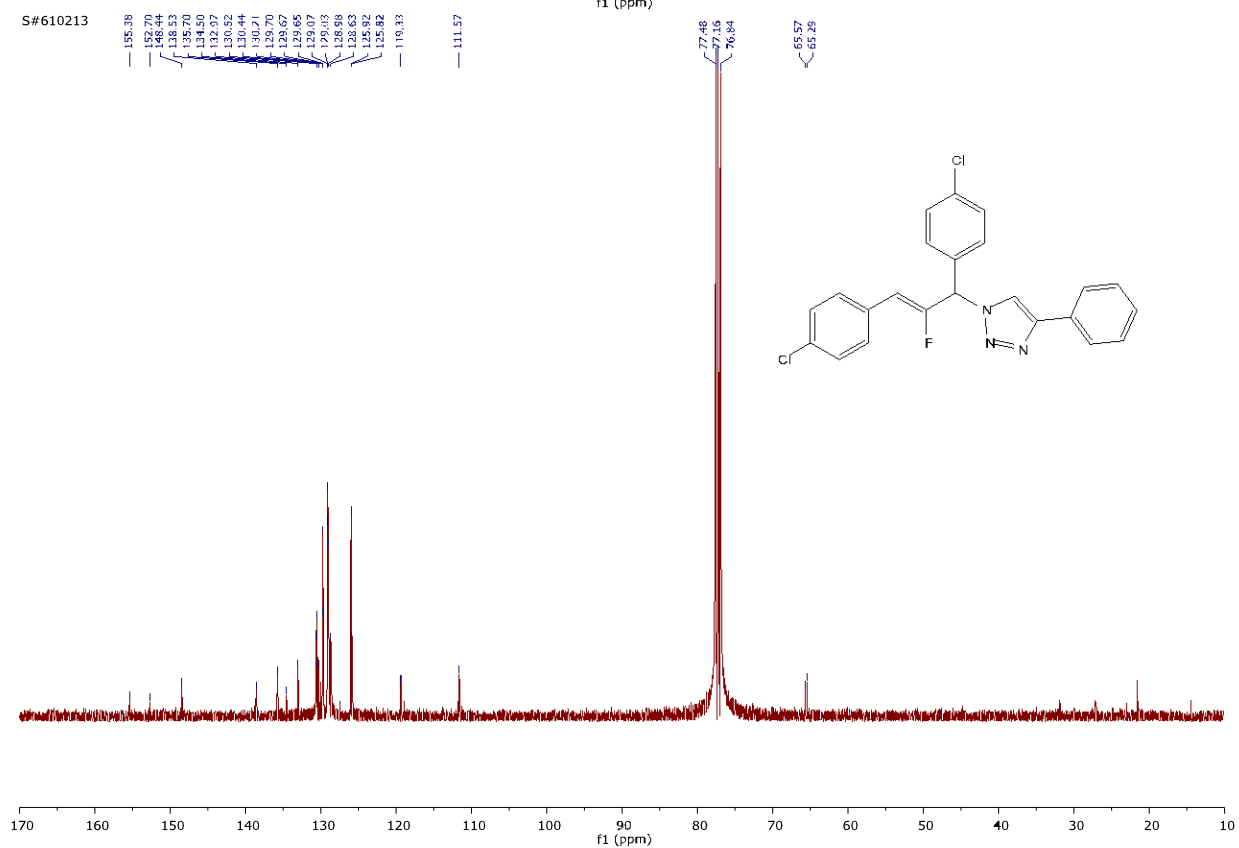

S#550386

-62.62

-111.17  
-111.22  
-111.31  
-111.37

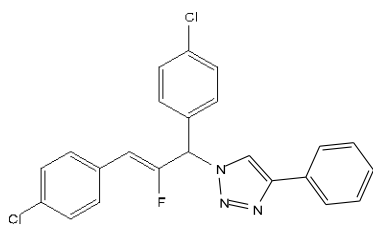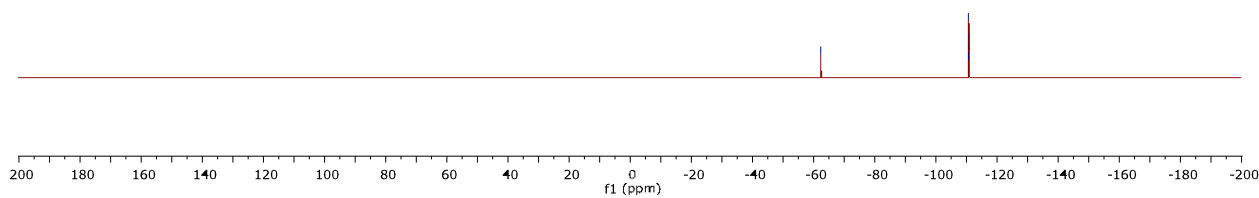

Supplementary Information

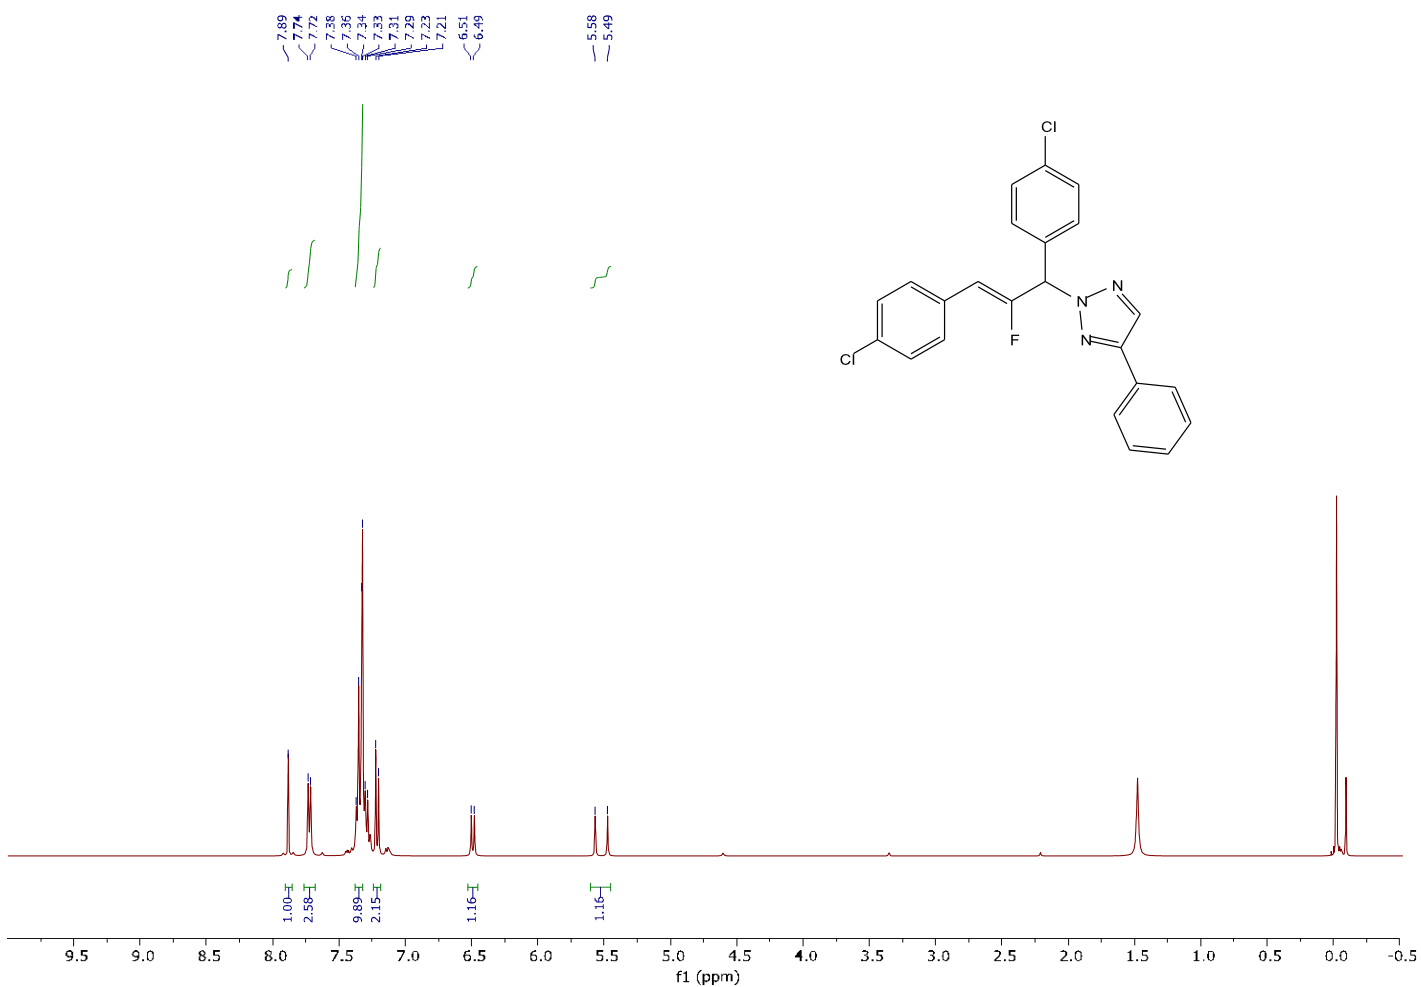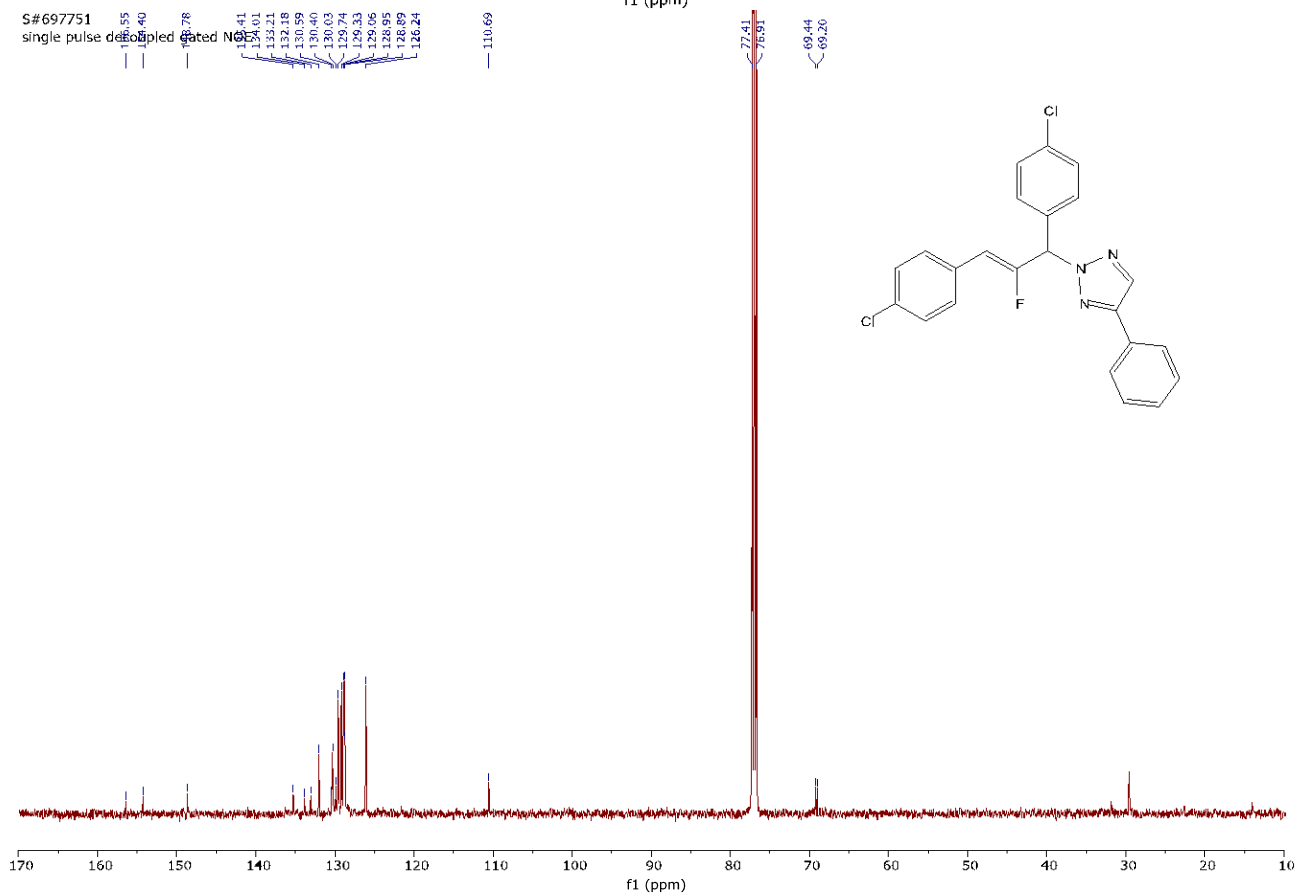

Supplementary Information

S#548139

62.64  
108.09  
108.19

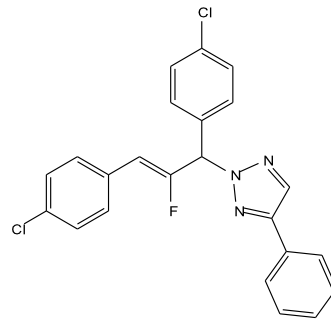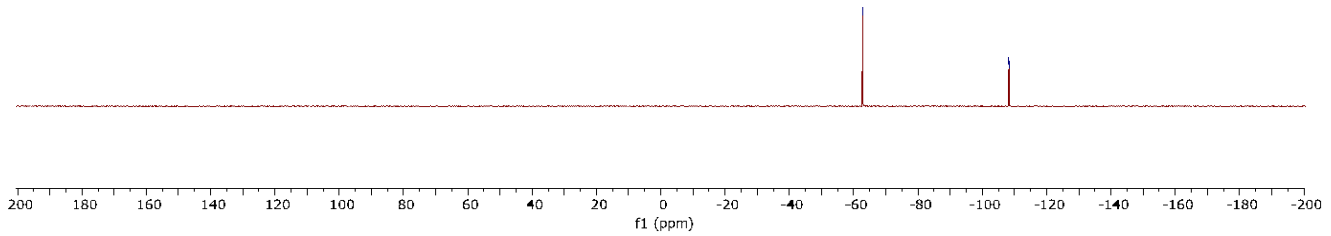



Supplementary Information

S#444383

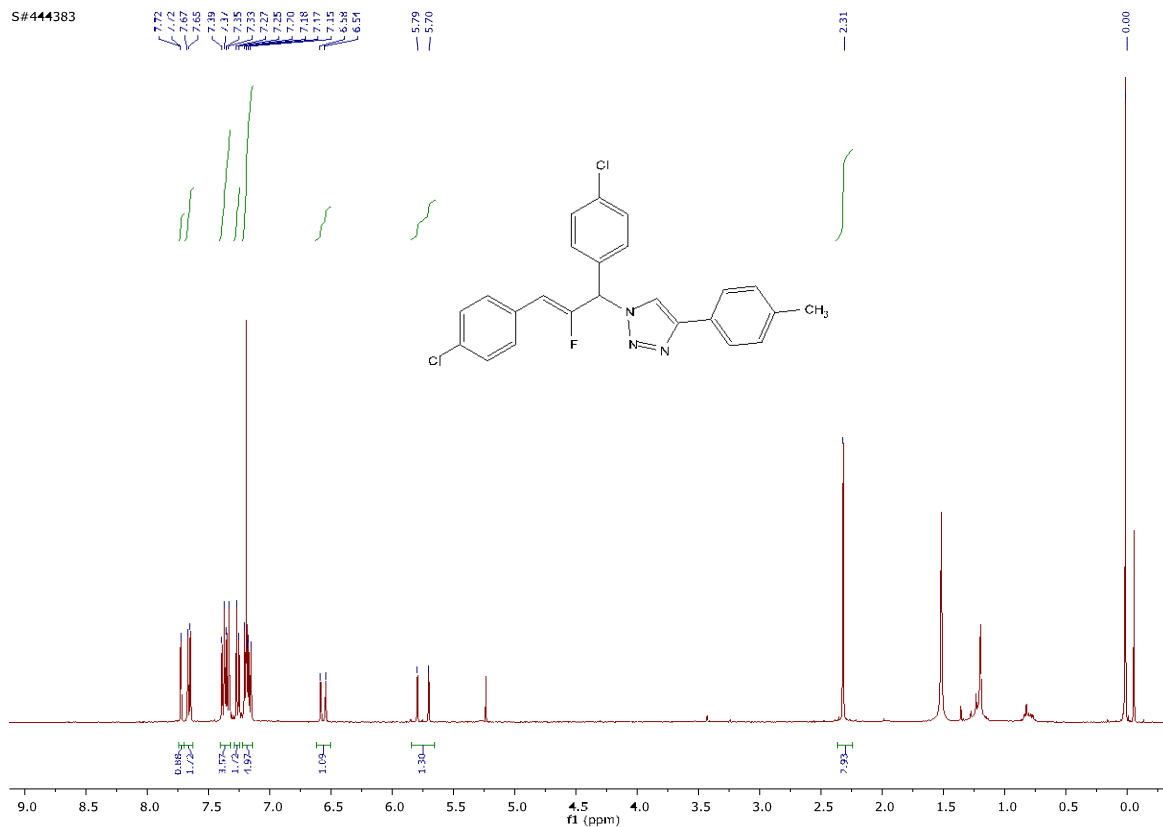

S#649045

single pulse decoupled gated

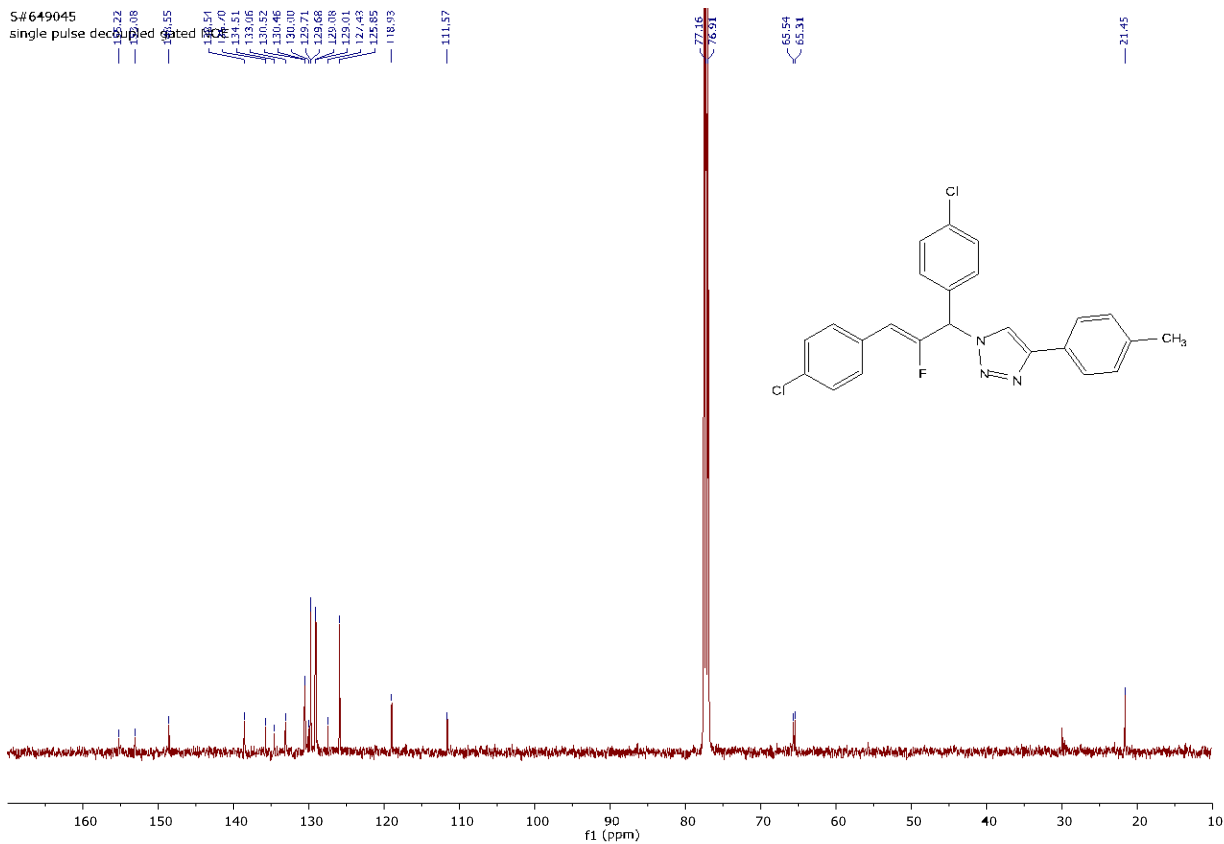

S#559969

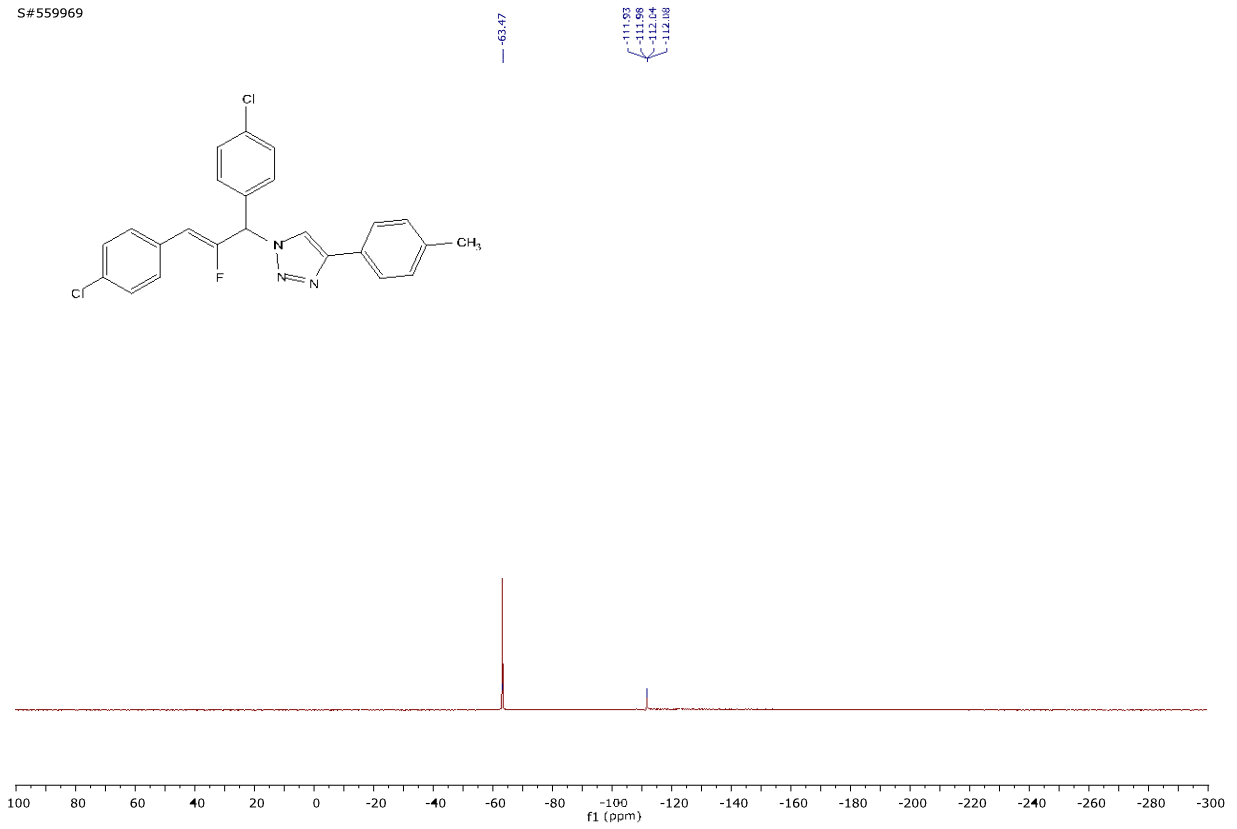

Supplementary Information

S#535805  
single\_pulse

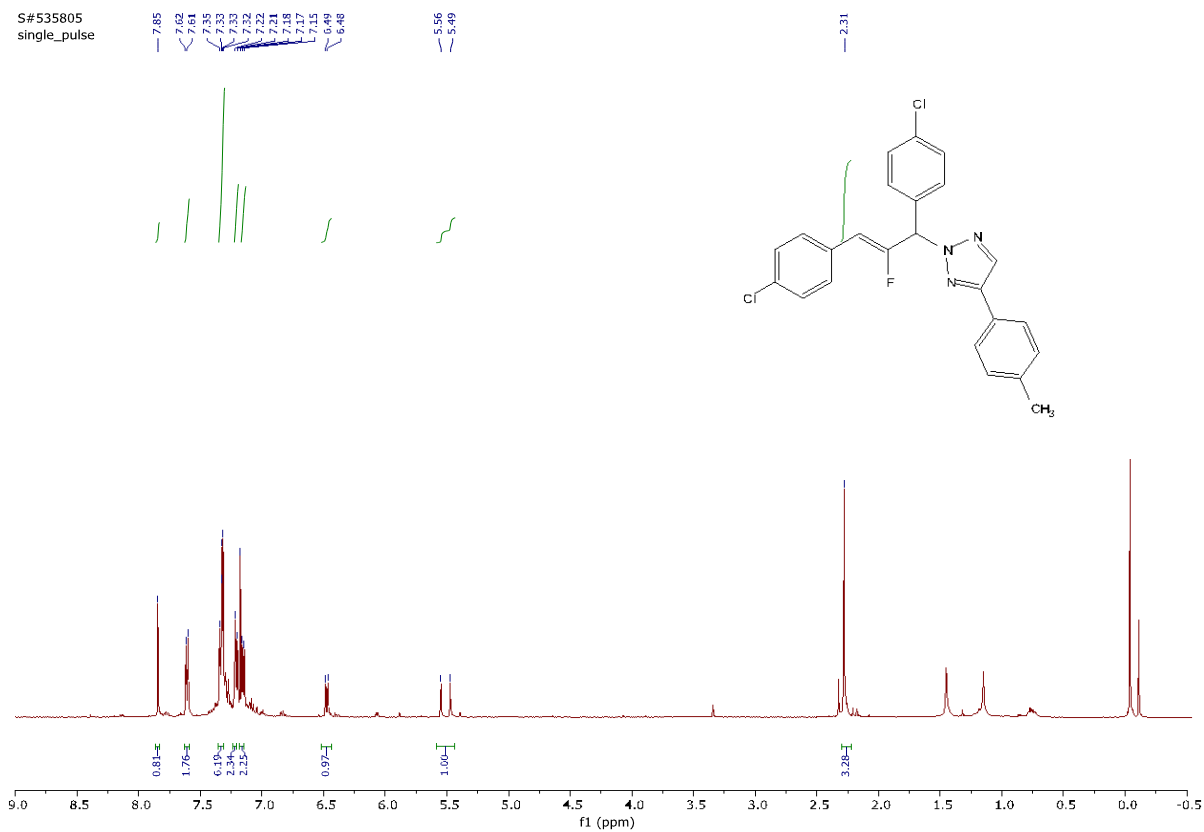

S#550152

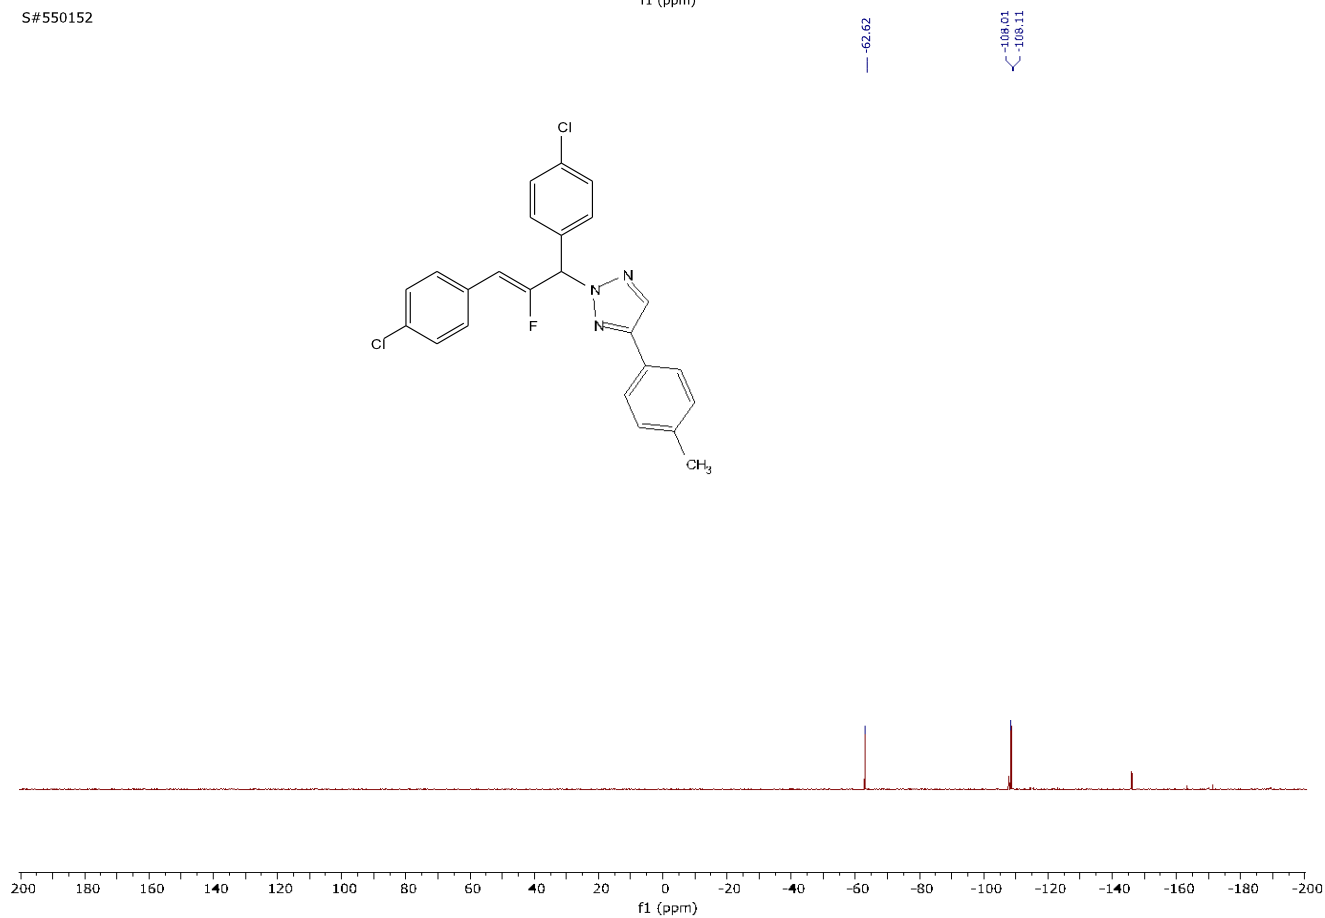

Supplementary Information

S#480912

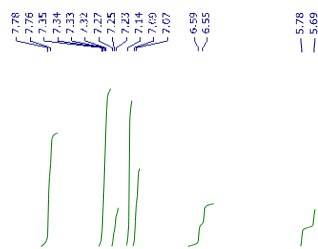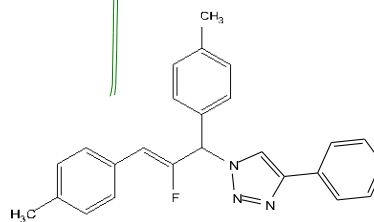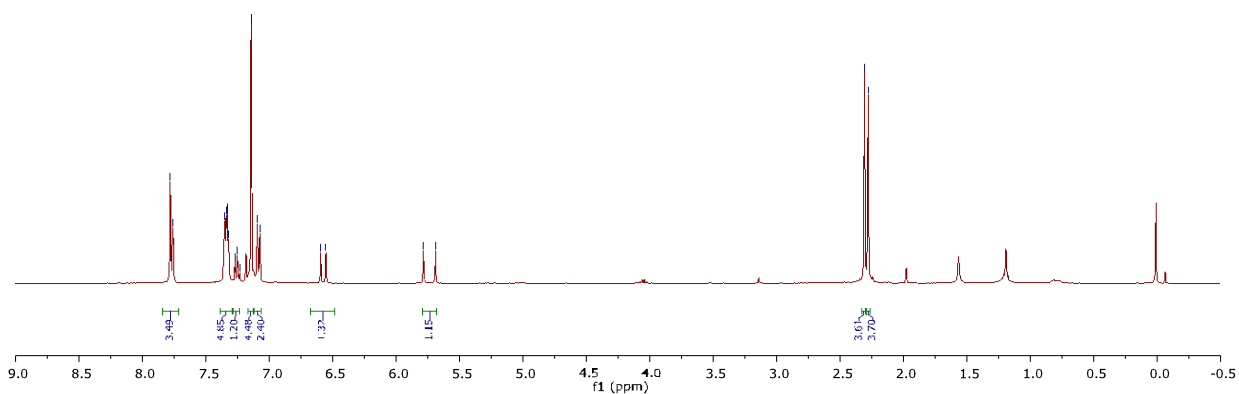

S#291539

single pulse decoupled

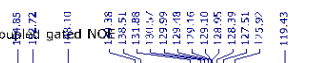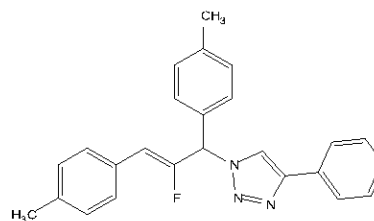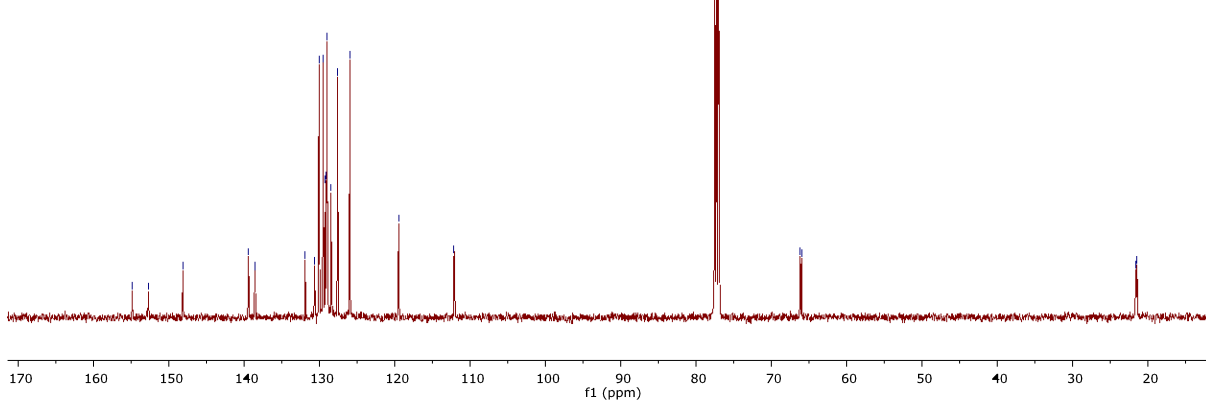

S#582535

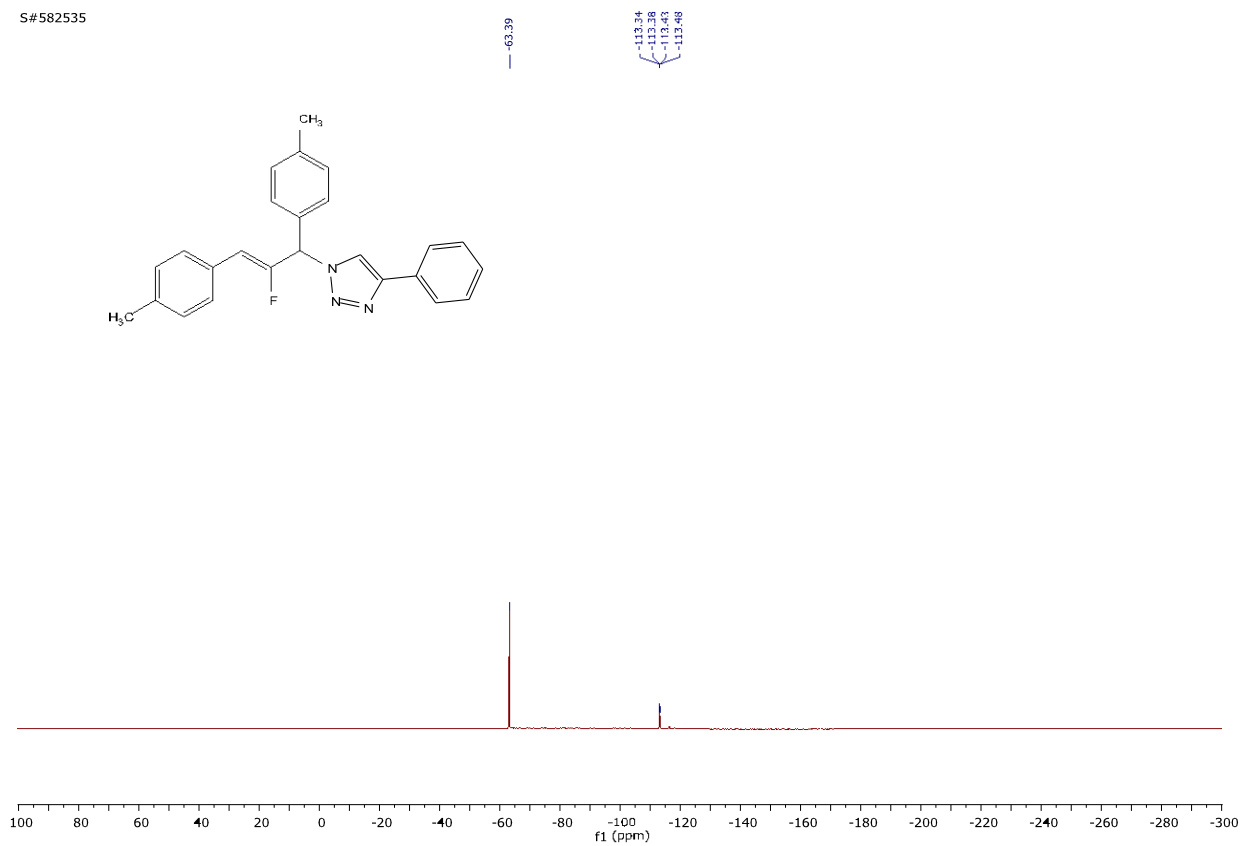

S#527600

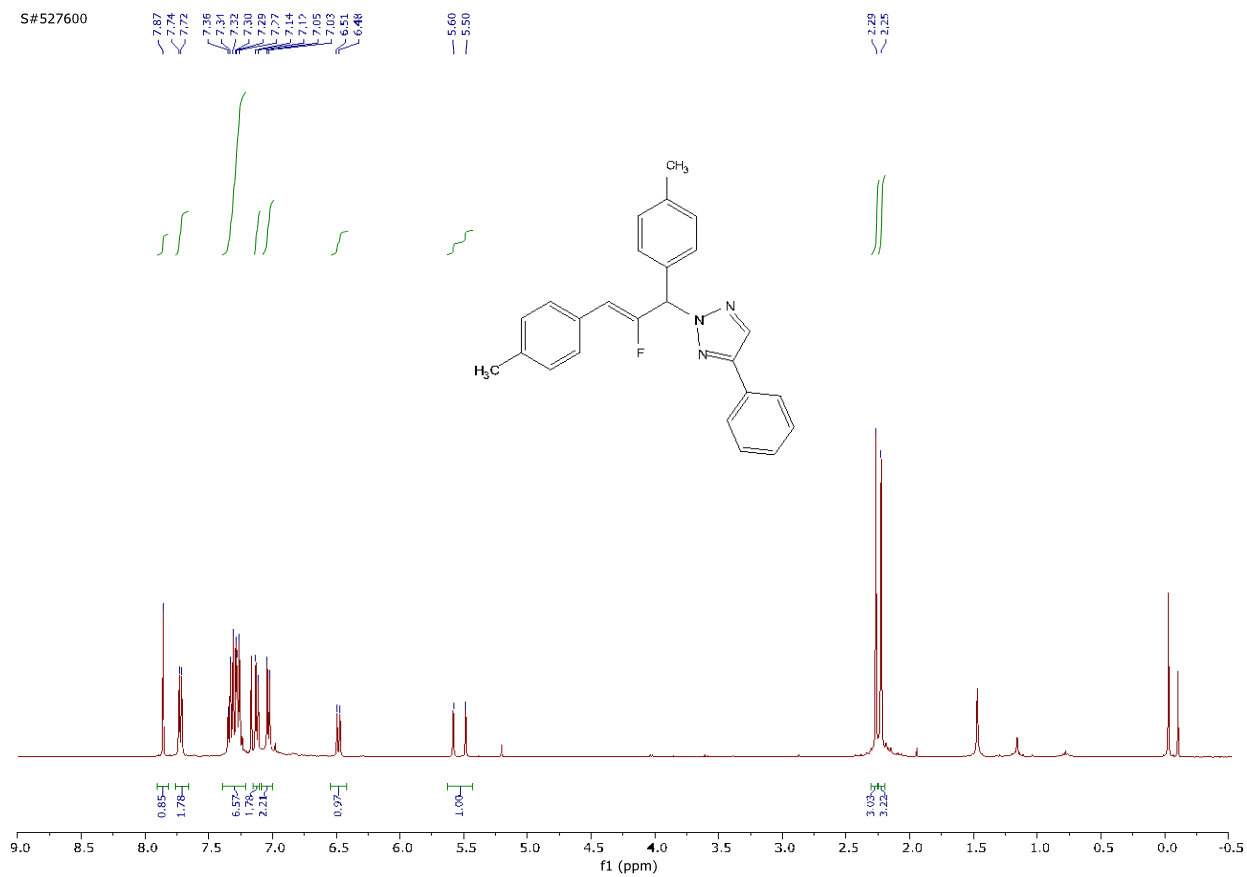

S#434326

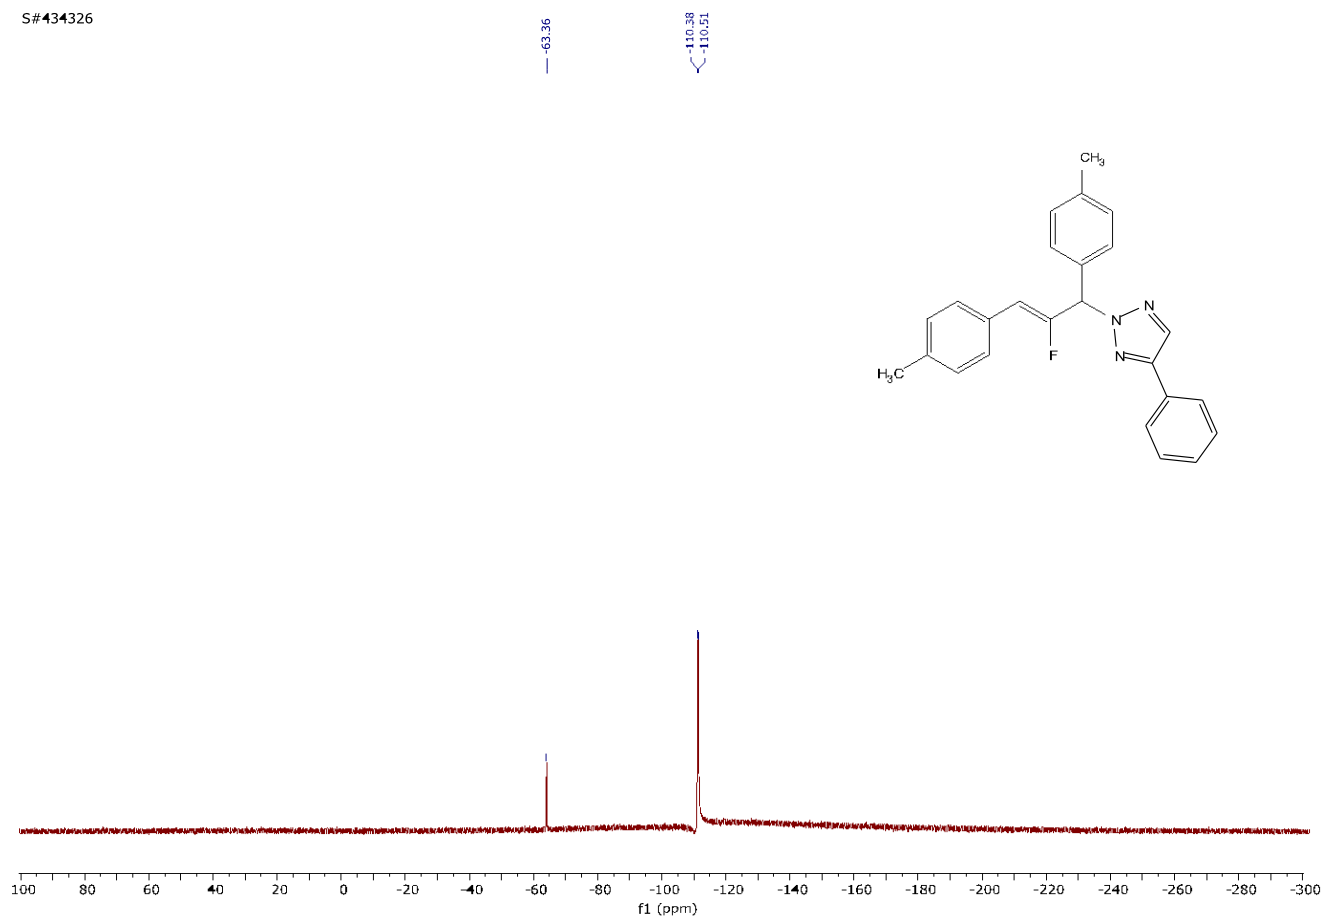

S#498735

7.74  
7.67  
7.65  
7.35  
7.33  
7.16  
7.14  
7.10  
7.08  
6.59  
6.55

5.78  
5.68

2.30  
2.28

-0.00

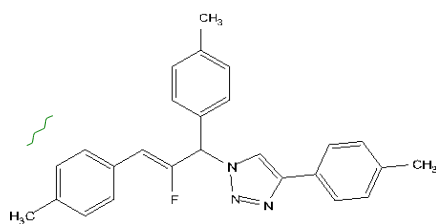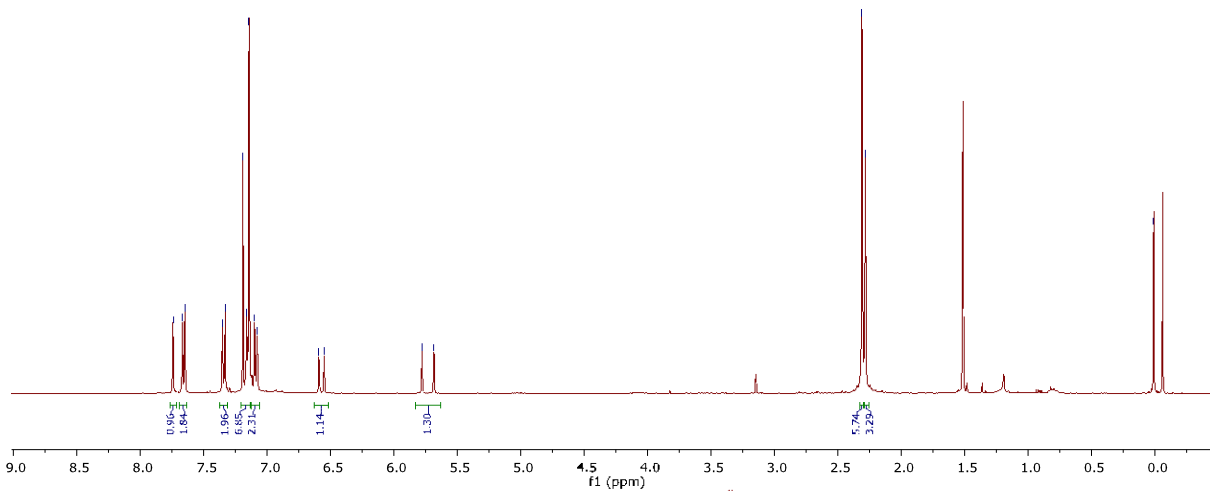

S#399407

single pulse decoupled gated NOE

154.91  
152.78  
148.18  
139.35  
138.50  
138.25  
131.93  
129.98  
129.66  
129.48  
129.16  
129.10  
127.76  
127.52  
125.82  
119.06  
117.04

77.41  
76.91

66.06  
65.83

21.45  
21.32

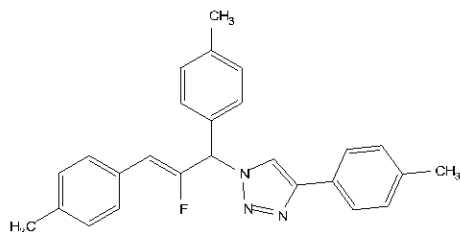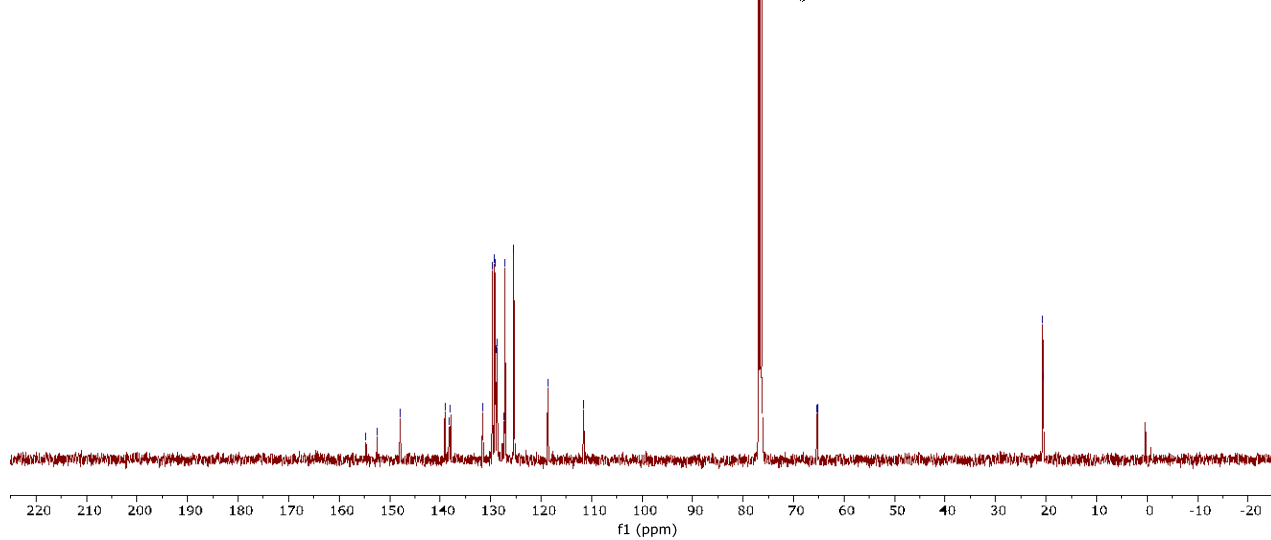

S#478281

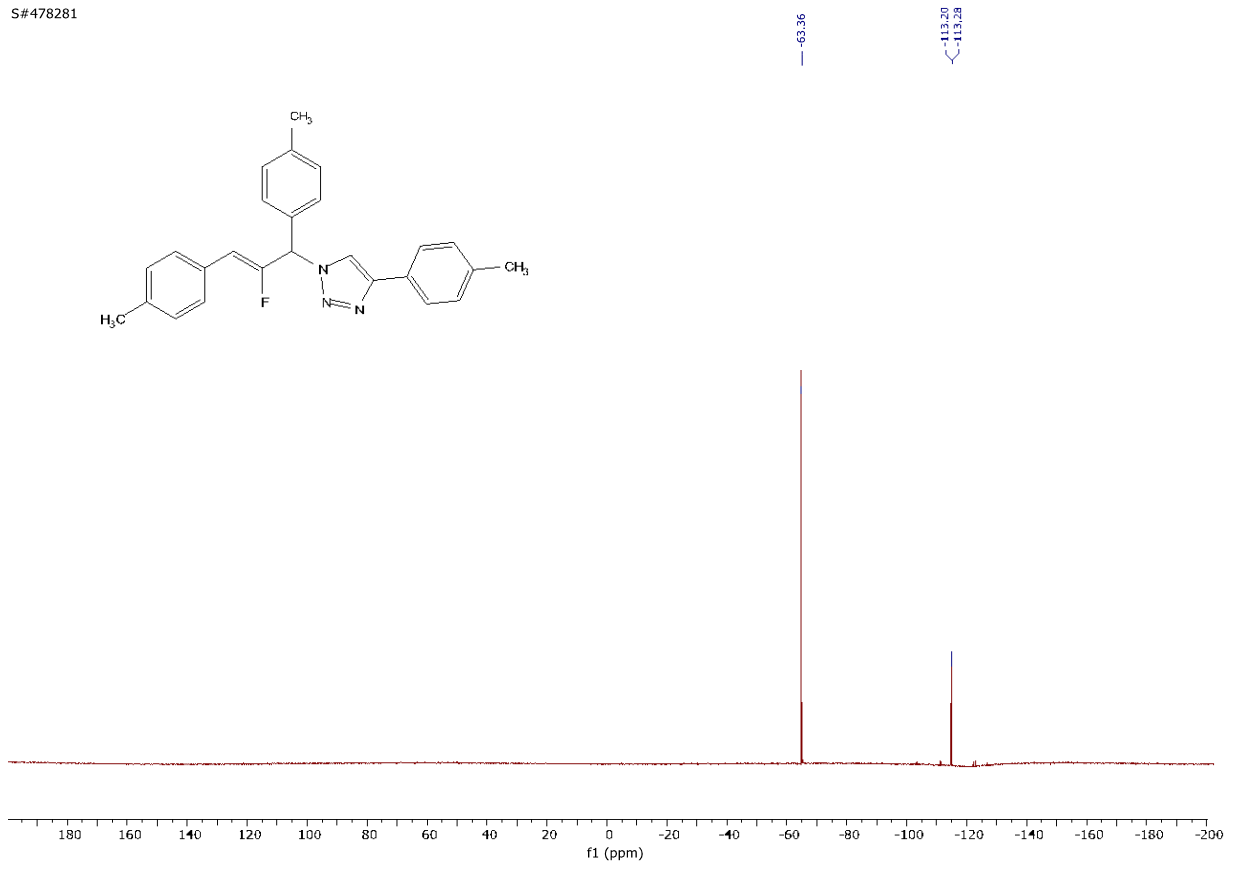



Supplementary Information

S#527812

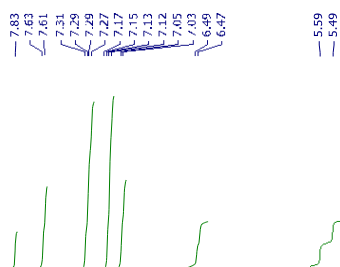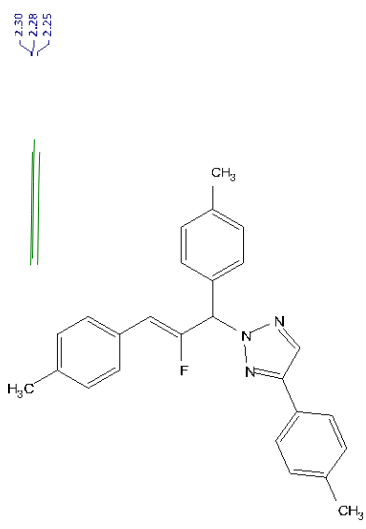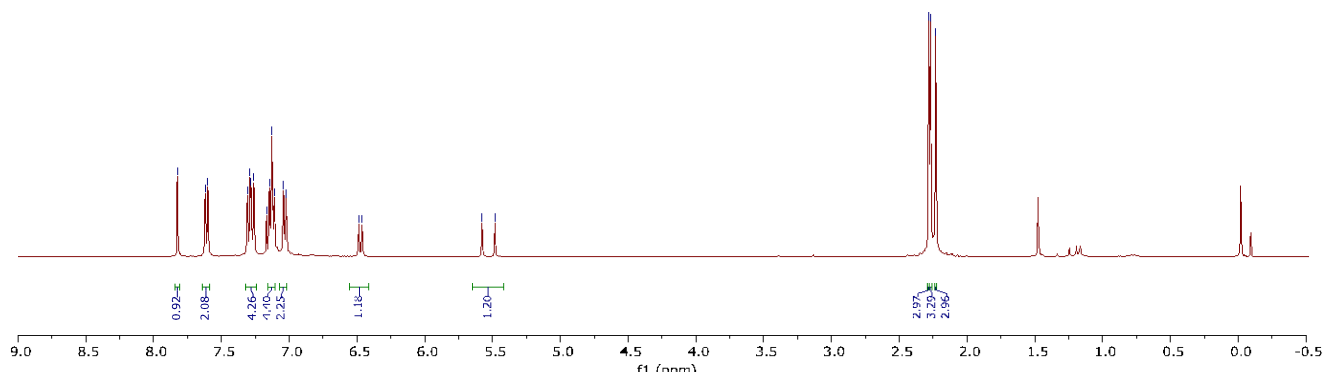

S#604357

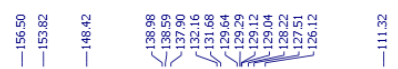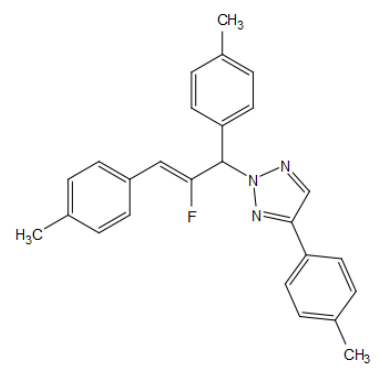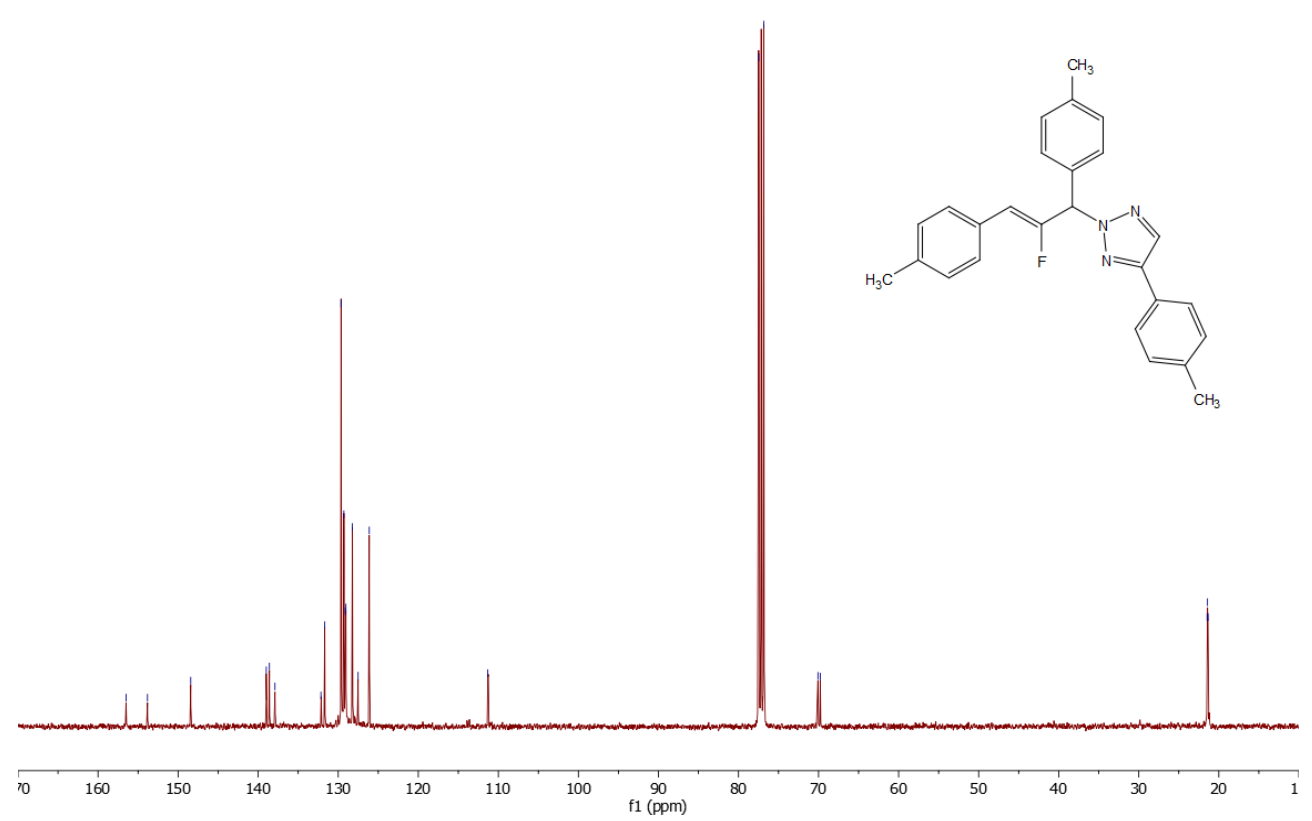

Supplementary Information

S#460461

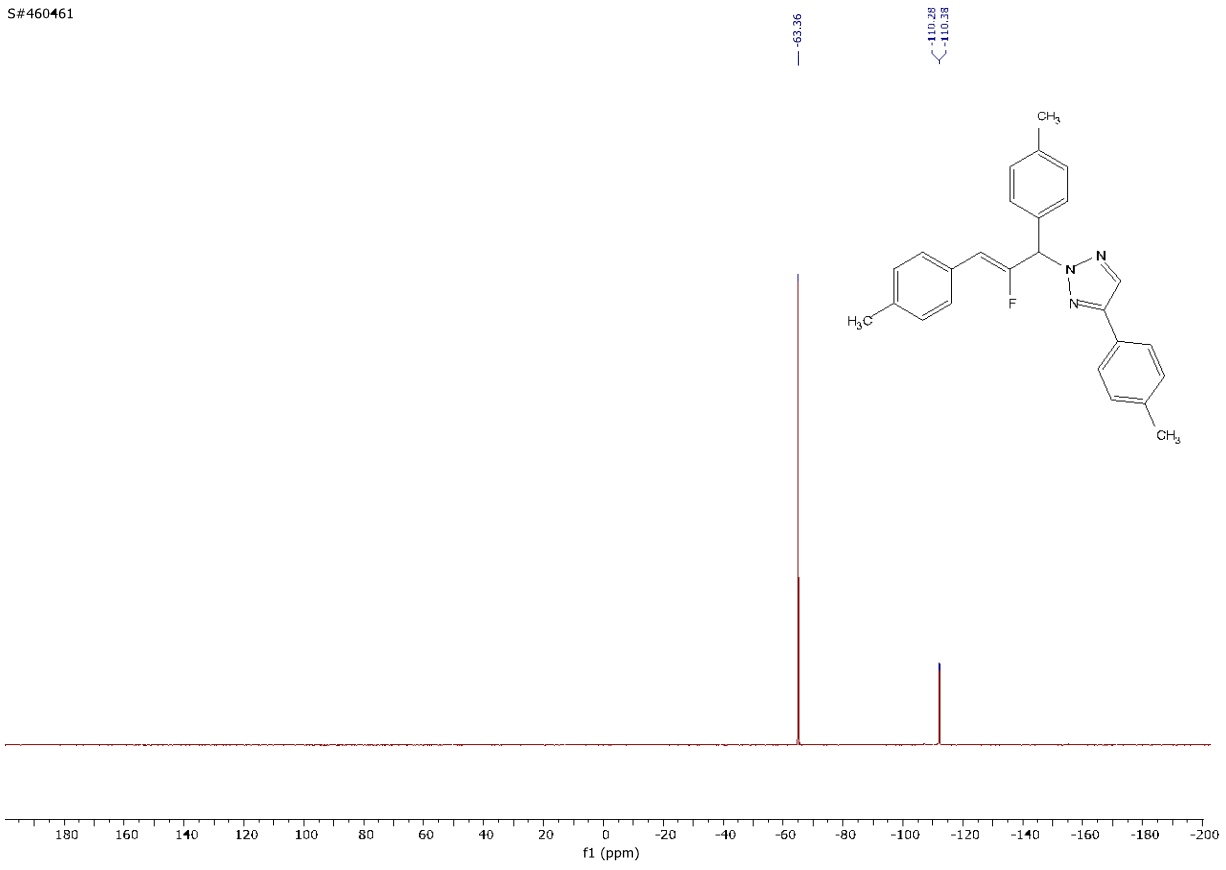

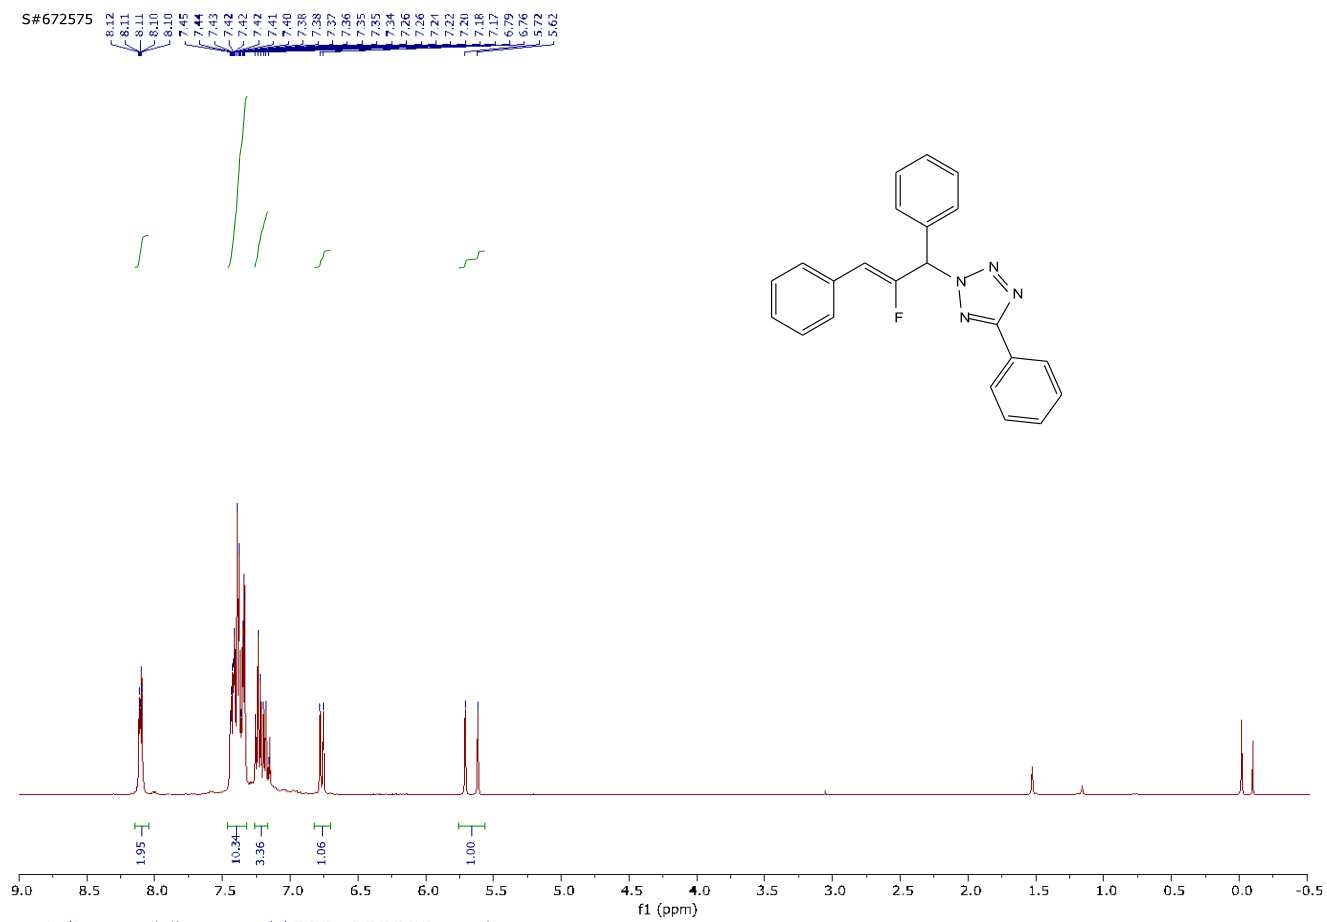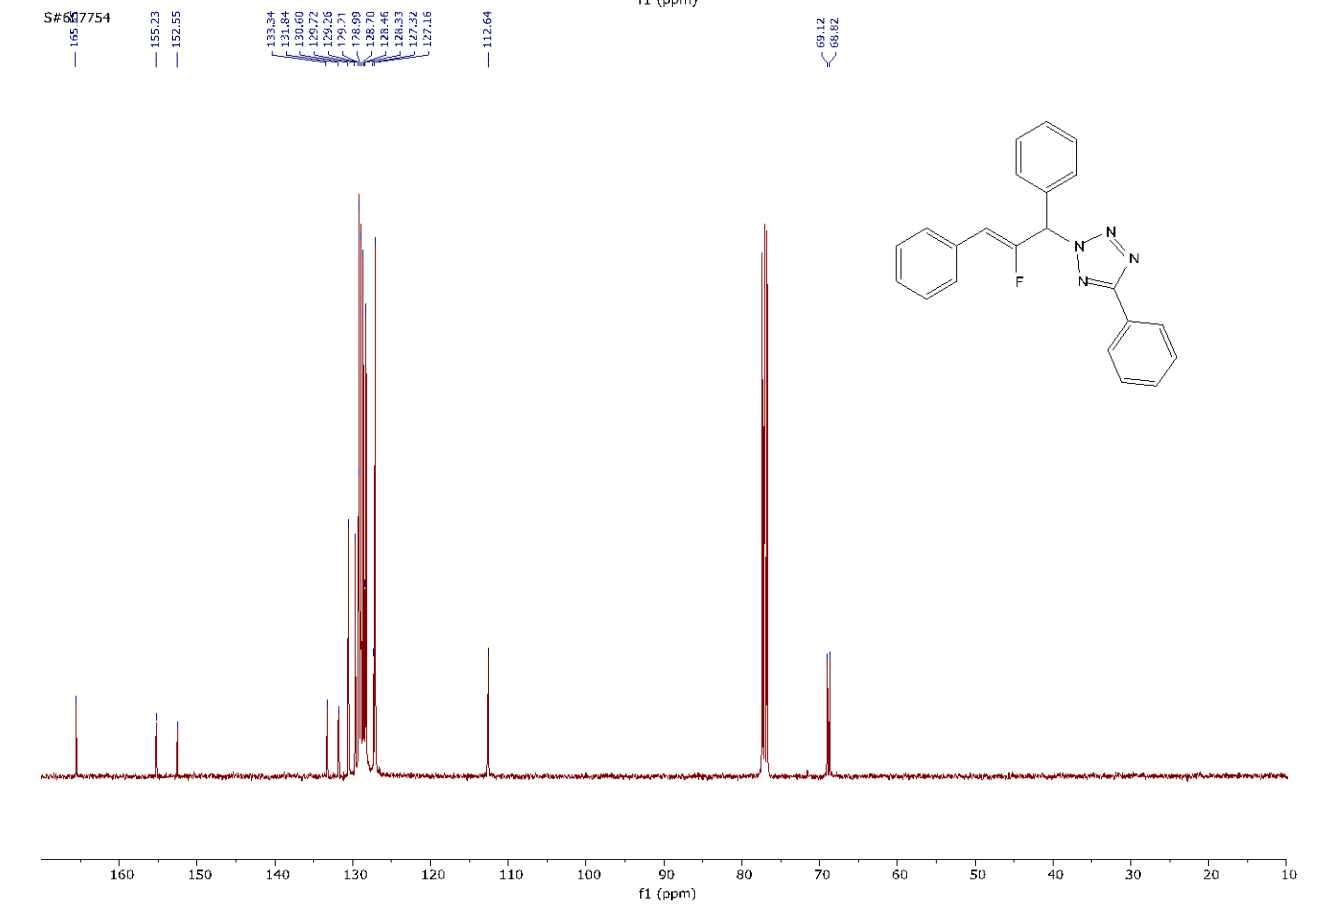

S#434639

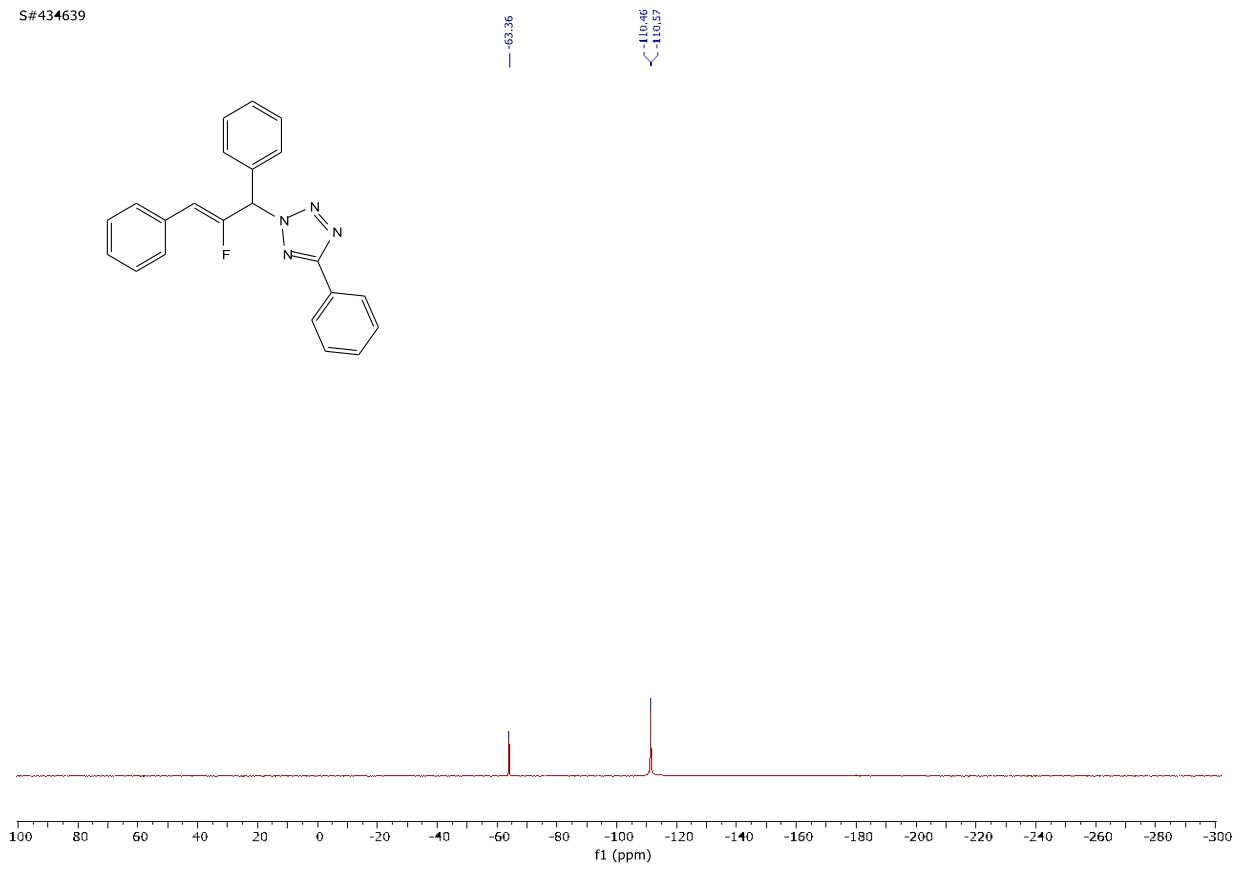

Supplementary Information

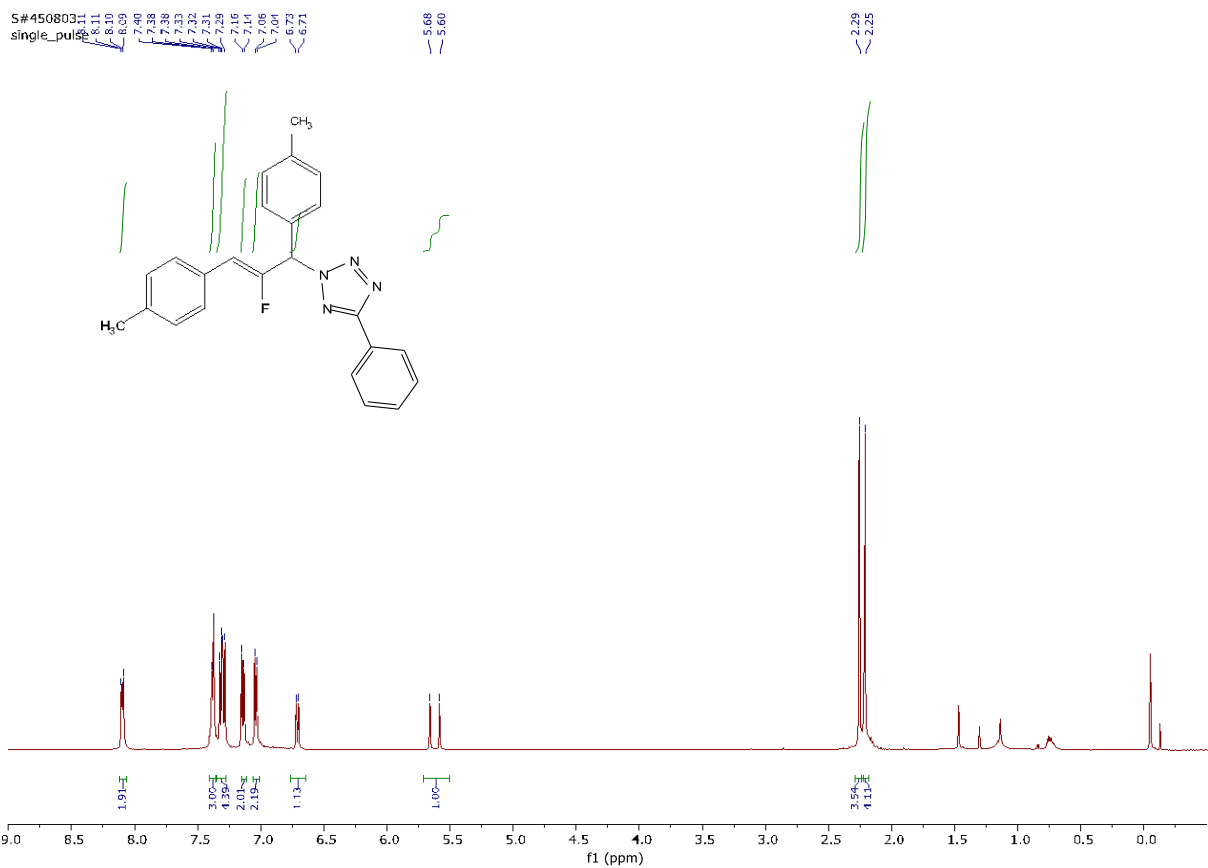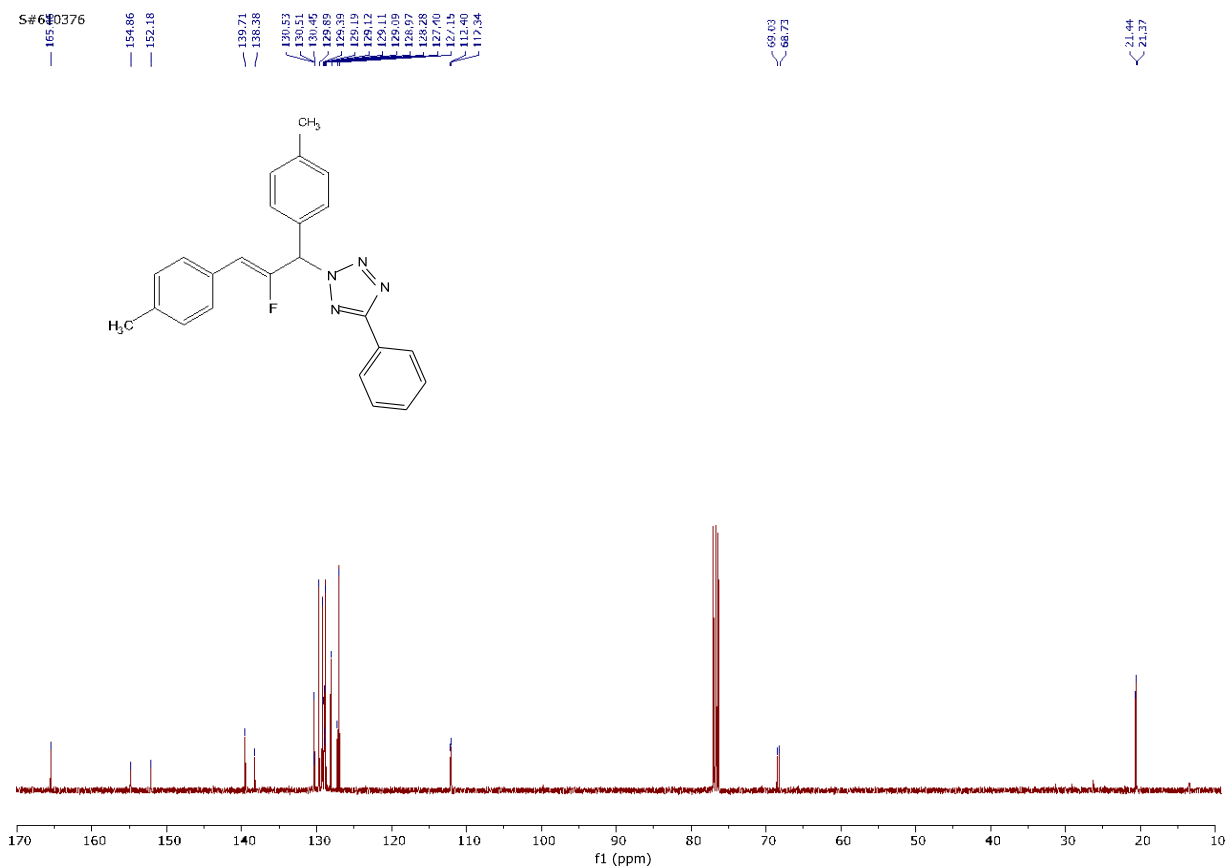

S#547565

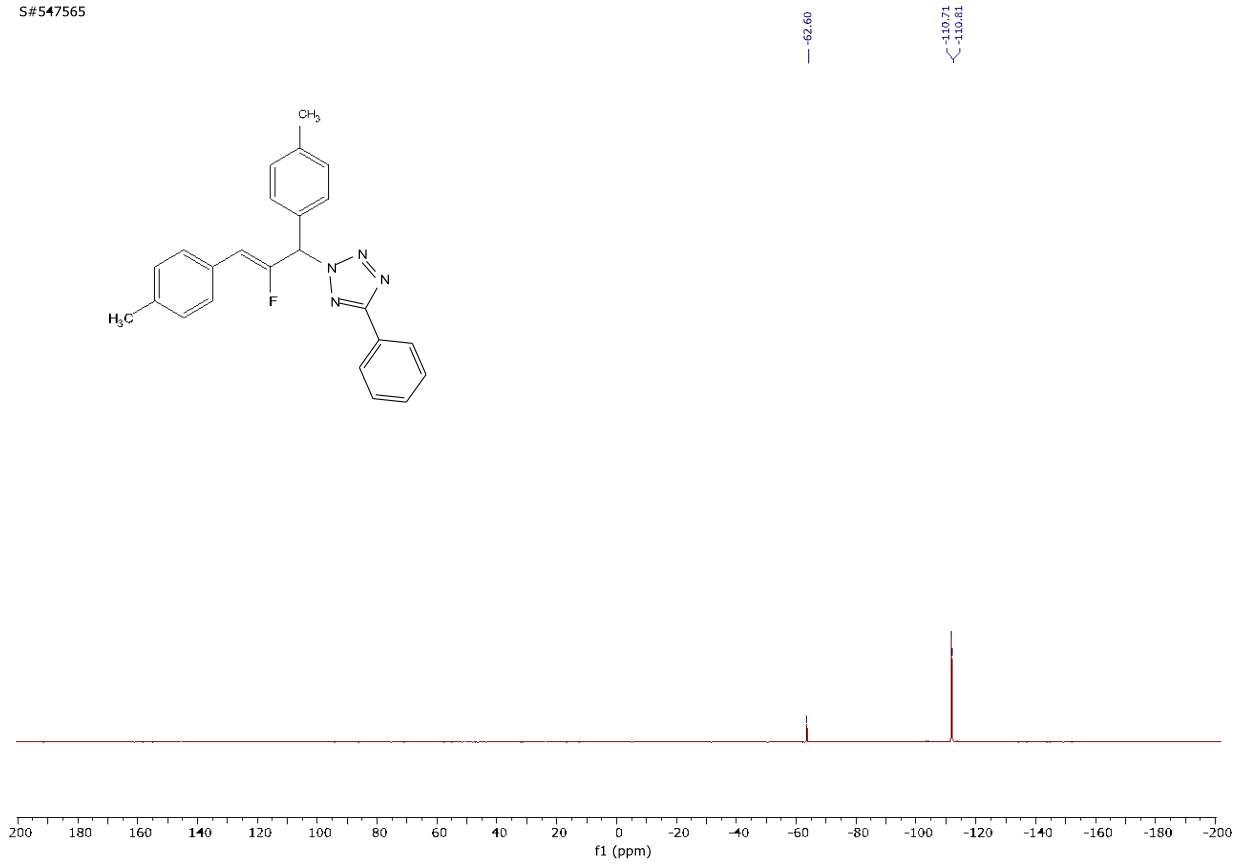

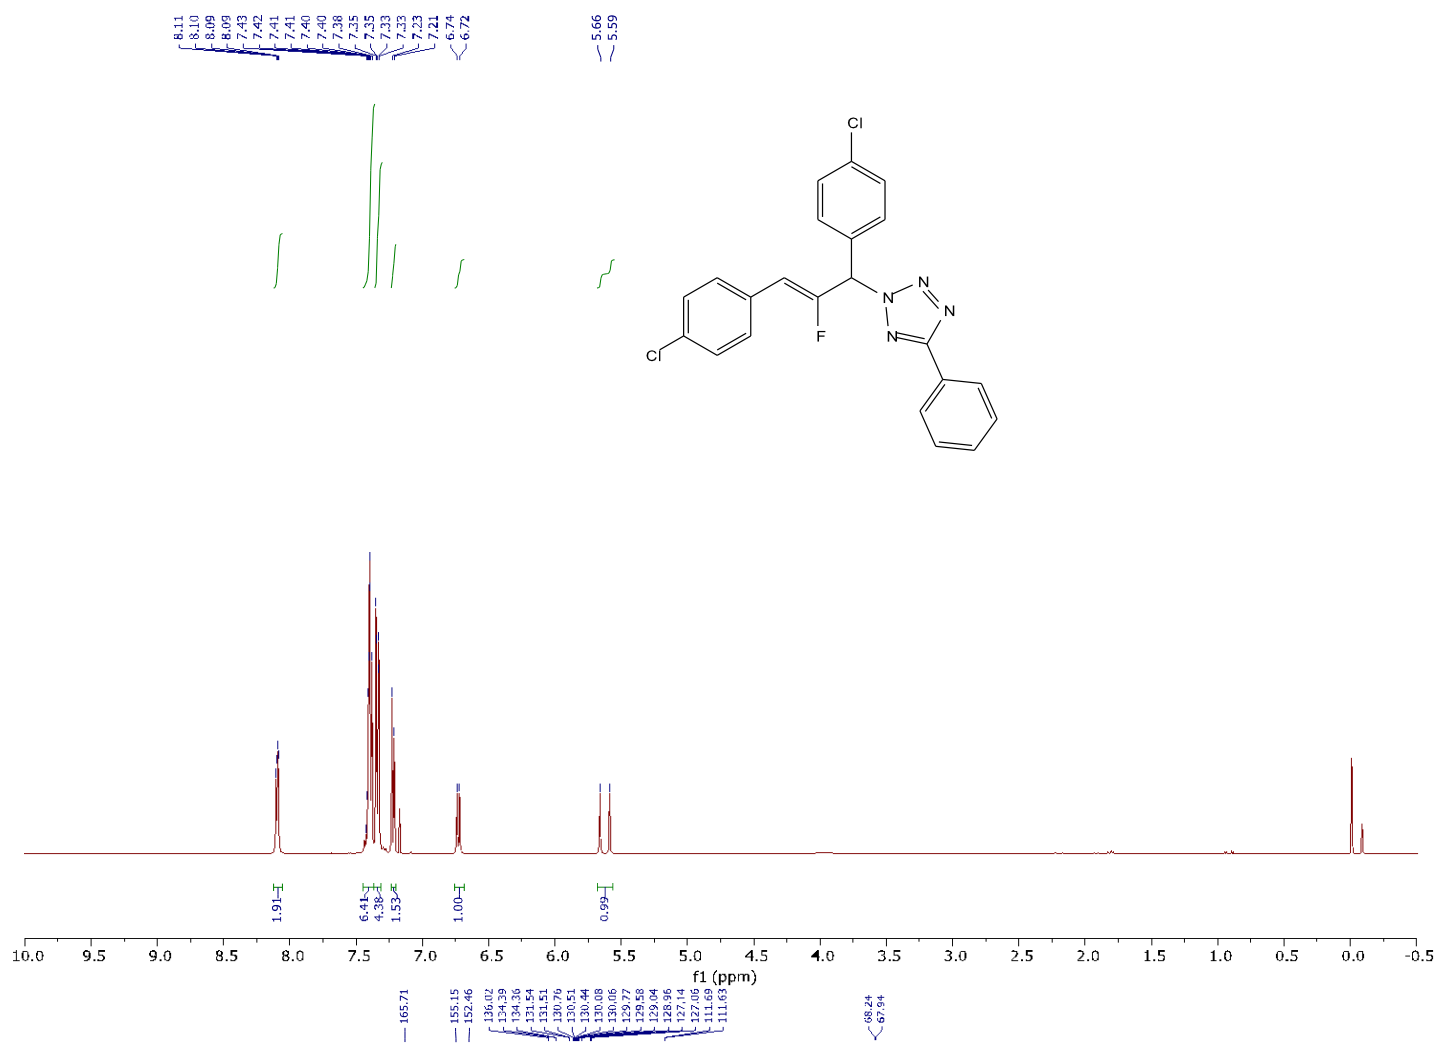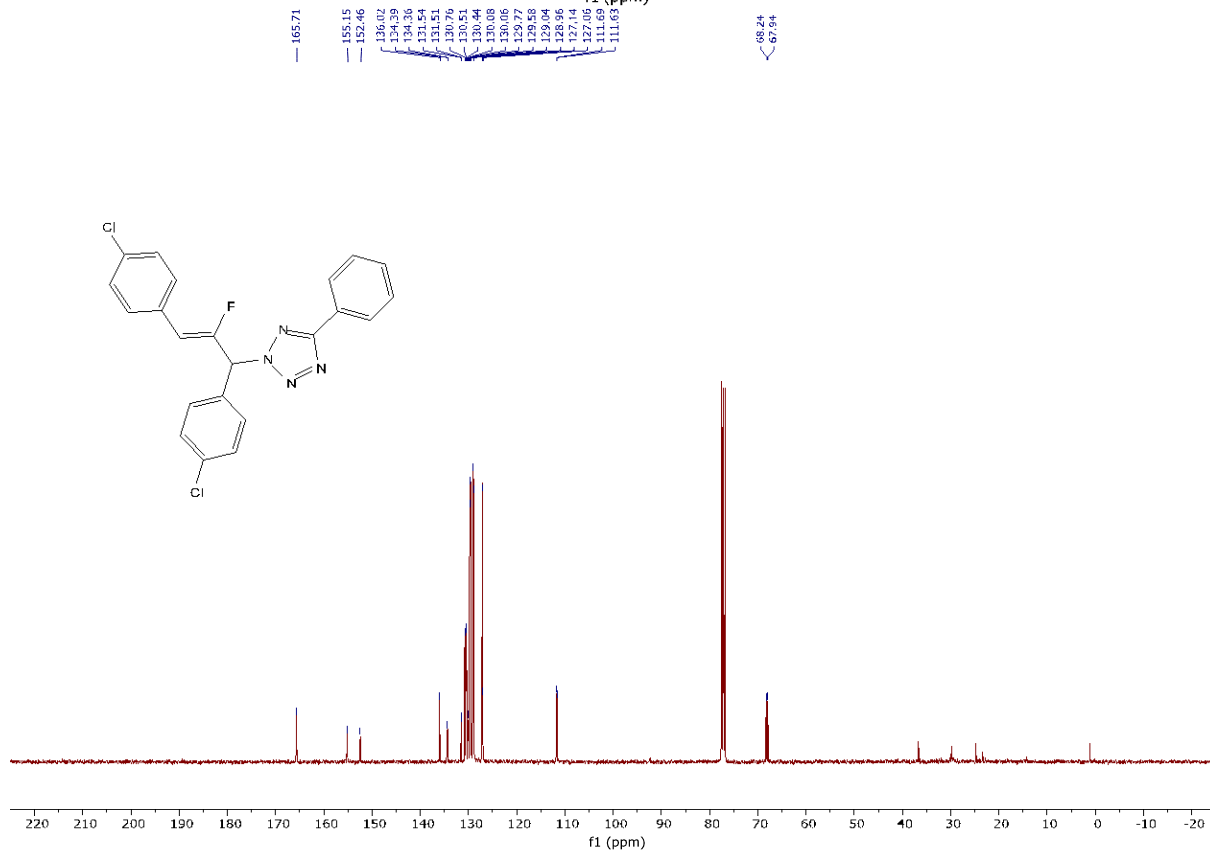

S#589511

63.42

110.10  
110.18

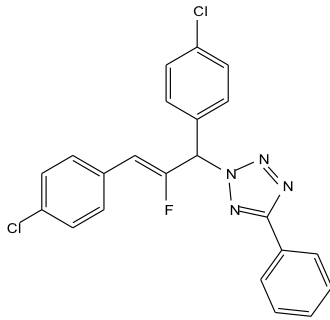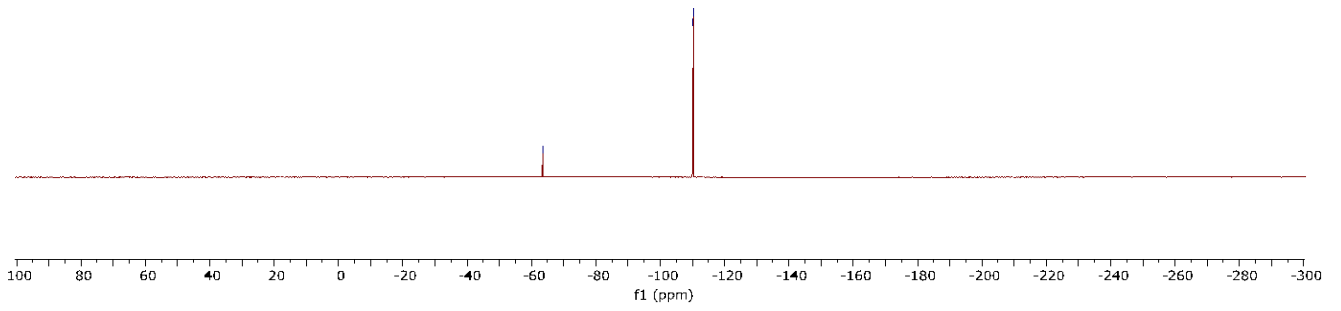



S#455861

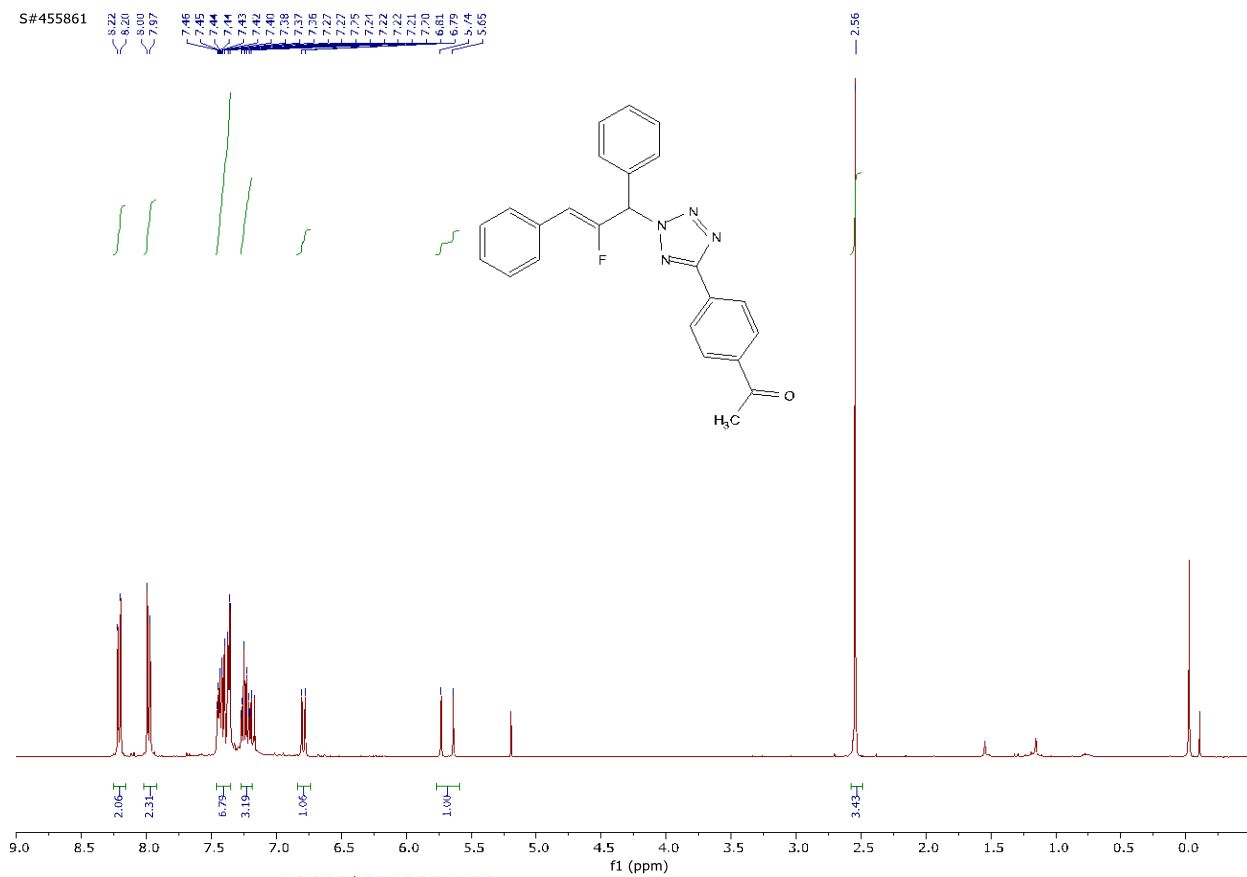

S#611276

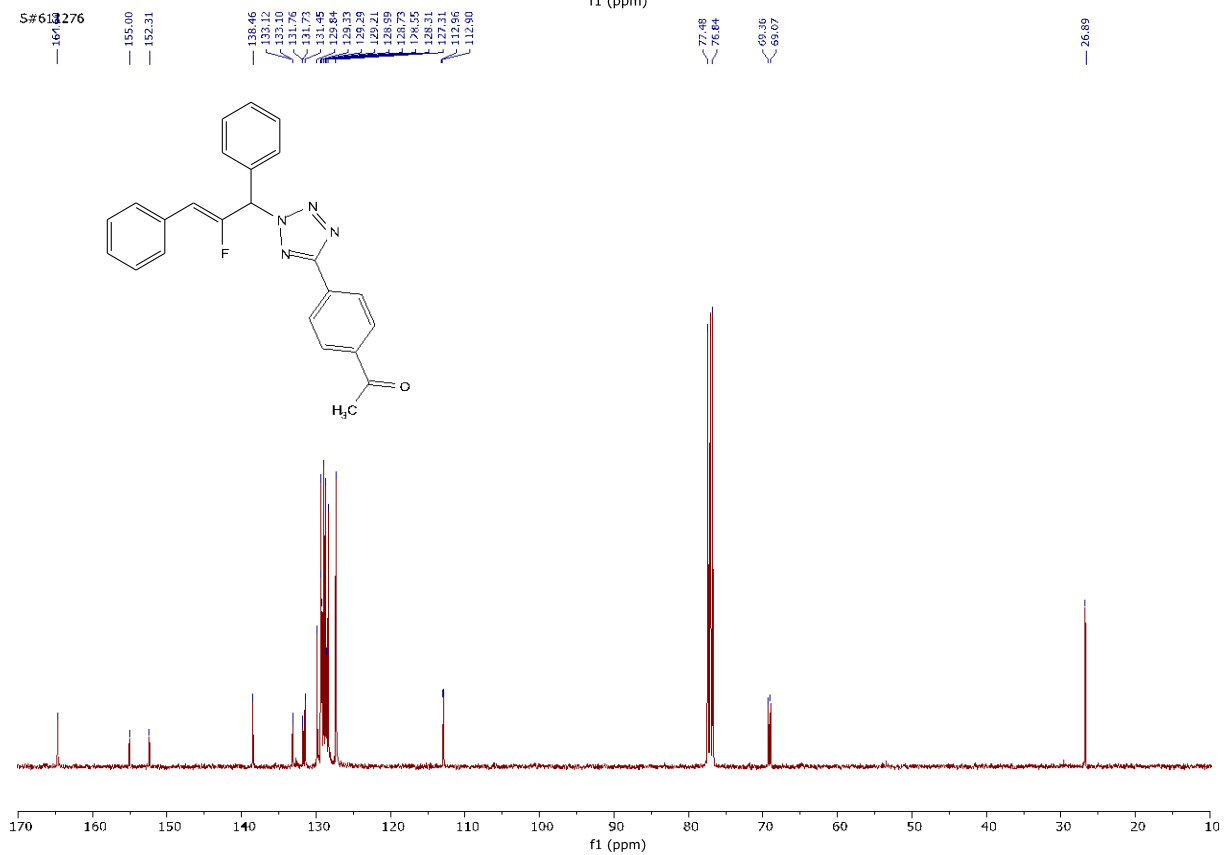

S#481854

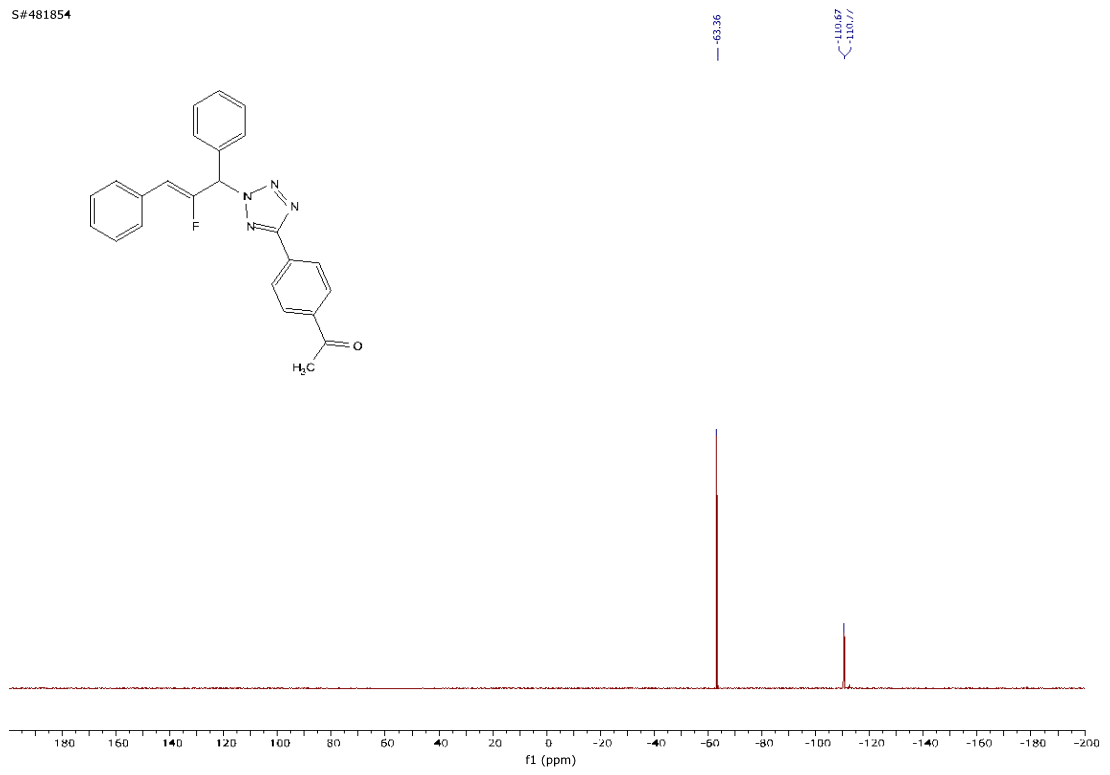

Supplementary Information

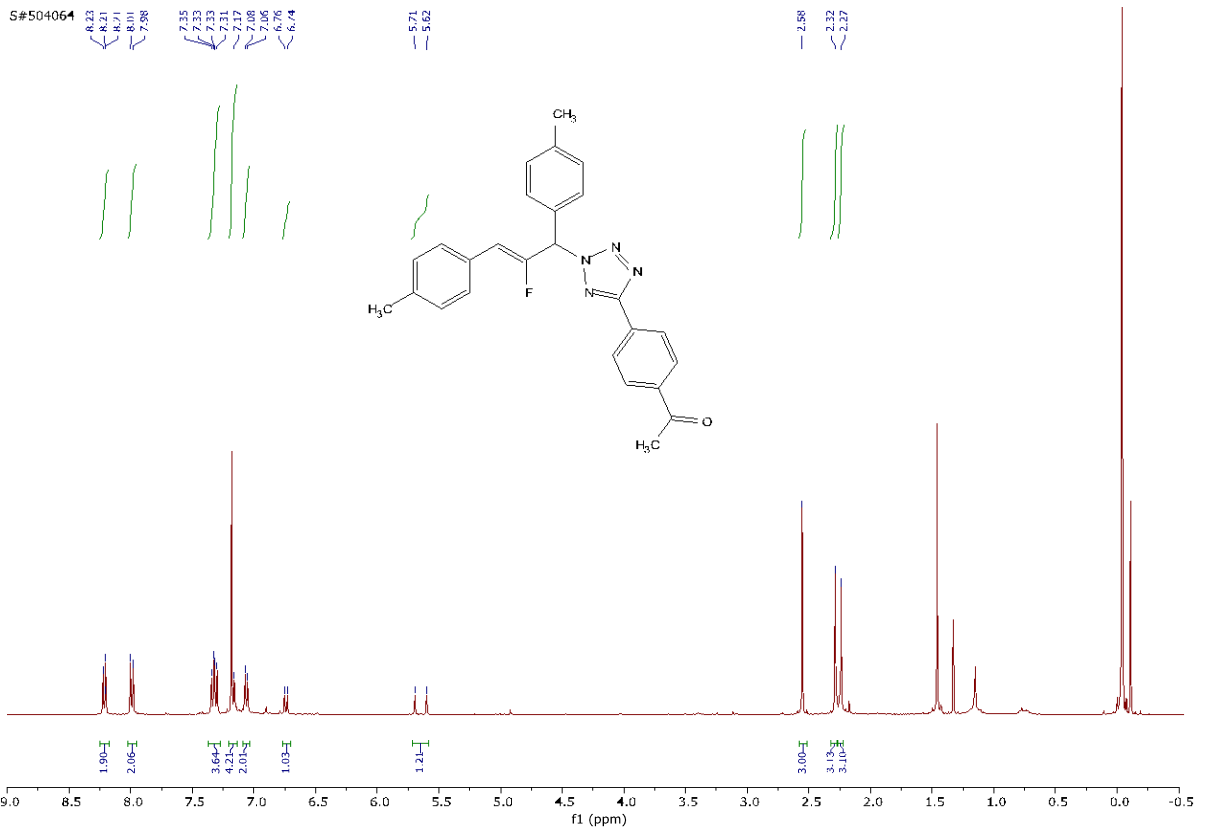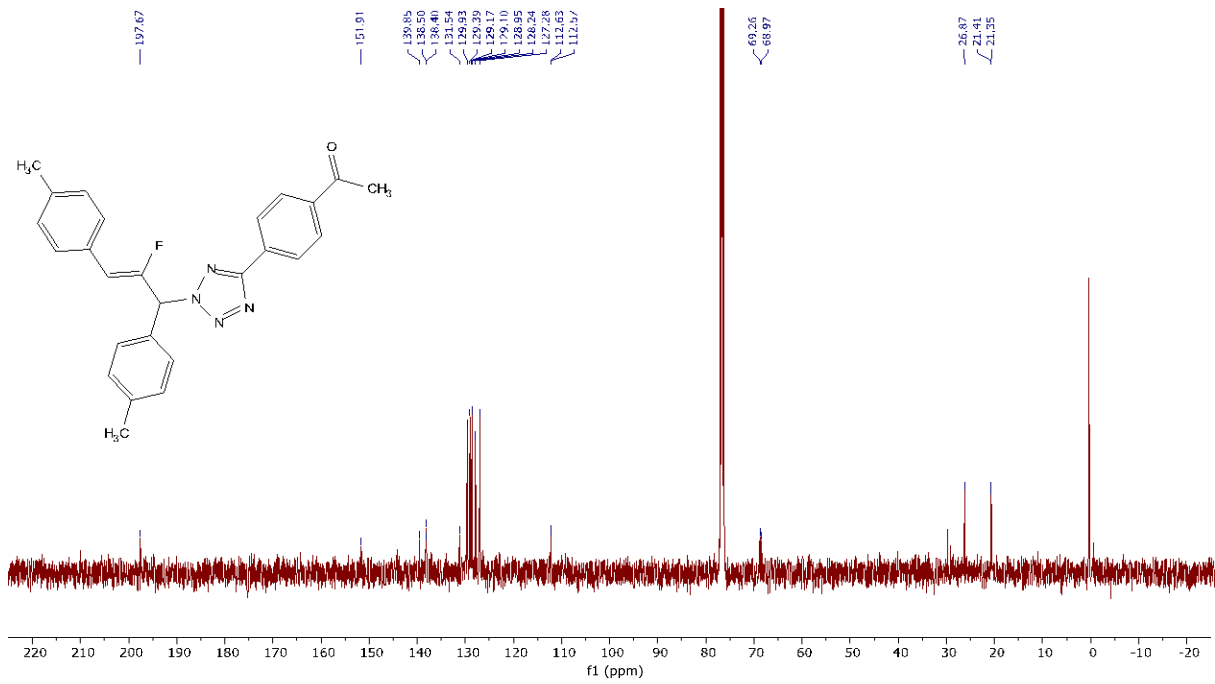

S#545311

-63.44

-111.29  
-111.87  
-111.89  
-111.92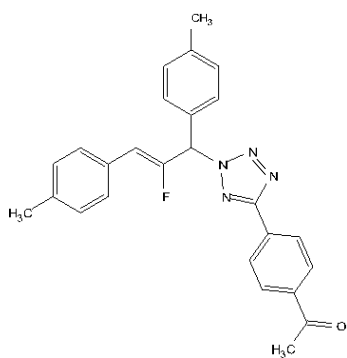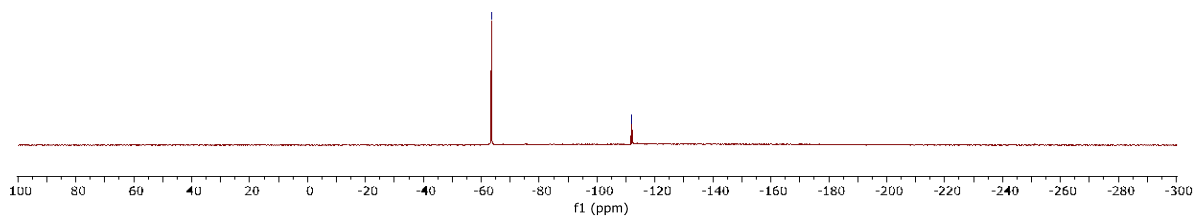

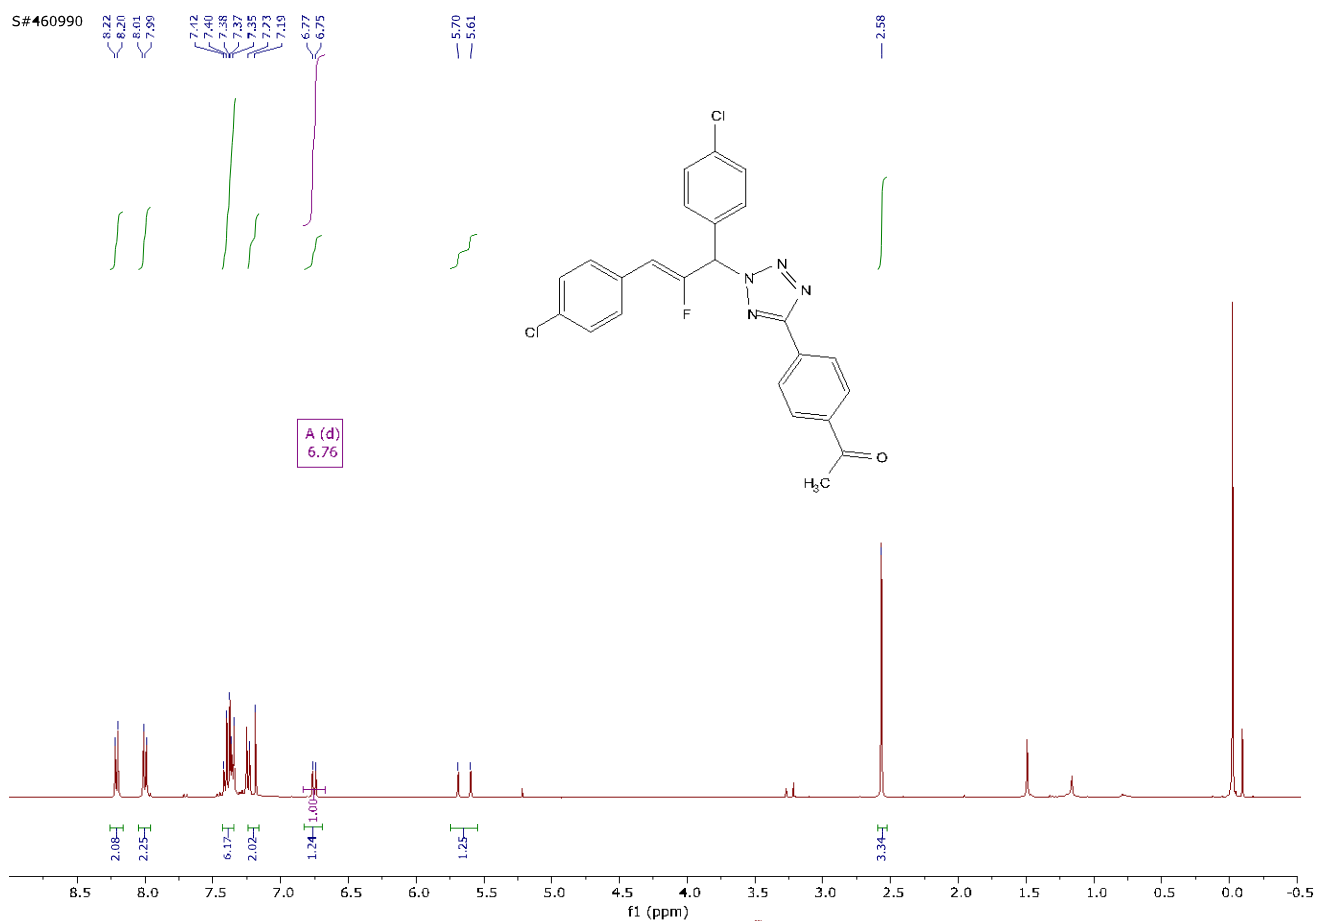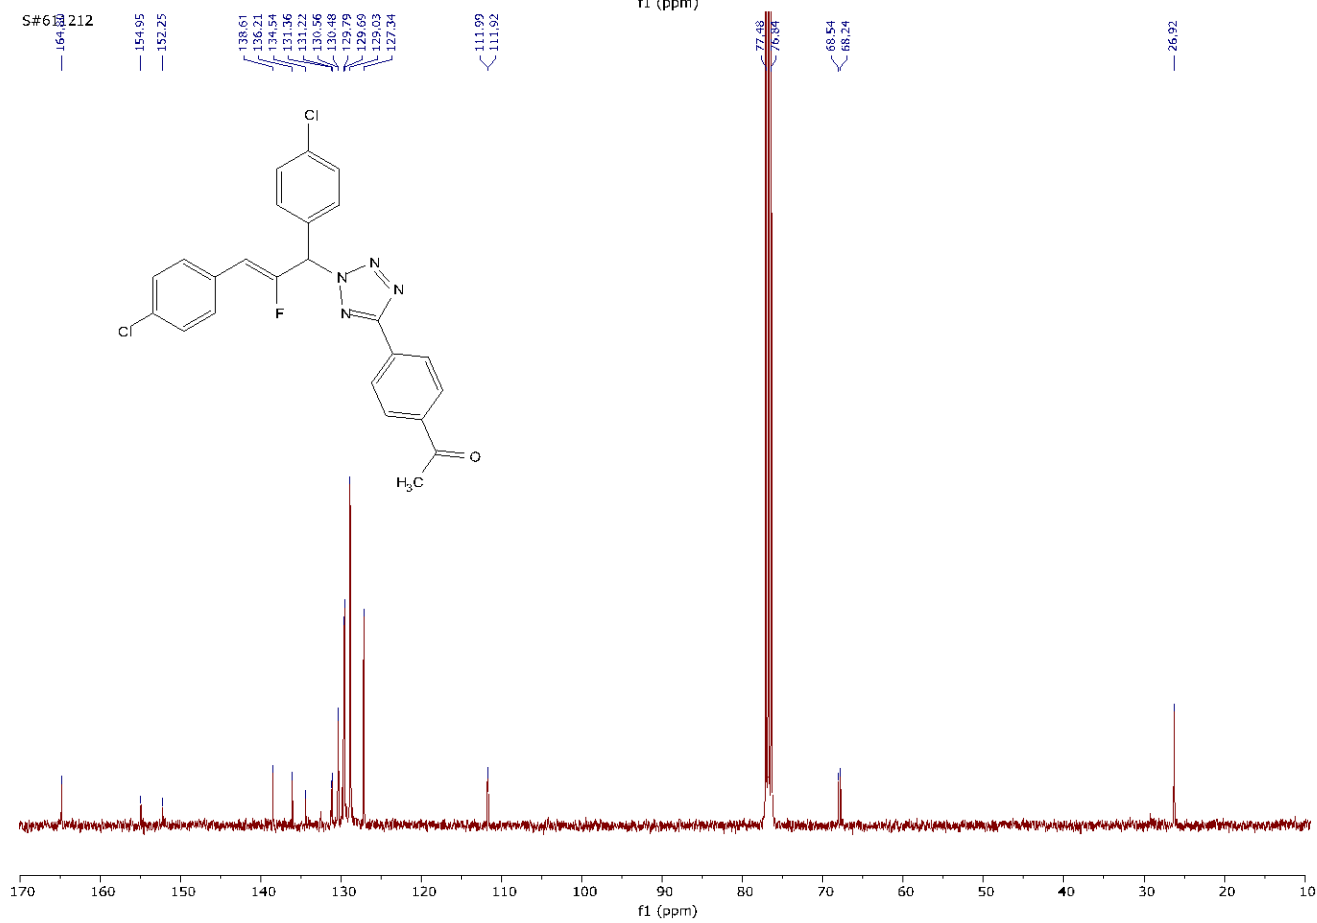

S#464621

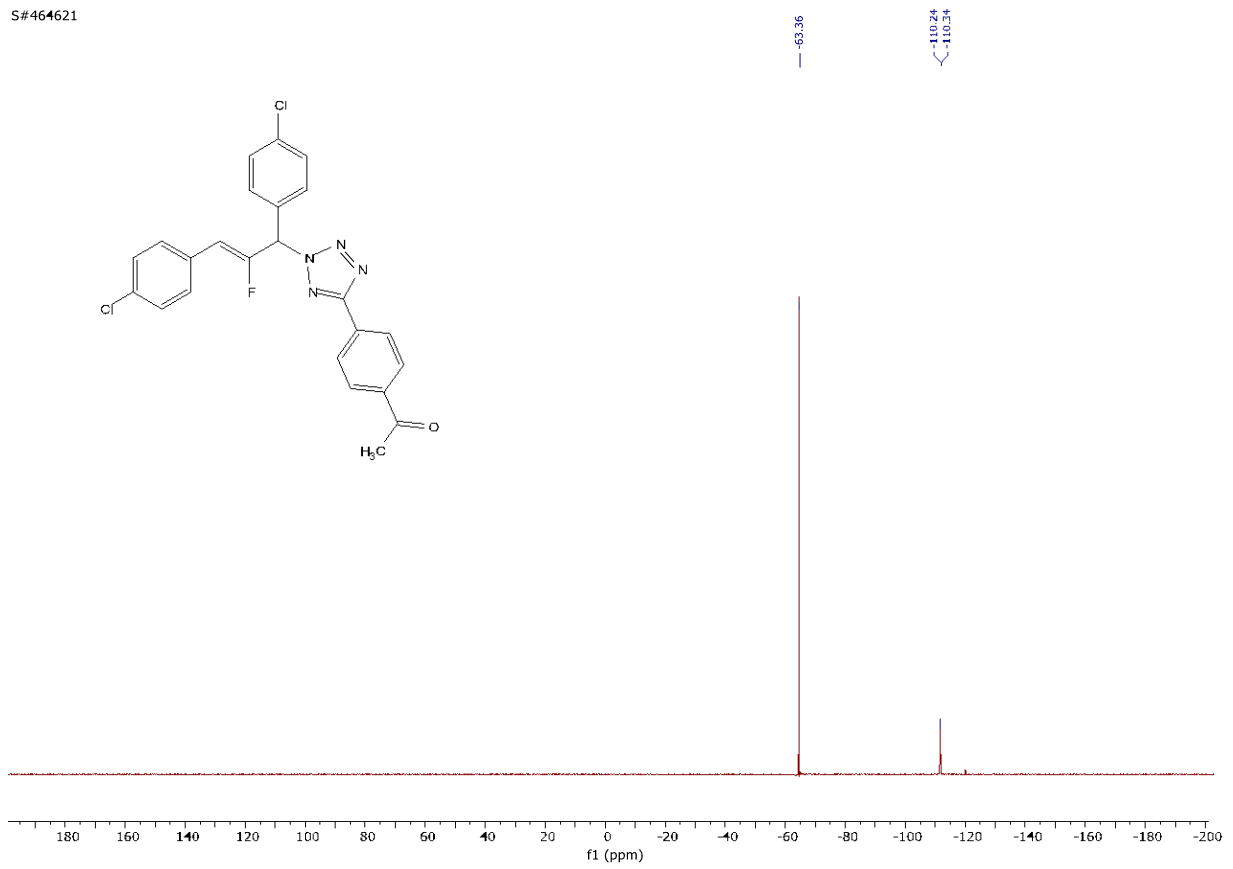

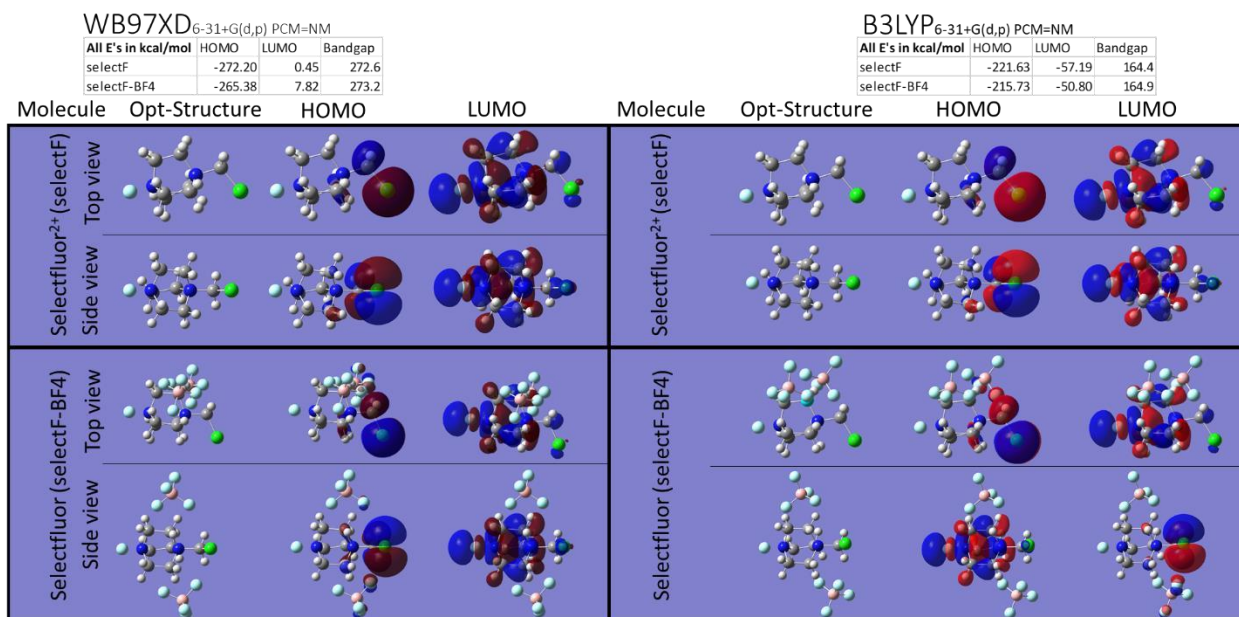

**Figure S1.** Frontier orbital analysis for Selectfluor with and without the counter ions. The left and right panels show calculated frontier orbitals at  $wB97xd/6-31+G(d,p)$  and  $B3LYP/6-31+G(d,p)$  level of theory with the implicit solvation of nitromethane. The top tables show the energies (in kcal/mol) of frontier orbitals and the HOMO-LUMO gap.

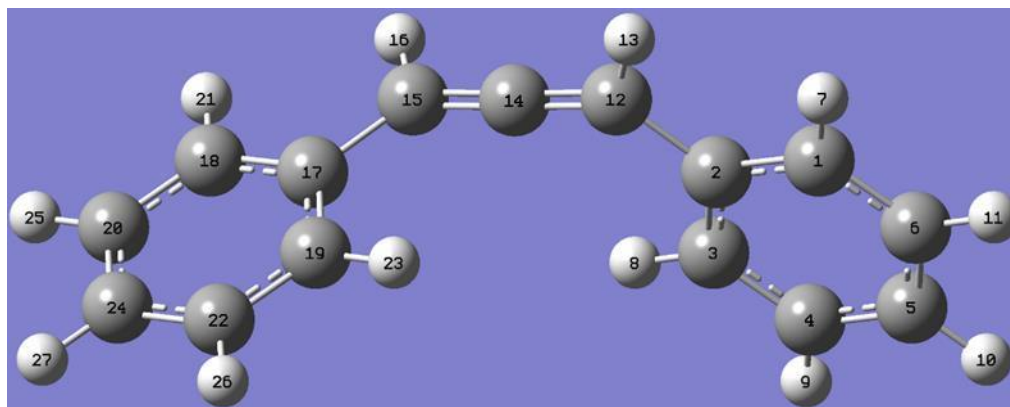

**Figure S2.** Atom numbering for diphenylallene (DPA) to be used in Table S1.

**Table S1.** Calculated NBO charge and spin values (in a.u.) for diphenylallene (DPA) and oxidized DPA using B3LYP and wB97xd functionals with 6-31+G(d,p) basis sets and implicit solvation of nitromethane. Refer to Figure S2 for atom numbering.

| Atom type | Number | DPA (B3LYP)    | Oxidized DPA (B3LYP) |              | DPA (wB97XD)   | Oxidized DPA (wB97XD) |              |
|-----------|--------|----------------|----------------------|--------------|----------------|-----------------------|--------------|
|           |        | Natural Charge | Natural Charge       | Natural spin | Natural Charge | Natural Charge        | Natural spin |
| C         | 1      | -0.232         | -0.178               | 0.05         | -0.24          | -0.219                | -0.009       |
| C         | 2      | -0.077         | -0.078               | 0.063        | -0.079         | -0.098                | 0.03         |
| C         | 3      | -0.23          | -0.177               | 0.062        | -0.237         | -0.221                | -0.007       |
| C         | 4      | -0.246         | -0.243               | -0.027       | -0.252         | -0.248                | 0.005        |
| C         | 5      | -0.253         | -0.163               | 0.114        | -0.26          | -0.237                | -0.008       |
| C         | 6      | -0.247         | -0.241               | -0.019       | -0.252         | -0.249                | 0.005        |
| H         | 7      | 0.252          | 0.269                | -0.001       | 0.259          | 0.267                 | 0            |
| H         | 8      | 0.254          | 0.267                | -0.002       | 0.26           | 0.263                 | 0            |
| H         | 9      | 0.256          | 0.272                | 0.001        | 0.262          | 0.268                 | 0            |
| H         | 10     | 0.255          | 0.269                | -0.003       | 0.261          | 0.267                 | 0            |
| H         | 11     | 0.256          | 0.272                | 0.001        | 0.262          | 0.268                 | 0            |
| C         | 12     | -0.309         | -0.188               | 0.048        | -0.306         | -0.267                | -0.05        |
| H         | 13     | 0.27           | 0.311                | 0.018        | 0.276          | 0.324                 | 0.028        |
| C         | 14     | 0.098          | 0.228                | 0.394        | 0.1            | 0.239                 | 0.378        |
| C         | 15     | -0.298         | -0.205               | 0.048        | -0.317         | -0.213                | 0.056        |
| H         | 16     | 0.268          | 0.309                | 0.018        | 0.277          | 0.305                 | 0            |
| C         | 17     | -0.08          | -0.071               | 0.063        | -0.076         | 0.003                 | 0.153        |
| C         | 18     | -0.232         | -0.178               | 0.05         | -0.24          | -0.154                | 0.124        |
| C         | 19     | -0.23          | -0.177               | 0.062        | -0.237         | -0.146                | 0.146        |
| C         | 20     | -0.247         | -0.24                | -0.019       | -0.252         | -0.249                | -0.059       |
| H         | 21     | 0.252          | 0.269                | -0.001       | 0.259          | 0.285                 | -0.004       |
| C         | 22     | -0.246         | -0.243               | -0.027       | -0.252         | -0.257                | -0.076       |
| H         | 23     | 0.254          | 0.267                | -0.002       | 0.26           | 0.284                 | -0.005       |
| C         | 24     | -0.253         | -0.163               | 0.114        | -0.26          | -0.078                | 0.299        |
| H         | 25     | 0.256          | 0.272                | 0.001        | 0.262          | 0.289                 | 0.001        |
| H         | 26     | 0.256          | 0.272                | 0.001        | 0.262          | 0.289                 | 0.002        |
| H         | 27     | 0.255          | 0.269                | -0.003       | 0.261          | 0.283                 | -0.009       |



**Figure S3.** Reaction energetics (free energies) for various steps in the proposed reaction mechanisms. Level of theories are provided in the description.

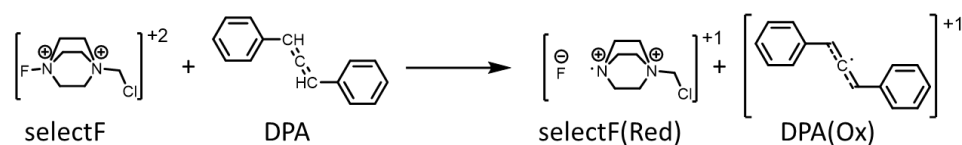

**WB97XD/6-31+G(d,p) PCM=NM**

| Molecule                                  | Free Energy (kcal/mol) |
|-------------------------------------------|------------------------|
| DPA                                       | -363083.49             |
| DPA(Ox)                                   | -362939.45             |
| selectF                                   | -592459.47             |
| selectF(Red)                              | -592586.13             |
| <b><math>\Delta G</math> Prod - React</b> | <b>17.37</b>           |

**B3LYP/6-31+G(d,p) PCM=NM**

| Molecule                                  | Free Energy (kcal/mol) |
|-------------------------------------------|------------------------|
| DPA                                       | -363217.35             |
| DPA(Ox)                                   | -363077.67             |
| selectF                                   | -592549.27             |
| selectF(Red)                              | -592680.95             |
| <b><math>\Delta G</math> Prod - React</b> | <b>8.00</b>            |

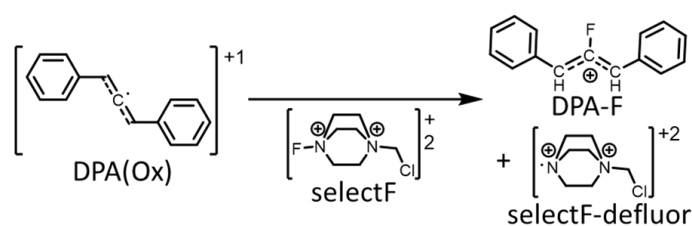

**WB97XD/6-31+G(d,p) PCM=NM**

| Molecule                                  | Free Energy (kcal/mol) |
|-------------------------------------------|------------------------|
| DPA(Ox)                                   | -362939.45             |
| selectF                                   | -592459.47             |
| selectF-defluor                           | -529832.46             |
| DPA-F                                     | -425601.90             |
| <b><math>\Delta G</math> Prod - React</b> | <b>-35.44</b>          |

**B3LYP/6-31+G(d,p) PCM=NM**

| Molecule                                  | Free Energy (kcal/mol) |
|-------------------------------------------|------------------------|
| DPA(Ox)                                   | -363077.67             |
| selectF                                   | -592549.27             |
| selectF-defluor                           | -529908.20             |
| DPA-F                                     | -425753.47             |
| <b><math>\Delta G</math> Prod - React</b> | <b>-34.72</b>          |

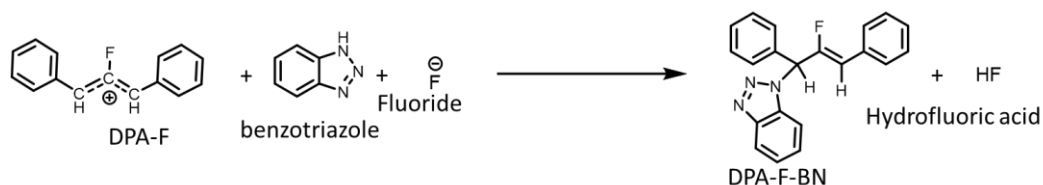

**WB97XD/6-31+G(d,p) PCM=NM**

| Molecule                                  | Free Energy (kcal/mol) |
|-------------------------------------------|------------------------|
| DPA-F                                     | -425601.90             |
| benzotriazole                             | -248346.54             |
| Fluoride                                  | -62726.42              |
| DPA-F-BN                                  | -673717.02             |
| HF                                        | -63020.94              |
| <b><math>\Delta G</math> Prod - React</b> | <b>-63.10</b>          |

**B3LYP/6-31+G(d,p) PCM=NM**

| Molecule                                  | Free Energy (kcal/mol) |
|-------------------------------------------|------------------------|
| DPA-F                                     | -425753.47             |
| benzotriazole                             | -248433.77             |
| Fluoride                                  | -62746.48              |
| DPA-F-BN                                  | -673942.31             |
| HF                                        | -63037.98              |
| <b><math>\Delta G</math> Prod - React</b> | <b>-46.57</b>          |

**Coordinates of Optimized Geometries**

b3lyp-benzotriazole

| Center Number | Atomic Number | Atomic Type | Coordinates |           |           |
|---------------|---------------|-------------|-------------|-----------|-----------|
|               |               |             | X           | Y         | Z         |
| 1             | 6             | 0           | -2.111938   | -0.692378 | 0.000023  |
| 2             | 6             | 0           | -2.090638   | 0.728310  | 0.000126  |
| 3             | 6             | 0           | -0.903882   | 1.447910  | 0.000152  |
| 4             | 6             | 0           | 0.278807    | 0.689504  | 0.000073  |
| 5             | 6             | 0           | 0.271637    | -0.721284 | -0.000059 |
| 6             | 6             | 0           | -0.941352   | -1.435347 | -0.000065 |
| 7             | 1             | 0           | -3.070674   | -1.201252 | 0.000031  |
| 8             | 1             | 0           | -3.033965   | 1.265698  | 0.000161  |
| 9             | 1             | 0           | -0.891492   | 2.532176  | 0.000184  |
| 10            | 1             | 0           | -0.951217   | -2.520292 | -0.000175 |
| 11            | 7             | 0           | 1.579371    | -1.163725 | -0.000112 |
| 12            | 7             | 0           | 2.364430    | -0.128100 | -0.000082 |
| 13            | 7             | 0           | 1.608753    | 0.995353  | -0.000054 |
| 14            | 1             | 0           | 2.063659    | 1.898678  | 0.000035  |

b3lyp-Ox-benzotriazole

| Center Number | Atomic Number | Atomic Type | Coordinates |           |           |
|---------------|---------------|-------------|-------------|-----------|-----------|
|               |               |             | X           | Y         | Z         |
| 1             | 6             | 0           | -2.110787   | -0.706035 | 0.000035  |
| 2             | 6             | 0           | -2.132147   | 0.691377  | 0.000120  |
| 3             | 6             | 0           | -0.946120   | 1.432068  | 0.000119  |
| 4             | 6             | 0           | 0.273605    | 0.686556  | 0.000031  |
| 5             | 6             | 0           | 0.297012    | -0.727065 | -0.000055 |
| 6             | 6             | 0           | -0.878567   | -1.452204 | -0.000052 |
| 7             | 1             | 0           | -3.044989   | -1.256139 | 0.000032  |
| 8             | 1             | 0           | -3.082718   | 1.211078  | 0.000189  |
| 9             | 1             | 0           | -0.943929   | 2.515914  | 0.000188  |
| 10            | 1             | 0           | -0.886809   | -2.536572 | -0.000124 |
| 11            | 7             | 0           | 1.626465    | -1.136081 | -0.000149 |
| 12            | 7             | 0           | 2.375164    | -0.098273 | -0.000095 |
| 13            | 7             | 0           | 1.562192    | 1.029668  | 0.000023  |
| 14            | 1             | 0           | 1.993725    | 1.950344  | 0.000077  |

wb97xd-benzotriazole

| Center Number | Atomic Number | Atomic Type | Coordinates |           |           |
|---------------|---------------|-------------|-------------|-----------|-----------|
|               |               |             | X           | Y         | Z         |
| 1             | 6             | 0           | -2.104398   | -0.690982 | -0.000012 |
| 2             | 6             | 0           | -2.082299   | 0.728023  | 0.000014  |
| 3             | 6             | 0           | -0.901320   | 1.444135  | 0.000028  |
| 4             | 6             | 0           | 0.278676    | 0.684066  | 0.000010  |
| 5             | 6             | 0           | 0.271019    | -0.717175 | -0.000017 |

|    |   |   |           |           |           |
|----|---|---|-----------|-----------|-----------|
| 6  | 6 | 0 | -0.939701 | -1.431391 | -0.000029 |
| 7  | 1 | 0 | -3.063162 | -1.198551 | -0.000011 |
| 8  | 1 | 0 | -3.025236 | 1.264959  | 0.000021  |
| 9  | 1 | 0 | -0.886372 | 2.527645  | 0.000039  |
| 10 | 1 | 0 | -0.949267 | -2.515755 | -0.000047 |
| 11 | 7 | 0 | 1.576040  | -1.158040 | -0.000005 |
| 12 | 7 | 0 | 2.352795  | -0.126457 | -0.000004 |
| 13 | 7 | 0 | 1.604573  | 0.988940  | 0.000018  |
| 14 | 1 | 0 | 2.058313  | 1.890549  | -0.000026 |

## wb97xd-Ox-benzotriazole

| Center Number | Atomic Number | Atomic Type | Coordinates |           |           |           |
|---------------|---------------|-------------|-------------|-----------|-----------|-----------|
|               |               |             | X           | Y         | Z         |           |
|               | 1             | 6           | 0           | -2.101270 | -0.706076 | 0.000029  |
|               | 2             | 6           | 0           | -2.126155 | 0.688483  | 0.000049  |
|               | 3             | 6           | 0           | -0.947877 | 1.427828  | -0.000056 |
|               | 4             | 6           | 0           | 0.272648  | 0.682451  | -0.000201 |
|               | 5             | 6           | 0           | 0.298101  | -0.725612 | -0.000131 |
|               | 6             | 6           | 0           | -0.870085 | -1.450850 | 0.000084  |
|               | 7             | 1           | 0           | -3.033997 | -1.257409 | -0.000055 |
|               | 8             | 1           | 0           | -3.078131 | 1.203947  | 0.000114  |
|               | 9             | 1           | 0           | -0.944217 | 2.510915  | -0.000037 |
|               | 10            | 1           | 0           | -0.877691 | -2.534528 | 0.000234  |
|               | 11            | 7           | 0           | 1.626038  | -1.128435 | -0.000307 |
|               | 12            | 7           | 0           | 2.362505  | -0.092055 | 0.000401  |
|               | 13            | 7           | 0           | 1.554222  | 1.025457  | 0.000047  |
|               | 14            | 1           | 0           | 1.982515  | 1.944955  | 0.000122  |

## b3lyp-diphenylallene

| Center Number | Atomic Number | Atomic Type | Coordinates |           |           |           |
|---------------|---------------|-------------|-------------|-----------|-----------|-----------|
|               |               |             | X           | Y         | Z         |           |
|               | 1             | 6           | 0           | -3.539860 | 0.607837  | -0.948127 |
|               | 2             | 6           | 0           | -2.348696 | 0.475451  | -0.212757 |
|               | 3             | 6           | 0           | -2.313422 | -0.447755 | 0.849717  |
|               | 4             | 6           | 0           | -3.436357 | -1.212270 | 1.163572  |
|               | 5             | 6           | 0           | -4.618223 | -1.072458 | 0.423908  |
|               | 6             | 6           | 0           | -4.664821 | -0.159192 | -0.633214 |
|               | 7             | 1           | 0           | -3.582472 | 1.316923  | -1.770871 |
|               | 8             | 1           | 0           | -1.401310 | -0.561840 | 1.428757  |
|               | 9             | 1           | 0           | -3.391459 | -1.919535 | 1.986904  |
|               | 10            | 1           | 0           | -5.491194 | -1.669362 | 0.670767  |
|               | 11            | 1           | 0           | -5.575589 | -0.041903 | -1.213413 |
|               | 12            | 6           | 0           | -1.182200 | 1.307300  | -0.578492 |
|               | 13            | 1           | 0           | -1.334427 | 1.992209  | -1.415089 |
|               | 14            | 6           | 0           | 0.000000  | 1.296672  | -0.000046 |
|               | 15            | 6           | 0           | 1.182199  | 1.307340  | 0.578399  |
|               | 16            | 1           | 0           | 1.334427  | 1.992310  | 1.414947  |
|               | 17            | 6           | 0           | 2.348696  | 0.475466  | 0.212723  |
|               | 18            | 6           | 0           | 3.539858  | 0.607902  | 0.948087  |
|               | 19            | 6           | 0           | 2.313424  | -0.447812 | -0.849689 |
|               | 20            | 6           | 0           | 4.664819  | -0.159149 | 0.633229  |



## Supplementary Information

|    |   |   |          |           |           |
|----|---|---|----------|-----------|-----------|
| 21 | 1 | 0 | 3.582469 | 1.317044  | 1.770782  |
| 22 | 6 | 0 | 3.436360 | -1.212349 | -1.163489 |
| 23 | 1 | 0 | 1.401313 | -0.561936 | -1.428723 |
| 24 | 6 | 0 | 4.618224 | -1.072486 | -0.423832 |
| 25 | 1 | 0 | 5.575587 | -0.041821 | 1.213421  |
| 26 | 1 | 0 | 3.391463 | -1.919669 | -1.986773 |
| 27 | 1 | 0 | 5.491195 | -1.669407 | -0.670649 |

b3lyp-diphenylallene

| Center | Atomic | Atomic | Coordinates |           |           |
|--------|--------|--------|-------------|-----------|-----------|
| Number | Number | Type   | X           | Y         | Z         |
| 1      | 6      | 0      | -3.539860   | 0.607837  | -0.948127 |
| 2      | 6      | 0      | -2.348696   | 0.475451  | -0.212757 |
| 3      | 6      | 0      | -2.313422   | -0.447755 | 0.849717  |
| 4      | 6      | 0      | -3.436357   | -1.212270 | 1.163572  |
| 5      | 6      | 0      | -4.618223   | -1.072458 | 0.423908  |
| 6      | 6      | 0      | -4.664821   | -0.159192 | -0.633214 |
| 7      | 1      | 0      | -3.582472   | 1.316923  | -1.770871 |
| 8      | 1      | 0      | -1.401310   | -0.561840 | 1.428757  |
| 9      | 1      | 0      | -3.391459   | -1.919535 | 1.986904  |
| 10     | 1      | 0      | -5.491194   | -1.669362 | 0.670767  |
| 11     | 1      | 0      | -5.575589   | -0.041903 | -1.213413 |
| 12     | 6      | 0      | -1.182200   | 1.307300  | -0.578492 |
| 13     | 1      | 0      | -1.334427   | 1.992209  | -1.415089 |
| 14     | 6      | 0      | 0.000000    | 1.296672  | -0.000046 |
| 15     | 6      | 0      | 1.182199    | 1.307340  | 0.578399  |
| 16     | 1      | 0      | 1.334427    | 1.992310  | 1.414947  |
| 17     | 6      | 0      | 2.348696    | 0.475466  | 0.212723  |
| 18     | 6      | 0      | 3.539858    | 0.607902  | 0.948087  |
| 19     | 6      | 0      | 2.313424    | -0.447812 | -0.849689 |
| 20     | 6      | 0      | 4.664819    | -0.159149 | 0.633229  |
| 21     | 1      | 0      | 3.582469    | 1.317044  | 1.770782  |
| 22     | 6      | 0      | 3.436360    | -1.212349 | -1.163489 |
| 23     | 1      | 0      | 1.401313    | -0.561936 | -1.428723 |
| 24     | 6      | 0      | 4.618224    | -1.072486 | -0.423832 |
| 25     | 1      | 0      | 5.575587    | -0.041821 | 1.213421  |
| 26     | 1      | 0      | 3.391463    | -1.919669 | -1.986773 |
| 27     | 1      | 0      | 5.491195    | -1.669407 | -0.670649 |

wb97xd-diphenylallene

| Center | Atomic | Atomic | Coordinates |           |           |
|--------|--------|--------|-------------|-----------|-----------|
| Number | Number | Type   | X           | Y         | Z         |
| 1      | 6      | 0      | -3.515653   | 0.613054  | 0.916273  |
| 2      | 6      | 0      | -2.308364   | 0.498029  | 0.216984  |
| 3      | 6      | 0      | -2.214752   | -0.443495 | -0.817882 |
| 4      | 6      | 0      | -3.303259   | -1.245318 | -1.143645 |
| 5      | 6      | 0      | -4.504324   | -1.122751 | -0.441491 |
| 6      | 6      | 0      | -4.606299   | -0.191209 | 0.589665  |
| 7      | 1      | 0      | -3.600869   | 1.337984  | 1.721299  |
| 8      | 1      | 0      | -1.282449   | -0.545302 | -1.366665 |
| 9      | 1      | 0      | -3.215340   | -1.969954 | -1.947263 |
| 10     | 1      | 0      | -5.352346   | -1.750043 | -0.697274 |
| 11     | 1      | 0      | -5.535211   | -0.088439 | 1.141924  |
| 12     | 6      | 0      | -1.170396   | 1.365724  | 0.592224  |
| 13     | 1      | 0      | -1.331040   | 2.042937  | 1.431137  |
| 14     | 6      | 0      | -0.000001   | 1.376174  | -0.000009 |
| 15     | 6      | 0      | 1.170393    | 1.365716  | -0.592243 |



Supplementary Information

|    |   |   |          |           |           |
|----|---|---|----------|-----------|-----------|
| 16 | 1 | 0 | 1.331036 | 2.042916  | -1.431167 |
| 17 | 6 | 0 | 2.308364 | 0.498028  | -0.216990 |
| 18 | 6 | 0 | 3.515645 | 0.613030  | -0.916296 |
| 19 | 6 | 0 | 2.214761 | -0.443465 | 0.817905  |
| 20 | 6 | 0 | 4.606291 | -0.191228 | -0.589679 |
| 21 | 1 | 0 | 3.600854 | 1.337936  | -1.721344 |
| 22 | 6 | 0 | 3.303269 | -1.245282 | 1.143677  |
| 23 | 1 | 0 | 1.282464 | -0.545252 | 1.366702  |
| 24 | 6 | 0 | 4.504326 | -1.122739 | 0.441505  |
| 25 | 1 | 0 | 5.535198 | -0.088477 | -1.141951 |
| 26 | 1 | 0 | 3.215358 | -1.969894 | 1.947318  |
| 27 | 1 | 0 | 5.352349 | -1.750027 | 0.697296  |

wb97xd-diphenylallene

| Center | Atomic Number | Atomic Number | Type      | Coordinates |           |   |
|--------|---------------|---------------|-----------|-------------|-----------|---|
|        |               |               |           | X           | Y         | Z |
| 1      | 6             | 0             | -3.515653 | 0.613054    | 0.916273  |   |
| 2      | 6             | 0             | -2.308364 | 0.498029    | 0.216984  |   |
| 3      | 6             | 0             | -2.214752 | -0.443495   | -0.817882 |   |
| 4      | 6             | 0             | -3.303259 | -1.245318   | -1.143645 |   |
| 5      | 6             | 0             | -4.504324 | -1.122751   | -0.441491 |   |
| 6      | 6             | 0             | -4.606299 | -0.191209   | 0.589665  |   |
| 7      | 1             | 0             | -3.600869 | 1.337984    | 1.721299  |   |
| 8      | 1             | 0             | -1.282449 | -0.545302   | -1.366665 |   |
| 9      | 1             | 0             | -3.215340 | -1.969954   | -1.947263 |   |
| 10     | 1             | 0             | -5.352346 | -1.750043   | -0.697274 |   |
| 11     | 1             | 0             | -5.535211 | -0.088439   | 1.141924  |   |
| 12     | 6             | 0             | -1.170396 | 1.365724    | 0.592224  |   |
| 13     | 1             | 0             | -1.331040 | 2.042937    | 1.431137  |   |
| 14     | 6             | 0             | -0.000001 | 1.376174    | -0.000009 |   |
| 15     | 6             | 0             | 1.170393  | 1.365716    | -0.592243 |   |
| 16     | 1             | 0             | 1.331036  | 2.042916    | -1.431167 |   |
| 17     | 6             | 0             | 2.308364  | 0.498028    | -0.216990 |   |
| 18     | 6             | 0             | 3.515645  | 0.613030    | -0.916296 |   |
| 19     | 6             | 0             | 2.214761  | -0.443465   | 0.817905  |   |
| 20     | 6             | 0             | 4.606291  | -0.191228   | -0.589679 |   |
| 21     | 1             | 0             | 3.600854  | 1.337936    | -1.721344 |   |
| 22     | 6             | 0             | 3.303269  | -1.245282   | 1.143677  |   |
| 23     | 1             | 0             | 1.282464  | -0.545252   | 1.366702  |   |
| 24     | 6             | 0             | 4.504326  | -1.122739   | 0.441505  |   |
| 25     | 1             | 0             | 5.535198  | -0.088477   | -1.141951 |   |
| 26     | 1             | 0             | 3.215358  | -1.969894   | 1.947318  |   |
| 27     | 1             | 0             | 5.352349  | -1.750027   | 0.697296  |   |

b3lyp-Selectfluor-salt

| Center Number | Atomic Number | Atomic Number | Type      | Coordinates |           |   |
|---------------|---------------|---------------|-----------|-------------|-----------|---|
|               |               |               |           | X           | Y         | Z |
| 1             | 6             | 0             | -1.695147 | 1.126070    | 1.446350  |   |
| 2             | 6             | 0             | -1.069663 | 1.817727    | 0.211306  |   |
| 3             | 6             | 0             | 0.045494  | -0.347653   | -0.188345 |   |
| 4             | 6             | 0             | -0.278045 | -0.896357   | 1.218439  |   |
| 5             | 1             | 0             | -1.720196 | 1.688442    | -0.653023 |   |
| 6             | 1             | 0             | -0.887785 | 2.875964    | 0.385309  |   |
| 7             | 1             | 0             | -2.504929 | 0.447451    | 1.180481  |   |
| 8             | 1             | 0             | -0.783552 | -0.506929   | -0.877513 |   |
| 9             | 1             | 0             | 0.959850  | -0.808430   | -0.558600 |   |
| 10            | 1             | 0             | 0.569230  | -1.404704   | 1.677456  |   |
| 11            | 1             | 0             | -1.157231 | -1.539397   | 1.193632  |   |
| 12            | 1             | 0             | -2.021265 | 1.849865    | 2.191879  |   |
| 13            | 7             | 0             | -0.617451 | 0.288149    | 2.078720  |   |
| 14            | 7             | 0             | 0.265442  | 1.161942    | -0.103406 |   |





|    |    |   |           |           |           |
|----|----|---|-----------|-----------|-----------|
| 15 | 6  | 0 | 0.602486  | 1.111141  | 2.376661  |
| 16 | 1  | 0 | 0.271056  | 1.989071  | 2.929742  |
| 17 | 1  | 0 | 1.264028  | 0.507065  | 2.995884  |
| 18 | 6  | 0 | 1.253140  | 1.455329  | 1.016724  |
| 19 | 1  | 0 | 2.141008  | 0.856473  | 0.816547  |
| 20 | 1  | 0 | 1.509342  | 2.512483  | 0.976259  |
| 21 | 6  | 0 | 0.820159  | 1.601534  | -1.449459 |
| 22 | 1  | 0 | 0.118481  | 1.275386  | -2.214107 |
| 23 | 1  | 0 | 1.792418  | 1.125205  | -1.561861 |
| 24 | 17 | 0 | 1.014175  | 3.365627  | -1.566031 |
| 25 | 9  | 0 | -1.116418 | -0.195986 | 3.298831  |
| 26 | 5  | 0 | 3.732636  | -1.584202 | -0.392105 |
| 27 | 9  | 0 | 2.586174  | -2.240538 | 0.122858  |
| 28 | 9  | 0 | 3.364364  | -0.237349 | -0.701233 |
| 29 | 9  | 0 | 4.751705  | -1.574799 | 0.574034  |
| 30 | 9  | 0 | 4.167702  | -2.226432 | -1.561860 |
| 31 | 5  | 0 | -3.791075 | -1.160405 | -0.913809 |
| 32 | 9  | 0 | -2.900715 | -0.209511 | -1.490834 |
| 33 | 9  | 0 | -5.085940 | -0.621258 | -0.864179 |
| 34 | 9  | 0 | -3.774685 | -2.341536 | -1.670063 |
| 35 | 9  | 0 | -3.337265 | -1.432364 | 0.409419  |

b3lyp-Red-Selectfluor-salt

| Center Number | Atomic Number | Atomic Type | Coordinates |           |           |
|---------------|---------------|-------------|-------------|-----------|-----------|
|               |               |             | X           | Y         | Z         |
| 1             | 6             | 0           | 1.020201    | 2.927056  | 0.149463  |
| 2             | 6             | 0           | 1.204242    | 1.589368  | 0.928479  |
| 3             | 6             | 0           | -0.136888   | 0.507954  | -0.857562 |
| 4             | 6             | 0           | -0.413727   | 1.895311  | -1.511568 |
| 5             | 1             | 0           | 2.082267    | 1.040359  | 0.588832  |
| 6             | 1             | 0           | 1.256048    | 1.747287  | 2.003996  |
| 7             | 1             | 0           | 1.767977    | 3.032913  | -0.636227 |
| 8             | 1             | 0           | 0.806325    | 0.077983  | -1.194060 |
| 9             | 1             | 0           | -0.956717   | -0.190053 | -1.030370 |
| 10            | 1             | 0           | -1.415317   | 1.939484  | -1.938638 |
| 11            | 1             | 0           | 0.316896    | 2.110227  | -2.291181 |
| 12            | 1             | 0           | 1.086015    | 3.782870  | 0.820700  |
| 13            | 7             | 0           | -0.304487   | 2.905422  | -0.463879 |
| 14            | 7             | 0           | -0.007361   | 0.703591  | 0.658014  |
| 15            | 6             | 0           | -1.373818   | 2.796085  | 0.524108  |
| 16            | 1             | 0           | -1.249090   | 3.587028  | 1.263342  |
| 17            | 1             | 0           | -2.333563   | 2.924341  | 0.024069  |
| 18            | 6             | 0           | -1.270116   | 1.384352  | 1.175245  |
| 19            | 1             | 0           | -2.103940   | 0.734872  | 0.908876  |
| 20            | 1             | 0           | -1.189326   | 1.444414  | 2.259426  |
| 21            | 6             | 0           | 0.158585    | -0.677138 | 1.253094  |
| 22            | 1             | 0           | 1.042440    | -1.133469 | 0.808691  |
| 23            | 1             | 0           | -0.752245   | -1.233354 | 1.038934  |
| 24            | 17            | 0           | 0.385435    | -0.643559 | 3.028177  |
| 25            | 9             | 0           | -0.546004   | 4.720612  | -1.365101 |
| 26            | 5             | 0           | -3.499012   | -1.903127 | -0.577375 |
| 27            | 9             | 0           | -2.744493   | -1.394851 | -1.662463 |
| 28            | 9             | 0           | -2.902172   | -1.456366 | 0.636155  |
| 29            | 9             | 0           | -4.820392   | -1.422315 | -0.649916 |
| 30            | 9             | 0           | -3.492464   | -3.310198 | -0.609568 |
| 31            | 5             | 0           | 3.671916    | -1.504480 | -0.727210 |
| 32            | 9             | 0           | 2.834425    | -2.167156 | 0.205931  |
| 33            | 9             | 0           | 4.945693    | -1.304978 | -0.161989 |
| 34            | 9             | 0           | 3.777280    | -2.274538 | -1.900449 |
| 35            | 9             | 0           | 3.090058    | -0.244363 | -1.038040 |

wb97xd-Selectfluor-salt

| Center Number | Atomic Number | Atomic Type | Coordinates |           |           |
|---------------|---------------|-------------|-------------|-----------|-----------|
|               |               |             | X           | Y         | Z         |
| 1             | 6             | 0           | -1.494404   | -1.107573 | 1.516803  |
| 2             | 6             | 0           | -1.209093   | 0.396429  | 1.360793  |
| 3             | 6             | 0           | -0.001748   | -0.276351 | -0.680740 |
| 4             | 6             | 0           | 0.035387    | -1.761775 | -0.293361 |
| 5             | 1             | 0           | -2.021425   | 0.877130  | 0.818045  |
| 6             | 1             | 0           | -1.070798   | 0.884891  | 2.323511  |
| 7             | 1             | 0           | -2.262023   | -1.455121 | 0.826185  |
| 8             | 1             | 0           | -0.927568   | -0.017756 | -1.191324 |

|    |    |   |           |           |           |
|----|----|---|-----------|-----------|-----------|
| 9  | 1  | 0 | 0.862742  | -0.027795 | -1.295123 |
| 10 | 1  | 0 | 1.012953  | -2.208236 | -0.466908 |
| 11 | 1  | 0 | -0.753146 | -2.318721 | -0.796757 |
| 12 | 1  | 0 | -1.750986 | -1.365139 | 2.542635  |
| 13 | 7  | 0 | -0.231983 | -1.829575 | 1.172600  |
| 14 | 7  | 0 | 0.064430  | 0.573907  | 0.571900  |
| 15 | 6  | 0 | 0.929830  | -1.300611 | 1.947951  |
| 16 | 1  | 0 | 0.649610  | -1.315497 | 2.999625  |
| 17 | 1  | 0 | 1.769392  | -1.970795 | 1.771401  |
| 18 | 6  | 0 | 1.222904  | 0.116003  | 1.418999  |
| 19 | 1  | 0 | 2.115265  | 0.134148  | 0.797992  |
| 20 | 1  | 0 | 1.340108  | 0.813638  | 2.245945  |
| 21 | 6  | 0 | 0.243659  | 1.995916  | 0.102773  |
| 22 | 1  | 0 | -0.586409 | 2.215142  | -0.567028 |
| 23 | 1  | 0 | 1.203197  | 2.042886  | -0.410502 |
| 24 | 17 | 0 | 0.232307  | 3.154329  | 1.436121  |
| 25 | 9  | 0 | -0.396804 | -3.159703 | 1.515894  |
| 26 | 5  | 0 | 3.759738  | -0.115604 | -1.107688 |
| 27 | 9  | 0 | 3.044447  | -1.318415 | -0.862951 |
| 28 | 9  | 0 | 2.822176  | 0.869759  | -1.526460 |
| 29 | 9  | 0 | 4.349955  | 0.309159  | 0.095566  |
| 30 | 9  | 0 | 4.720922  | -0.316206 | -2.096535 |
| 31 | 5  | 0 | -3.690101 | 0.089387  | -1.157490 |
| 32 | 9  | 0 | -2.779493 | 1.165719  | -1.345821 |
| 33 | 9  | 0 | -4.193673 | 0.154652  | 0.156763  |
| 34 | 9  | 0 | -4.718763 | 0.157065  | -2.093042 |
| 35 | 9  | 0 | -2.967062 | -1.124678 | -1.303043 |

wb97xd-Red-Selectfluor-salt

| Center Number | Atomic Number | Atomic Type | Coordinates |           |           |
|---------------|---------------|-------------|-------------|-----------|-----------|
|               |               |             | X           | Y         | Z         |
| 1             | 6             | 0           | 1.243670    | 2.284101  | 0.675129  |
| 2             | 6             | 0           | 1.194873    | 0.894989  | 1.356448  |
| 3             | 6             | 0           | 0.063983    | 0.188953  | -0.719776 |
| 4             | 6             | 0           | -0.170500   | 1.648656  | -1.171851 |
| 5             | 1             | 0           | 2.087075    | 0.308253  | 1.141566  |
| 6             | 1             | 0           | 1.050024    | 0.970696  | 2.433055  |
| 7             | 1             | 0           | 2.036913    | 2.326955  | -0.070257 |
| 8             | 1             | 0           | 1.047638    | -0.178121 | -1.008071 |
| 9             | 1             | 0           | -0.711774   | -0.475802 | -1.097529 |
| 10            | 1             | 0           | -1.171260   | 1.777915  | -1.581997 |
| 11            | 1             | 0           | 0.570431    | 1.947946  | -1.912210 |
| 12            | 1             | 0           | 1.393154    | 3.073851  | 1.410137  |
| 13            | 7             | 0           | -0.034716   | 2.484458  | 0.009730  |
| 14            | 7             | 0           | 0.005145    | 0.143170  | 0.799160  |
| 15            | 6             | 0           | -1.160466   | 2.327334  | 0.916869  |
| 16            | 1             | 0           | -0.982650   | 2.935134  | 1.803463  |
| 17            | 1             | 0           | -2.068556   | 2.671903  | 0.423538  |
| 18            | 6             | 0           | -1.264637   | 0.820605  | 1.261852  |
| 19            | 1             | 0           | -2.092886   | 0.337198  | 0.746542  |
| 20            | 1             | 0           | -1.358163   | 0.659153  | 2.334450  |
| 21            | 6             | 0           | 0.030089    | -1.309123 | 1.173222  |
| 22            | 1             | 0           | 0.941497    | -1.734650 | 0.755343  |
| 23            | 1             | 0           | -0.866787   | -1.767944 | 0.759525  |
| 24            | 17            | 0           | 0.049266    | -1.564290 | 2.929332  |
| 25            | 9             | 0           | -0.065707   | 4.394658  | -0.605357 |
| 26            | 5             | 0           | -3.555455   | -1.065225 | -0.938014 |
| 27            | 9             | 0           | -3.102392   | 0.171418  | -1.456280 |
| 28            | 9             | 0           | -2.434410   | -1.925862 | -0.794352 |
| 29            | 9             | 0           | -4.126823   | -0.848951 | 0.331093  |
| 30            | 9             | 0           | -4.489300   | -1.640749 | -1.806281 |
| 31            | 5             | 0           | 3.564709    | -1.024254 | -0.957547 |
| 32            | 9             | 0           | 3.084679    | -1.548832 | 0.272984  |
| 33            | 9             | 0           | 4.904265    | -1.386349 | -1.137634 |
| 34            | 9             | 0           | 2.770140    | -1.526626 | -2.005583 |
| 35            | 9             | 0           | 3.440267    | 0.384778  | -0.917701 |

b3lyp-Selectfluor-dication

| Center Number | Atomic Number | Atomic Type | Coordinates |           |          |
|---------------|---------------|-------------|-------------|-----------|----------|
|               |               |             | X           | Y         | Z        |
| 1             | 6             | 0           | -1.266314   | -0.670795 | 1.301483 |

|    |    |   |           |           |           |
|----|----|---|-----------|-----------|-----------|
| 2  | 6  | 0 | 0.267227  | -0.514456 | 1.174302  |
| 3  | 6  | 0 | -0.284817 | 1.656799  | 0.127330  |
| 4  | 6  | 0 | -1.762296 | 1.285849  | -0.132908 |
| 5  | 1  | 0 | 0.681595  | -0.071083 | 2.078685  |
| 6  | 1  | 0 | 0.759780  | -1.465781 | 0.985629  |
| 7  | 1  | 0 | -1.698540 | -0.054950 | 2.088001  |
| 8  | 1  | 0 | -0.134536 | 2.050460  | 1.131451  |
| 9  | 1  | 0 | 0.054678  | 2.390977  | -0.602284 |
| 10 | 1  | 0 | -2.101520 | 1.547143  | -1.134260 |
| 11 | 1  | 0 | -2.423234 | 1.726618  | 0.612221  |
| 12 | 1  | 0 | -1.552987 | -1.711712 | 1.444355  |
| 13 | 7  | 0 | -1.862177 | -0.208555 | -0.000426 |
| 14 | 7  | 0 | 0.578220  | 0.403615  | -0.001761 |
| 15 | 6  | 0 | -1.211756 | -0.899096 | -1.167556 |
| 16 | 1  | 0 | -1.221076 | -1.967717 | -0.957911 |
| 17 | 1  | 0 | -1.813196 | -0.690410 | -2.051120 |
| 18 | 6  | 0 | 0.212063  | -0.311677 | -1.295863 |
| 19 | 1  | 0 | 0.283381  | 0.418012  | -2.102057 |
| 20 | 1  | 0 | 0.936073  | -1.107347 | -1.463395 |
| 21 | 6  | 0 | 2.035552  | 0.850044  | -0.012612 |
| 22 | 1  | 0 | 2.198435  | 1.459355  | 0.873707  |
| 23 | 1  | 0 | 2.188808  | 1.425508  | -0.922562 |
| 24 | 17 | 0 | 3.168698  | -0.514571 | 0.004075  |
| 25 | 9  | 0 | -3.219532 | -0.549643 | 0.000057  |

## b3lyp-Red-Selectfluor-dication

| Center<br>Number | Atomic<br>Number | Atomic<br>Type | Coordinates |           |           |
|------------------|------------------|----------------|-------------|-----------|-----------|
|                  |                  |                | X           | Y         | Z         |
| 1                | 6                | 0              | 1.240710    | -0.690645 | -1.237588 |
| 2                | 6                | 0              | -0.301465   | -0.467899 | -1.211874 |
| 3                | 6                | 0              | 0.184028    | 1.685344  | -0.069522 |
| 4                | 6                | 0              | 1.691018    | 1.309320  | 0.056637  |
| 5                | 1                | 0              | -0.654925   | 0.056321  | -2.099587 |
| 6                | 1                | 0              | -0.849616   | -1.402120 | -1.104060 |
| 7                | 1                | 0              | 1.702646    | -0.176587 | -2.079949 |
| 8                | 1                | 0              | -0.043943   | 2.161474  | -1.022880 |
| 9                | 1                | 0              | -0.142553   | 2.330637  | 0.745999  |
| 10               | 1                | 0              | 2.106917    | 1.654561  | 1.002863  |
| 11               | 1                | 0              | 2.266224    | 1.737150  | -0.764111 |
| 12               | 1                | 0              | 1.477503    | -1.752845 | -1.295566 |
| 13               | 7                | 0              | 1.786453    | -0.145969 | 0.002237  |
| 14               | 7                | 0              | -0.645784   | 0.398776  | -0.001856 |
| 15               | 6                | 0              | 1.215217    | -0.782901 | 1.185494  |
| 16               | 1                | 0              | 1.309101    | -1.863317 | 1.081776  |
| 17               | 1                | 0              | 1.767822    | -0.460816 | 2.067888  |
| 18               | 6                | 0              | -0.277972   | -0.348771 | 1.278323  |
| 19               | 1                | 0              | -0.459382   | 0.337087  | 2.105974  |
| 20               | 1                | 0              | -0.945200   | -1.204329 | 1.364547  |
| 21               | 6                | 0              | -2.101301   | 0.810887  | -0.004234 |
| 22               | 1                | 0              | -2.281098   | 1.395859  | -0.903941 |
| 23               | 1                | 0              | -2.281181   | 1.400195  | 0.891850  |
| 24               | 17               | 0              | -3.222256   | -0.574952 | 0.001557  |
| 25               | 9                | 0              | 3.768881    | -0.588973 | -0.000374 |

## wb97xd-Selectfluor-dication

| Center Number | Atomic Number | Atomic Type | Coordinates |           |           |
|---------------|---------------|-------------|-------------|-----------|-----------|
|               |               |             | X           | Y         | Z         |
| 1             | 6             | 0           | -1.192429   | -0.910597 | -1.145204 |
| 2             | 6             | 0           | 0.208038    | -0.291699 | -1.292028 |
| 3             | 6             | 0           | 0.266669    | -0.524317 | 1.153958  |
| 4             | 6             | 0           | -1.260826   | -0.648680 | 1.300087  |
| 5             | 1             | 0           | 0.943887    | -1.070139 | -1.486207 |
| 6             | 1             | 0           | 0.251252    | 0.450357  | -2.088927 |
| 7             | 1             | 0           | -1.170167   | -1.973047 | -0.905789 |
| 8             | 1             | 0           | 0.732968    | -1.482925 | 0.935990  |
| 9             | 1             | 0           | 0.702187    | -0.112798 | 2.063240  |
| 10            | 1             | 0           | -1.674652   | -0.009787 | 2.077792  |
| 11            | 1             | 0           | -1.561795   | -1.680875 | 1.469592  |
| 12            | 1             | 0           | -1.800084   | -0.742921 | -2.032330 |
| 13            | 7             | 0           | -1.852814   | -0.209053 | -0.000792 |
| 14            | 7             | 0           | 0.574154    | 0.403659  | -0.000565 |
| 15            | 6             | 0           | -1.748080   | 1.274867  | -0.151338 |
| 16            | 1             | 0           | -2.060070   | 1.524108  | -1.164417 |
| 17            | 1             | 0           | -2.424580   | 1.728945  | 0.570710  |
| 18            | 6             | 0           | -0.283607   | 1.643971  | 0.141453  |
| 19            | 1             | 0           | -0.151120   | 2.019379  | 1.155194  |
| 20            | 1             | 0           | 0.063183    | 2.394722  | -0.567333 |
| 21            | 6             | 0           | 2.019593    | 0.846929  | -0.008706 |
| 22            | 1             | 0           | 2.183702    | 1.454901  | 0.878672  |
| 23            | 1             | 0           | 2.174727    | 1.427550  | -0.915443 |
| 24            | 17            | 0           | 3.141265    | -0.512477 | 0.003434  |
| 25            | 9             | 0           | -3.190720   | -0.546717 | -0.003216 |

## wb97xd-Red-Selectfluor-dication

| Center Number | Atomic Number | Atomic Type | Coordinates |           |           |
|---------------|---------------|-------------|-------------|-----------|-----------|
|               |               |             | X           | Y         | Z         |
| 1             | 6             | 0           | 1.235038    | -0.647328 | -1.251183 |
| 2             | 6             | 0           | -0.305865   | -0.504564 | -1.174553 |
| 3             | 6             | 0           | 0.186932    | 1.666350  | -0.117550 |
| 4             | 6             | 0           | 1.675889    | 1.299913  | 0.099577  |
| 5             | 1             | 0           | -0.720427   | -0.050561 | -2.074425 |
| 6             | 1             | 0           | -0.796587   | -1.459914 | -0.996256 |
| 7             | 1             | 0           | 1.654625    | -0.064784 | -2.070154 |
| 8             | 1             | 0           | 0.003090    | 2.072670  | -1.111967 |
| 9             | 1             | 0           | -0.170379   | 2.372361  | 0.631853  |
| 10            | 1             | 0           | 2.028611    | 1.611777  | 1.081904  |
| 11            | 1             | 0           | 2.300884    | 1.758663  | -0.665479 |
| 12            | 1             | 0           | 1.519301    | -1.691371 | -1.375838 |
| 13            | 7             | 0           | 1.777954    | -0.146966 | 0.001916  |
| 14            | 7             | 0           | -0.638852   | 0.395379  | -0.000250 |
| 15            | 6             | 0           | 1.195685    | -0.813613 | 1.155951  |
| 16            | 1             | 0           | 1.238558    | -1.890159 | 0.996441  |
| 17            | 1             | 0           | 1.772141    | -0.563843 | 2.045880  |
| 18            | 6             | 0           | -0.263111   | -0.310028 | 1.287740  |
| 19            | 1             | 0           | -0.380136   | 0.416373  | 2.092165  |
| 20            | 1             | 0           | -0.962042   | -1.131335 | 1.438260  |
| 21            | 6             | 0           | -2.082682   | 0.808267  | 0.001865  |
| 22            | 1             | 0           | -2.262340   | 1.402891  | -0.891724 |
| 23            | 1             | 0           | -2.258742   | 1.394180  | 0.901453  |

|    |    |   |           |           |           |
|----|----|---|-----------|-----------|-----------|
| 24 | 17 | 0 | -3.194761 | -0.567886 | -0.000770 |
| 25 | 9  | 0 | 3.724371  | -0.583973 | -0.001307 |

## b3lyp-Red-Selectfluor-defluorinated

| Center Number | Atomic Number | Atomic Type | Coordinates |           |           |
|---------------|---------------|-------------|-------------|-----------|-----------|
|               |               |             | X           | Y         | Z         |
| 1             | 6             | 0           | 1.558026    | -0.920371 | -1.251767 |
| 2             | 6             | 0           | 0.027088    | -0.542534 | -1.206525 |
| 3             | 6             | 0           | 0.742680    | 1.556735  | -0.076515 |
| 4             | 6             | 0           | 2.219410    | 1.024360  | 0.069102  |
| 5             | 1             | 0           | -0.258424   | -0.003913 | -2.108897 |
| 6             | 1             | 0           | -0.593562   | -1.427614 | -1.086774 |
| 7             | 1             | 0           | 2.064416    | -0.434092 | -2.083832 |
| 8             | 1             | 0           | 0.590543    | 2.045871  | -1.037356 |
| 9             | 1             | 0           | 0.504606    | 2.241829  | 0.735920  |
| 10            | 1             | 0           | 2.657018    | 1.312257  | 1.023483  |
| 11            | 1             | 0           | 2.833509    | 1.380767  | -0.757537 |
| 12            | 1             | 0           | 1.681638    | -2.001819 | -1.305007 |
| 13            | 7             | 0           | 2.079408    | -0.417491 | 0.003853  |
| 14            | 7             | 0           | -0.214155   | 0.365564  | -0.002112 |
| 15            | 6             | 0           | 1.510219    | -1.032528 | 1.187744  |
| 16            | 1             | 0           | 1.472404    | -2.112637 | 1.058666  |
| 17            | 1             | 0           | 2.095116    | -0.769695 | 2.069190  |
| 18            | 6             | 0           | 0.064431    | -0.410670 | 1.282157  |
| 19            | 1             | 0           | -0.016646   | 0.287279  | 2.113540  |
| 20            | 1             | 0           | -0.681750   | -1.196740 | 1.379217  |
| 21            | 6             | 0           | -1.631291   | 0.932996  | -0.004870 |
| 22            | 1             | 0           | -1.741526   | 1.534313  | -0.904380 |
| 23            | 1             | 0           | -1.741640   | 1.540118  | 0.890786  |
| 24            | 17            | 0           | -2.874462   | -0.334139 | 0.000284  |

## wb97xd-Red-Selectfluor-defluorinated

| Center Number | Atomic Number | Atomic Type | Coordinates |           |           |
|---------------|---------------|-------------|-------------|-----------|-----------|
|               |               |             | X           | Y         | Z         |
| 1             | 6             | 0           | 1.547965    | -0.908197 | -1.250529 |
| 2             | 6             | 0           | 0.018515    | -0.568119 | -1.179273 |
| 3             | 6             | 0           | 0.739170    | 1.541905  | -0.113264 |
| 4             | 6             | 0           | 2.202856    | 1.017603  | 0.083820  |
| 5             | 1             | 0           | -0.302766   | -0.069012 | -2.092082 |
| 6             | 1             | 0           | -0.577351   | -1.463816 | -1.017490 |
| 7             | 1             | 0           | 2.037712    | -0.395754 | -2.076451 |
| 8             | 1             | 0           | 0.606193    | 1.992982  | -1.095318 |
| 9             | 1             | 0           | 0.489364    | 2.263436  | 0.663059  |
| 10            | 1             | 0           | 2.605366    | 1.296952  | 1.055033  |
| 11            | 1             | 0           | 2.846439    | 1.379205  | -0.716818 |
| 12            | 1             | 0           | 1.693863    | -1.985418 | -1.323640 |
| 13            | 7             | 0           | 2.063301    | -0.417300 | 0.005720  |
| 14            | 7             | 0           | -0.212122   | 0.364033  | -0.005822 |
| 15            | 6             | 0           | 1.489514    | -1.034150 | 1.178528  |
| 16            | 1             | 0           | 1.424165    | -2.110115 | 1.033851  |
| 17            | 1             | 0           | 2.085340    | -0.800148 | 2.059970  |
| 18            | 6             | 0           | 0.071738    | -0.374836 | 1.286031  |

|    |    |   |           |           |           |
|----|----|---|-----------|-----------|-----------|
| 19 | 1  | 0 | 0.026576  | 0.349500  | 2.097649  |
| 20 | 1  | 0 | -0.690425 | -1.138704 | 1.426490  |
| 21 | 6  | 0 | -1.617087 | 0.928501  | -0.011580 |
| 22 | 1  | 0 | -1.729374 | 1.525906  | -0.913940 |
| 23 | 1  | 0 | -1.726575 | 1.543380  | 0.879219  |
| 24 | 17 | 0 | -2.850753 | -0.331281 | 0.003458  |

## wb97xd-Red-Selectfluor-defluorinated

| Center Number | Atomic Number | Atomic Type | Coordinates |           |           |           |
|---------------|---------------|-------------|-------------|-----------|-----------|-----------|
|               |               |             | X           | Y         | Z         |           |
|               | 1             | 6           | 0           | 1.547965  | -0.908197 | -1.250529 |
|               | 2             | 6           | 0           | 0.018515  | -0.568119 | -1.179273 |
|               | 3             | 6           | 0           | 0.739170  | 1.541905  | -0.113264 |
|               | 4             | 6           | 0           | 2.202856  | 1.017603  | 0.083820  |
|               | 5             | 1           | 0           | -0.302766 | -0.069012 | -2.092082 |
|               | 6             | 1           | 0           | -0.577351 | -1.463816 | -1.017490 |
|               | 7             | 1           | 0           | 2.037712  | -0.395754 | -2.076451 |
|               | 8             | 1           | 0           | 0.606193  | 1.992982  | -1.095318 |
|               | 9             | 1           | 0           | 0.489364  | 2.263436  | 0.663059  |
|               | 10            | 1           | 0           | 2.605366  | 1.296952  | 1.055033  |
|               | 11            | 1           | 0           | 2.846439  | 1.379205  | -0.716818 |
|               | 12            | 1           | 0           | 1.693863  | -1.985418 | -1.323640 |
|               | 13            | 7           | 0           | 2.063301  | -0.417300 | 0.005720  |
|               | 14            | 7           | 0           | -0.212122 | 0.364033  | -0.005822 |
|               | 15            | 6           | 0           | 1.489514  | -1.034150 | 1.178528  |
|               | 16            | 1           | 0           | 1.424165  | -2.110115 | 1.033851  |
|               | 17            | 1           | 0           | 2.085340  | -0.800148 | 2.059970  |
|               | 18            | 6           | 0           | 0.071738  | -0.374836 | 1.286031  |
|               | 19            | 1           | 0           | 0.026576  | 0.349500  | 2.097649  |
|               | 20            | 1           | 0           | -0.690425 | -1.138704 | 1.426490  |
|               | 21            | 6           | 0           | -1.617087 | 0.928501  | -0.011580 |
|               | 22            | 1           | 0           | -1.729374 | 1.525906  | -0.913940 |
|               | 23            | 1           | 0           | -1.726575 | 1.543380  | 0.879219  |
|               | 24            | 17          | 0           | -2.850753 | -0.331281 | 0.003458  |

## wb97xd-diphenylallene-F (DPA-F)

| Center Number | Atomic Number | Atomic Type | Coordinates |           |           |           |
|---------------|---------------|-------------|-------------|-----------|-----------|-----------|
|               |               |             | X           | Y         | Z         |           |
|               | 1             | 6           | 0           | 2.919794  | 0.029644  | -0.672842 |
|               | 2             | 6           | 0           | 1.764518  | 0.433477  | 0.033915  |
|               | 3             | 6           | 0           | 1.208335  | -0.432478 | 1.003126  |
|               | 4             | 6           | 0           | 1.765077  | -1.678184 | 1.215611  |
|               | 5             | 6           | 0           | 2.873494  | -2.088405 | 0.463491  |
|               | 6             | 6           | 0           | 3.452013  | -1.235050 | -0.476480 |
|               | 7             | 1           | 0           | 3.371977  | 0.707197  | -1.389998 |
|               | 8             | 1           | 0           | 0.367432  | -0.109138 | 1.605605  |
|               | 9             | 1           | 0           | 1.348646  | -2.335103 | 1.970606  |
|               | 10            | 1           | 0           | 3.299493  | -3.072057 | 0.630566  |
|               | 11            | 1           | 0           | 4.322253  | -1.551307 | -1.039784 |
|               | 12            | 6           | 0           | 1.255002  | 1.740408  | -0.234064 |
|               | 13            | 1           | 0           | 1.973832  | 2.461395  | -0.620491 |
|               | 14            | 6           | 0           | -0.000004 | 2.287842  | 0.000000  |
|               | 15            | 6           | 0           | -1.255009 | 1.740409  | 0.234064  |
|               | 16            | 1           | 0           | -1.973841 | 2.461396  | 0.620489  |

|    |   |   |           |           |           |
|----|---|---|-----------|-----------|-----------|
| 17 | 6 | 0 | -1.764522 | 0.433476  | -0.033916 |
| 18 | 6 | 0 | -2.919796 | 0.029638  | 0.672842  |
| 19 | 6 | 0 | -1.208336 | -0.432475 | -1.003128 |
| 20 | 6 | 0 | -3.452008 | -1.235059 | 0.476481  |
| 21 | 1 | 0 | -3.371982 | 0.707189  | 1.389998  |
| 22 | 6 | 0 | -1.765072 | -1.678185 | -1.215612 |
| 23 | 1 | 0 | -0.367436 | -0.109131 | -1.605607 |
| 24 | 6 | 0 | -2.873486 | -2.088412 | -0.463490 |
| 25 | 1 | 0 | -4.322246 | -1.551320 | 1.039785  |
| 26 | 1 | 0 | -1.348639 | -2.335102 | -1.970608 |
| 27 | 1 | 0 | -3.299479 | -3.072066 | -0.630564 |
| 28 | 9 | 0 | -0.000002 | 3.648685  | 0.000002  |

b3lyp-diphenylallene-F-benzotriazole (DPA-F-BN)

| Center<br>Number | Atomic<br>Number | Atomic<br>Type | Coordinates |           |           |
|------------------|------------------|----------------|-------------|-----------|-----------|
|                  |                  |                | X           | Y         | Z         |
| 1                | 6                | 0              | -2.337287   | 2.124134  | -0.858047 |
| 2                | 6                | 0              | -1.050921   | 1.801804  | -0.399708 |
| 3                | 6                | 0              | -0.404327   | 2.675857  | 0.481881  |
| 4                | 6                | 0              | -1.036573   | 3.849640  | 0.906342  |
| 5                | 6                | 0              | -2.319396   | 4.162246  | 0.451640  |
| 6                | 6                | 0              | -2.967826   | 3.295378  | -0.434841 |
| 7                | 1                | 0              | -2.849348   | 1.459553  | -1.547932 |
| 8                | 1                | 0              | 0.594394    | 2.451534  | 0.841659  |
| 9                | 1                | 0              | -0.522903   | 4.515529  | 1.593304  |
| 10               | 1                | 0              | -2.810158   | 5.072574  | 0.782635  |
| 11               | 1                | 0              | -3.963620   | 3.530630  | -0.798524 |
| 12               | 6                | 0              | -0.357089   | 0.547257  | -0.942617 |
| 13               | 1                | 0              | -0.123909   | 0.710415  | -1.998591 |
| 14               | 6                | 0              | 0.940500    | 0.184806  | -0.270167 |
| 15               | 6                | 0              | 2.151112    | 0.173557  | -0.841211 |
| 16               | 1                | 0              | 2.152386    | 0.462423  | -1.888786 |
| 17               | 6                | 0              | 3.466879    | -0.154607 | -0.278961 |
| 18               | 6                | 0              | 4.584833    | -0.034523 | -1.130631 |
| 19               | 6                | 0              | 3.684165    | -0.581576 | 1.048608  |
| 20               | 6                | 0              | 5.871898    | -0.326096 | -0.678773 |
| 21               | 1                | 0              | 4.437770    | 0.291771  | -2.156691 |
| 22               | 6                | 0              | 4.973389    | -0.872745 | 1.496674  |
| 23               | 1                | 0              | 2.849175    | -0.687626 | 1.729185  |
| 24               | 6                | 0              | 6.072242    | -0.747168 | 0.639567  |
| 25               | 1                | 0              | 6.715734    | -0.225061 | -1.354882 |
| 26               | 1                | 0              | 5.119512    | -1.200529 | 2.521830  |
| 27               | 1                | 0              | 7.072370    | -0.975745 | 0.995531  |
| 28               | 6                | 0              | -3.810242   | -2.818978 | 1.383700  |
| 29               | 6                | 0              | -3.213441   | -1.698673 | 2.020291  |
| 30               | 6                | 0              | -2.330247   | -0.856481 | 1.359697  |
| 31               | 6                | 0              | -2.053634   | -1.171169 | 0.017118  |
| 32               | 6                | 0              | -2.643701   | -2.280948 | -0.623713 |
| 33               | 6                | 0              | -3.537093   | -3.125988 | 0.060167  |
| 34               | 1                | 0              | -4.493293   | -3.442971 | 1.951270  |
| 35               | 1                | 0              | -3.456405   | -1.495520 | 3.058748  |
| 36               | 1                | 0              | -1.878370   | -0.007281 | 1.856877  |
| 37               | 1                | 0              | -3.987789   | -3.978795 | -0.436683 |
| 38               | 7                | 0              | -2.190260   | -2.326566 | -1.925392 |
| 39               | 7                | 0              | -1.377759   | -1.333714 | -2.110799 |
| 40               | 7                | 0              | -1.272467   | -0.609591 | -0.961859 |
| 41               | 9                | 0              | 0.769821    | -0.162907 | 1.043922  |
